1 **Title:** Climate explains geographic and temporal variation in mosquito-borne disease  
2 dynamics on two continents

3

4 Jamie M. Caldwell<sup>1</sup>, A. Desiree LaBeaud<sup>2</sup>, Eric F. Lambin<sup>3,4</sup>, Anna M. Stewart-Ibarra<sup>5,6</sup>,  
5 Bryson A. Ndenga<sup>7</sup>, Francis M. Mutuku<sup>8</sup>, Amy R. Krystosik<sup>2</sup>, Efraín Beltrán Ayala<sup>9</sup>,  
6 Assaf Anyamba<sup>10</sup>, Mercy J. Borbor-Cordova<sup>11</sup>, Richard Damoah<sup>12</sup>, Elysse N. Grossi-  
7 Soyster<sup>2</sup>, Froilán Heras Heras<sup>13</sup>, Harun N. Ngugi<sup>14,15</sup>, Sadie J. Ryan<sup>16-18</sup>, Melisa M.  
8 Shah<sup>19</sup>, Rachel Sippy<sup>13,20,21</sup>, Erin A. Mordecai<sup>1</sup>

9

10 <sup>1</sup> Department of Biology, Stanford University, 371 Serra Mall, Stanford, California, USA

11 <sup>2</sup> Department of Pediatrics, Division of Infectious Diseases, Stanford University, 300  
12 Pasteur Drive, Stanford, California, USA

13 <sup>3</sup> School of Earth, Energy & Environmental Sciences, and Woods Institute for the  
14 Environment, Stanford University, Stanford, California 94305, USA.

15 <sup>4</sup> Georges Lemaître Earth and Climate Research Centre, Earth and Life Institute,  
16 Université catholique de Louvain, 1348 Louvain-la-Neuve, Belgium.

17 <sup>5</sup> Department of Medicine and Department of Public Health and Preventative Medicine,  
18 SUNY Upstate Medical University, Syracuse, NY, USA

19 <sup>6</sup> InterAmerican Institute for Global Change Research (IAI), Montevideo, Uruguay

20 <sup>7</sup> Centre for Global Health Research, Kenya Medical Research Institute, Kisumu, Kenya

21 <sup>8</sup> Department of environment and health sciences, Technical University of Mombasa,  
22 Mombasa, Kenya

23 <sup>9</sup> Technical University of Machala, Machala, Ecuador

24 <sup>10</sup> Universities Space Research Association and NASA Goddard Space Flight Center,  
25 Greenbelt, MD, USA.

26 <sup>11</sup> Facultad de Ingeniería Marítima y Ciencias del Mar, Escuela Superior Politécnica del  
27 Litoral, ESPOL, Guayaquil, Ecuador

28 <sup>12</sup> Morgan State University and NASA Goddard Space Flight Center, Greenbelt, MD,  
29 USA.

30 <sup>13</sup> Center for Research SUNY-Upstate-Teófilo Dávila Hospital, Machala, Ecuador

31 <sup>14</sup> Department of Biological Sciences, Chuka University, Chuka, Kenya

32 <sup>15</sup> Department of Zoology, School of Biological Sciences University of Nairobi, Nairobi,  
33 Kenya

34 <sup>16</sup> Emerging Pathogens Institute, University of Florida, Gainesville, Florida

35 <sup>17</sup> Quantitative Disease Ecology and Conservation (QDEC) Lab, Department of  
36 Geography, University of Florida, Gainesville, Florida;

37 <sup>18</sup> School of Life Sciences, University of KwaZulu, Natal, South Africa

38 <sup>19</sup> Department of Medicine, Division of Infectious Diseases, Stanford University, 300  
39 Pasteur Drive, Stanford, California, USA

40 <sup>20</sup> Institute for Global Health and Translational Science, SUNY-Upstate Medical  
41 University, Syracuse, NY, USA

42 <sup>21</sup> Department of Medical Geography, University of Florida, Gainesville, FL, USA

43

44

45

46

47 **Abstract:**

48 Climate drives population dynamics, but when the underlying mechanisms are  
49 unresolved, studies can lead to seemingly contradictory effects of climate on natural  
50 populations. Climate-sensitive vector-borne diseases such as dengue, chikungunya, and  
51 Zika are one example where climate appears to have opposing effects in different  
52 contexts. In this study, we use a mathematical model to directly connect climate-driven  
53 mosquito physiology measured in laboratory studies to observed vector and disease  
54 dynamics in the field across ecologically and culturally distinct settings in Ecuador and  
55 Kenya. We show that temperature, rainfall, and humidity predict *Aedes aegypti*  
56 abundances and laboratory-confirmed arboviral incidence across ecologically distinct  
57 settings. Further, this trait-based approach resolves seemingly contradictory results from  
58 prior field studies and highlights climate conditions where mechanisms remain  
59 unresolved. Using this mechanistic model, we tested several intervention strategies and  
60 found that reducing immature mosquito habitat or contact rate between mosquitoes and  
61 humans are more effective interventions than killing adult mosquitoes. These results can  
62 help guide intervention efforts and improve climate change predictions for vector-borne  
63 diseases.

64

65 **Introduction:**

66 Climate is a major driver of species interactions and population dynamics, but the  
67 mechanisms underlying these relationships are often poorly understood and rarely tested  
68 in the field [1]. One of the primary ways that climate impacts populations is through its  
69 effects on species' vital rates [2]. However, these mechanistic effects can lead to

70 seemingly contradictory results in the field because multiple climate variables may act  
71 synergistically, with each climate variable potentially affecting multiple vital rates, and  
72 their impacts may be nonlinear, changing direction and relative importance across a  
73 gradient of conditions. Vector-borne diseases provide an interesting case study to test  
74 whether climate sensitive traits measured in controlled, laboratory settings can reconcile  
75 seemingly contradictory results from field studies. For example, mosquito-borne  
76 arboviral diseases such as dengue, chikungunya, and Zika are clearly climate-sensitive: a  
77 body of field research has consistently identified temperature, rainfall, and humidity as  
78 important predictors of disease, but sometimes with opposite conclusions about the  
79 magnitude and direction of effects of climate on mosquito and disease dynamics [3–8].  
80 For example, dengue incidence correlated with temperature positively in Mexico [9] but  
81 negatively in Thailand [10]. We hypothesize that such opposing effects could be  
82 simultaneously correct if disease dynamics are context-dependent or nonlinear, and each  
83 model describes true disease dynamics but only within a small subset of conditions (e.g.,  
84 specific locations or seasons).

85

86 Understanding the mechanisms that drive disease dynamics is particularly important for  
87 arboviruses like dengue, chikungunya, and Zika because they are a major public health  
88 burden, vector control is the main method for breaking transmission cycles, and the  
89 burden and distribution of these diseases are projected to shift geographically in the  
90 future [11–13]. Half of the world’s population is currently at risk of contracting dengue  
91 [14]. With no widely available vaccine, vector control remains the primary method for  
92 preventing arboviral disease transmission. Existing vector control methods focus on

93 reducing immature habitat, reducing adult populations, or employing personal protection  
94 to reduce contact between infected mosquitoes and people [15]. Like other vector-borne  
95 diseases with complex transmission dynamics, model simulations can help guide  
96 effective intervention efforts [16,17]. Further, mechanistic models are better suited to  
97 predict how climate change will impact future disease burden and distribution, as  
98 projected climate conditions are outside the current arboviral climate niche space.

99

100 Dengue, chikungunya, and Zika are climate-sensitive diseases because of the ecology of  
101 *Aedes aegypti*, the primary disease vector. *Ae. aegypti* are anthropophilic, globally  
102 distributed mosquitoes that breed in artificial containers with standing water [18,19]. All  
103 mosquito and parasite traits that are important for transmission and linked to metabolism,  
104 such as reproduction, development, survival, biting rate, and extrinsic incubation period,  
105 are temperature dependent with a thermal optima [20–22]. Humidity is positively  
106 associated with mosquito survival because the high surface area to volume ratio of  
107 mosquitoes exposes them to desiccation [23,24]. Standing water from rainfall provides  
108 essential larval and pupal habitat for mosquitoes, but the relationship is complex because  
109 heavy rainfall can flush away breeding habitats [25–27] and water storage practices  
110 during droughts can increase water availability, mosquito abundance, and contact  
111 between mosquitoes and people [28–30].

112

113 In this study, our goal was to test the extent to which climate-driven mosquito traits drive  
114 disease dynamics across two geographically distinct regions and to characterize the  
115 effectiveness of different intervention strategies in those regions. Specifically, we asked:

116 1) how accurately do mechanistic model predictions reproduce observed mosquito and  
117 disease dynamics in the field, 2) are there conditions where the model systematically fails  
118 to reproduce observed disease dynamics, and 3) what is the relative effectiveness of  
119 different intervention strategies given different levels of intervention effort? To answer  
120 these questions, we adapted a mechanistic model for arboviral transmission as a function  
121 of climate and independently validated the models with data collected on *Ae. aegypti*  
122 abundances and laboratory-confirmed dengue, chikungunya, and Zika cases from two  
123 equatorial countries with distinct socioeconomic, geographic, cultural, and disease  
124 transmission settings: Ecuador and Kenya (Fig. 1, Table S1). The study sites within each  
125 country were distributed across a temperature gradient with similar ranges of humidity  
126 and rainfall. Previous studies have found that *Ae. aegypti* and dengue were positively  
127 associated with warm and wet conditions in Ecuador and Kenya [31–34], although other  
128 *Ae. aegypti*-vectored arboviruses in Kenya such as chikungunya have been associated  
129 with warm and dry conditions [35]. In addition to similar climate conditions, both  
130 countries have hyperendemic transmission of all four dengue serotypes and have recently  
131 experienced outbreaks of chikungunya; yet, arboviral transmission dynamics differ in  
132 each country. In Ecuador, dengue is a re-emerging disease with large seasonal epidemics  
133 that frequently result in severe dengue [31]; by contrast, in Kenya, dengue has low levels  
134 of year-round transmission [36] and intermittent self-limiting outbreaks that are often  
135 undetected [37]. Further, compared with South America, sub-Saharan Africa lacks severe  
136 dengue, perhaps because African strains of *Ae. aegypti* have lower susceptibility to all  
137 four dengue serotypes [38], and/or because people of African ancestry are less  
138 susceptible to severe dengue [39].

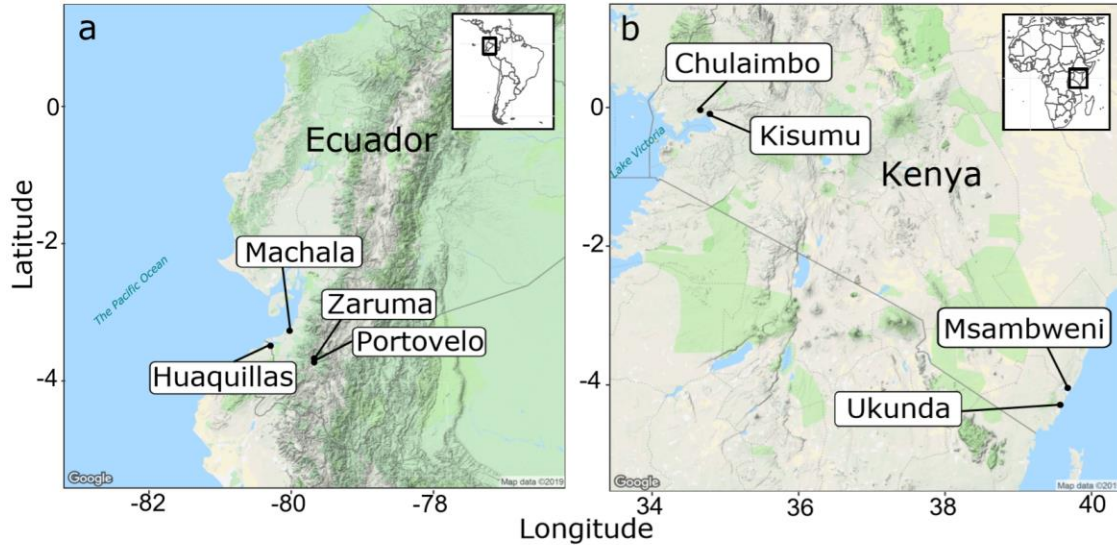

139

140 **Figure 1: Study sites with distinct socioeconomic, geographic, cultural, and disease**  
141 **transmission settings.** Study sites within a) Ecuador in South America and b) Kenya in  
142 East Africa. See Table S1 for additional site characteristics.

143

144 **Results:**

145 **Relationship between model predictions and observed disease dynamics**

146 The dynamic susceptible, exposed, infectious – susceptible, exposed, infectious, removed  
147 (SEI-SEIR) compartmental model (Fig. 2) parameterized with temperature-, rainfall-, and  
148 humidity-dependent mosquito life history traits was strongly associated with mosquito  
149 abundances and disease dynamics across sites and through time. Model-predicted  
150 mosquito abundances and field-collected observations of mosquito abundances  
151 corresponded with each other in 65% of the surveys (sample size  $N = 277$  site-months)  
152 (Table 1), based on whether the z-scores of predictions and observations were within one  
153 standard deviation of each other. Based on surveys conducted across all vector life stages  
154 in Kenya (only adult mosquitoes were collected in the Ecuador surveys), the SEI-SEIR



155 model had similar correspondence with the abundance of adult mosquitoes (60%,  $N =$   
 156 217) to pupae (60%,  $N = 217$ ), late instars (57%,  $N = 217$ ), early instars (56%,  $N = 217$ ),  
 157 and eggs (50%,  $N = 216$ ), likely because the dynamics were consistent across life stages.  
 158 Model-predicted disease cases corresponded with laboratory-confirmed arboviral  
 159 incidence in 83% of the surveys ( $N = 388$  site-months) (Table 1). We used z-scores for  
 160 comparison because the model predictions represent total population estimates whereas  
 161 observations come from sub-samples of the mosquito and human population.  
 162

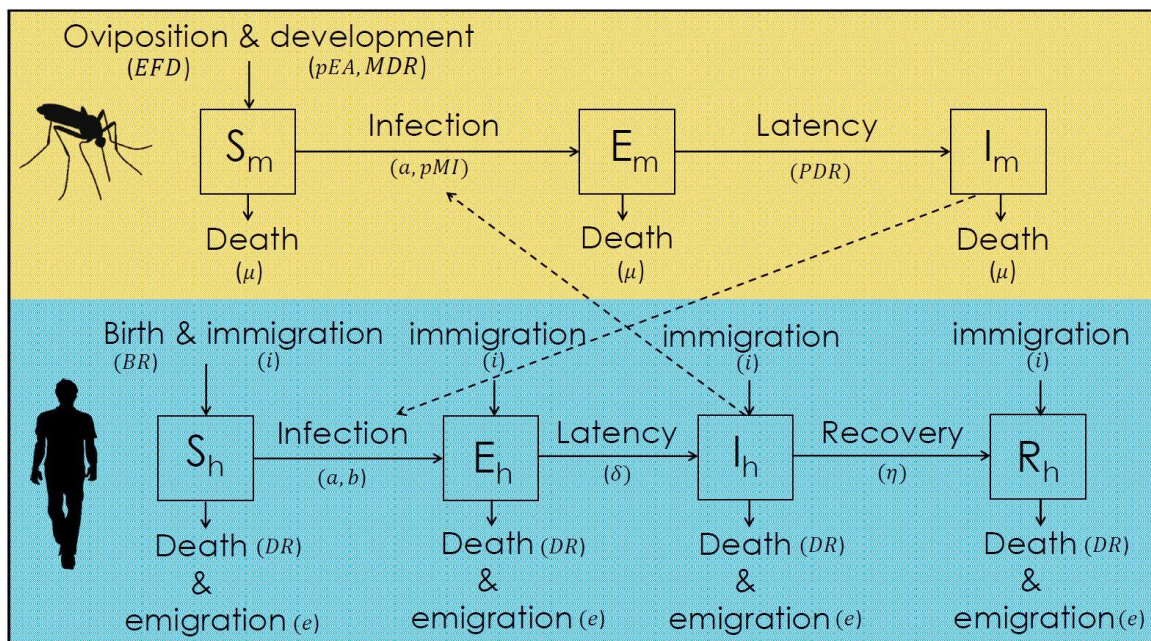

163  
 164 **Figure 2: SEI-SEIR epidemiological model framework.** The mosquito population (top  
 165 panel, orange) is split among susceptible ( $S_m$ ), exposed ( $E_m$ ), and infectious ( $I_m$ )  
 166 compartments (squares) and the human population (bottom panel, blue) is split among  
 167 susceptible ( $S_h$ ), exposed ( $E_h$ ), infectious ( $I_h$ ), and recovered ( $R_h$ ) compartments. Solid  
 168 arrows indicate the direction individuals can move between classes and dashed arrows  
 169 indicate the direction of transmission. Transitions among compartments are labeled by



170 the appropriate processes and corresponding rate parameters (see Methods for more  
171 detail).

172

173 **Table 1: Model accurately predicted mosquito abundances and arboviral cases for**  
174 **majority of surveys.** Rows correspond to comparisons between model predictions and  
175 field observations for mosquito abundances or arboviral cases. Correspondence indicates  
176 that z-scores of model predictions and field observations fell within one standard  
177 deviation of each other. Overprediction indicates that the z-score of the model predictions  
178 were more than one standard deviation above the z-score of the observations, and vice  
179 versa for underprediction. The percent of total surveys are presented in parentheses  
180 beside the total number of surveys (N) in each category. Table S2 shows the same data  
181 separated by site.

| Comparison      | Correspondence | Overprediction | Underprediction | N   |
|-----------------|----------------|----------------|-----------------|-----|
| Mosquitoes      | 179 (65%)      | 52 (19%)       | 46 (16%)        | 277 |
| Arboviral cases | 322 (83%)      | 30 (8%)        | 36 (9%)         | 388 |

182

183

184 We explored three additional aspects of model fit and found that the model predicted the  
185 magnitude of observations moderately well and detected trends through time and  
186 differences across sites. Model-predicted mosquito abundances were positively correlated  
187 with field-collected observations of mosquito abundances (Pearson's correlation  
188 coefficient  $r = 0.35$ , sample size  $N = 277$ ) (Fig. 3) and predictions and observations  
189 synchronously increased and decreased through time within sites (Exact two-tailed sign  
190 test,  $p < 0.05$ ), but the annual proportion of observations predicted by the model differed  
191 across sites ( $F(7,24) = 10.75$ ,  $p < 0.001$ ). Similarly, model-predicted disease cases

192 correlated positively with laboratory-confirmed arboviral incidence ( $r = 0.19$ ,  $N = 388$ )  
193 (Fig. 3) and predictions and observations synchronously increased and decreased through  
194 time within sites (Exact two-tailed sign test,  $p < 0.001$ ), but the annual proportion of  
195 observations predicted by the model differed across sites ( $F(7,18) = 358.8$ ,  $p < 0.001$ ).  
196 Chikungunya and Zika incidence were only confirmed in Huaquillas and Machala,  
197 Ecuador ( $N_{\text{dengue}} = 366$ ,  $N_{\text{chikungunya}} = 35$ ,  $N_{\text{Zika}} = 14$ ); in those sites, arboviral incidence for  
198 each disease peaked at different times and corresponded better with model predictions  
199 than dengue alone (Fig. 4).

200

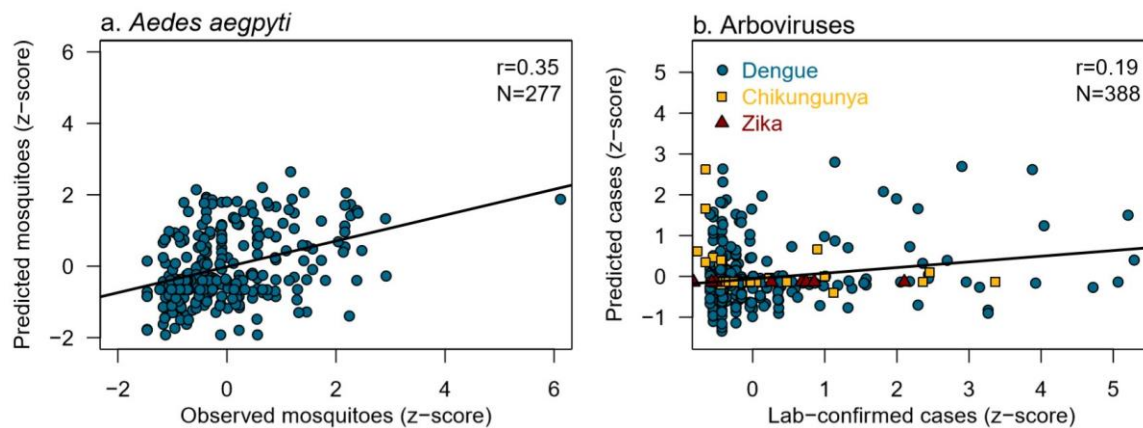

201

202 **Figure 3: The SEI-SEIR model positively correlated with field observations of**  
203 **mosquito abundances and arboviral cases across all sites.** a) Scatterplot of the z-score  
204 of the total modeled mosquito population versus the z-score of the mean number of adult  
205 *Ae. aegypti* trapped per house, across sites and months between 2014 and 2018. b)  
206 Scatterplot of the z-score of predicted disease cases in the human population versus the z-  
207 score of laboratory-confirmed dengue, chikungunya, and Zika cases, across sites and  
208 months between 2014 and 2018. The solid black lines are regression lines. Pearson's

209 correlation coefficient,  $r$ , based on the raw data, and the sample size,  $N$ , are presented in  
210 the top right corner of the plots.

211

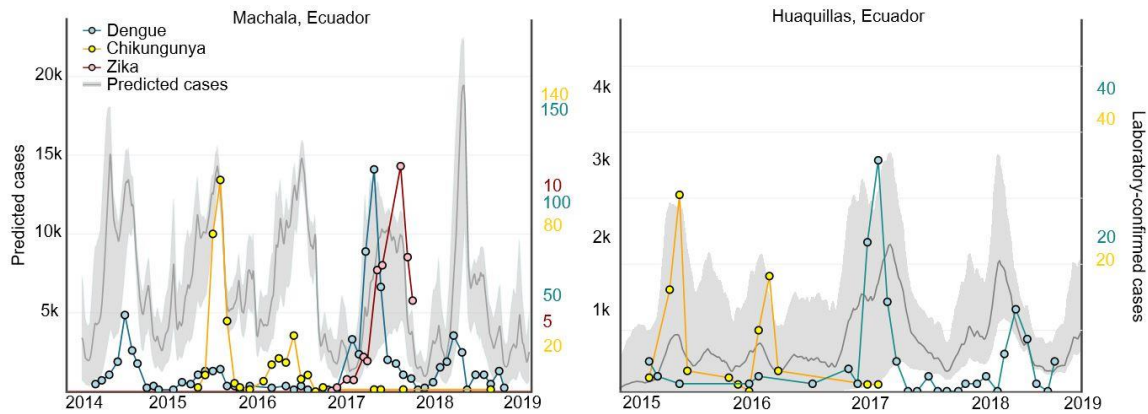

212

213 **Figure 4: Model-predicted disease cases reproduced general patterns of arboviral**  
214 **transmission.** Solid grey line and shaded grey region shows median and 95% confidence  
215 interval for model-predicted disease cases, blue dots and lines show laboratory-confirmed  
216 dengue cases, yellow dots and lines show laboratory-confirmed chikungunya cases, and  
217 red dots and lines show laboratory-confirmed Zika cases (note that the y-axis scales  
218 differ for the three diseases). The 95% confidence intervals are based on 50 model  
219 simulations using different  $c$ ,  $T_0$ , and  $T_{max}$  estimates (see Methods) for temperature-  
220 dependent traits from the posterior distributions found in [20].

221

222 We tested three hypothesized functional relationships between rainfall and mosquito  
223 carrying capacity in the SEI-SEIR model (Fig. S1) and found that the rainfall function  
224 that correlated most strongly with field observations differed by response variable  
225 (mosquito abundance and arboviral incidence) and site (Table 2). We used correlation to  
226 determine the best rainfall function because correlation is the most sensitive metric for

227 magnitude and the rainfall function in the model affects the magnitude of mosquitoes via  
228 carrying capacity. The model with the left-skewed unimodal (Brière) rainfall function  
229 (Fig. S1a), which indicates that mosquito abundances increase with increasing rainfall  
230 until some threshold where flushing occurs, described observed mosquito and disease  
231 dynamics most often (Table 2).

232

233 **Table 2: Rainfall differentially affects mosquito and disease dynamics across sites.**

234 Each row corresponds to a study site and indicates the rainfall function that correlated  
235 most strongly with field observations of *Ae. aegypti* abundances and arboviral cases, and  
236 the associated Pearson's correlation coefficient. The left-skewed unimodal Brière rainfall  
237 function (Fig. S1a) indicates that mosquito abundances increase with increasing rainfall  
238 until some threshold where flushing occurs. The symmetric unimodal quadratic rainfall  
239 function (Fig. S1b) indicates that mosquito abundances peak with intermediate amounts  
240 of rainfall and are reduced with low and high rainfall values. The exponentially  
241 decreasing inverse rain function (Fig. S1c) indicates that mosquito abundances peak  
242 when there is no or low rainfall, likely as a result of water storage practices. All measures  
243 of model fit (i.e., correspondence, correlation, sign tests, and ANOVAs) were based on  
244 models where the different rainfall functions listed in this table were used.

|         |            | <i>Aedes aegypti</i> |             | Arboviruses   |             |
|---------|------------|----------------------|-------------|---------------|-------------|
| Country | Site       | Rain function        | Correlation | Rain function | Correlation |
| Ecuador | Huaquillas | Brière               | 0.36        | Inverse       | 0.63        |
| Ecuador | Machala    | Quadratic            | 0.63        | Brière        | 0.12        |
| Ecuador | Portovelo  | Brière               | 0.66        | Brière        | 0.07        |
| Ecuador | Zaruma     | Brière               | 0.41        | Brière        | 0.30        |
| Kenya   | Chulaimbo  | Brière               | 0.21        | Quadratic     | 0.02        |
| Kenya   | Kisumu     | Brière               | 0.50        | Brière        | 0.25        |
| Kenya   | Msambweni  | Inverse              | 0.28        | Quadratic     | 0.28        |
| Kenya   | Ukunda     | Brière               | 0.31        | Inverse       | 0.07        |

245

246 **Identifying conditions that systematically lead to divergence between predictions and**  
247 **observations**

248 To determine if climate-based, geographical, and urbanization factors could explain  
249 conditions where the models consistently over- or underpredicted mosquito abundances  
250 and arboviral cases (Table 1), we used classification and regression tree (CART) models.  
251 We found that the model systematically overpredicted mosquito abundances when there  
252 was low to moderate rainfall (<55 mm) and moderate to high humidity (>1.2 kPA) (Fig.  
253 5a). The model systematically overpredicted arboviral cases when there was high mean  
254 temperature (>29°C) or high minimum temperature (>24°C) (Fig. 5b). We did not find  
255 evidence of any conditions that systematically led to underpredicting mosquito  
256 abundances or arboviral cases, likely because there were many predicted and observed  
257 zeros. The 29°C breakpoint that we identified for arboviral cases aligns with the point at  
258 which the model predicts that the relative basic reproductive number ( $R_0$ ) declines (Fig.  
259 6). However, the CART results suggest that temperature-dependent mosquito traits may  
260 be more constrained at high temperatures than previously estimated from laboratory  
261 studies, potentially because of daily temperature variation. Previous field studies  
262 estimating the effects of temperature on dengue transmission further support this finding  
263 where, in general, locations with mean temperature below 29°C show a positive  
264 relationship with dengue incidence whereas locations with mean temperatures above  
265 29°C show negative relationships (Fig. 6).

266

267

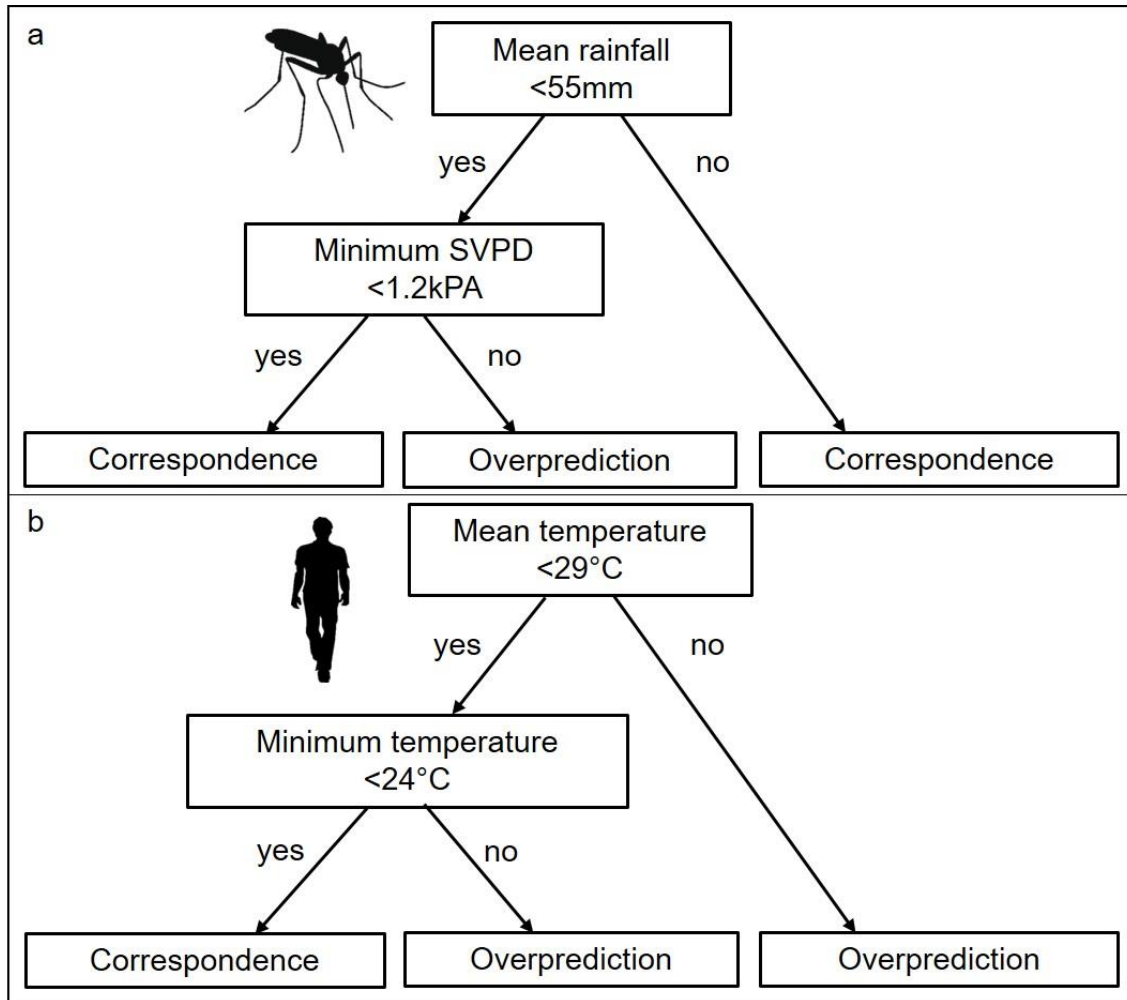

268

269 **Figure 5: High rainfall, humidity, and temperature were associated with the model**  
270 **systematically overpredicting mosquito abundances and arboviral cases.**

271 Classification and regression trees for a) mosquito abundances and b) arboviral cases.

272 Climate conditions represent values within the month prior to a survey. The Saturation

273 Vapor Pressure Deficit (SVPD) is a measure of humidity (see Methods).

274



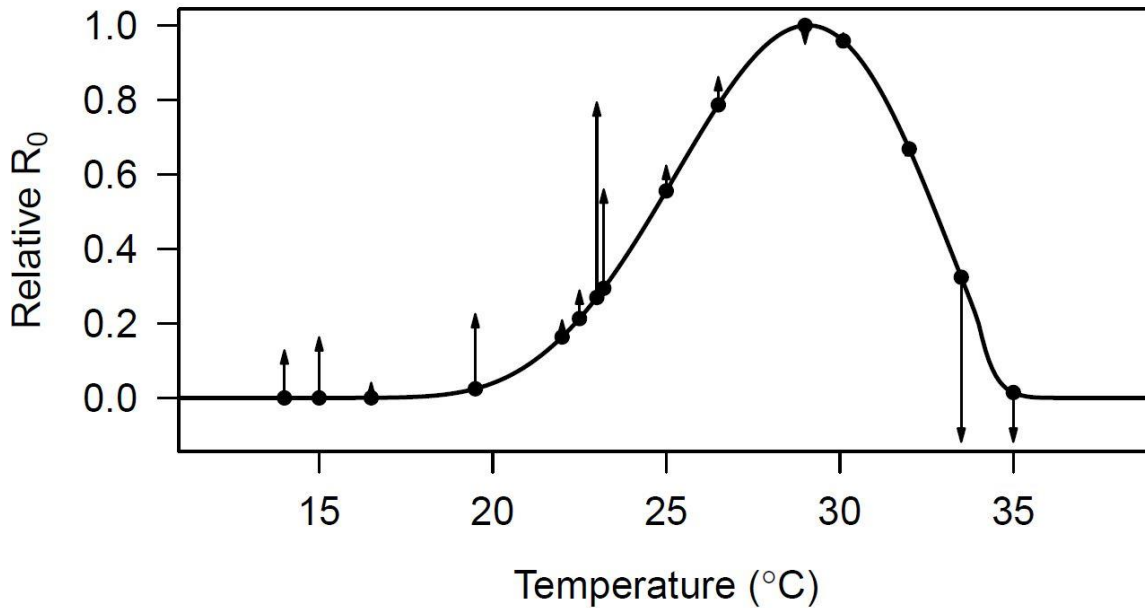

275

276 **Figure 6: Independently predicted relative R<sub>0</sub> from an empirically derived model**  
277 **explains differences in the magnitude and direction of the effects of temperature on**  
278 **dengue transmission across varied settings from previous field studies.** The black line  
279 shows the relative basic reproductive number (R<sub>0</sub>, normalized to a 0-1 scale) plotted  
280 against temperature based on all temperature-dependent traits from [20] used in the SEI-  
281 SEIR model. Points indicate mean temperature values from previous field-based  
282 statistical analyses that related dengue cases with minimum, maximum, or mean ambient  
283 temperature; arrows correspond to the direction (up = positive, down = negative) and  
284 relative effect size of the temperature-dengue relationship based on coefficient values  
285 from studies in Bangladesh, China, Colombia, Guadeloupe, Mexico, Taiwan, Thailand,  
286 and Vietnam [9,10,40–49]. See Methods and Table S3 for more detail. As expected, the  
287 largest observed positive effects of temperature occurred in the rapidly increasing portion  
288 of R<sub>0</sub> curve (~22-25°C) and the largest observed negative effects occurred well above the  
289 predicted optimum, near the upper thermal limit (~33-35°C).

290 **Evaluating the effectiveness of different intervention scenarios**

291 We simulated three intervention strategies at three intensity levels and found that  
292 reducing immature mosquito habitat or contact rate between mosquitoes and humans are  
293 far more effective intervention strategies than reducing adult mosquito abundance (Fig.  
294 7). Even with high intensity intervention efforts that reduce mosquito abundance by 90%  
295 (e.g., spraying large amounts of insecticide), the model indicates that we would expect  
296 only 11% fewer human disease cases (Fig. 7; approximately 12 disease cases per 100,000  
297 population). By contrast, a 10% reduction in immature mosquito habitat (e.g., removing  
298 containers from the environment that create pools of standing water from rain) or contact  
299 rate (e.g., using window screens, mosquito repellent, or wearing protective clothing)  
300 would decrease disease cases by approximately 16% and 19%, respectively (Fig. 7;  
301 approximately 110 and 187 disease cases per 100,000 population, respectively). Higher  
302 intensity efforts that reduce immature mosquito habitat or contact rate by 50% or 90%  
303 provides even greater protection, resulting in predicted decreases in disease cases by as  
304 much as 96% (Fig. 7; approximately 2,087 disease cases per 100,000 population).

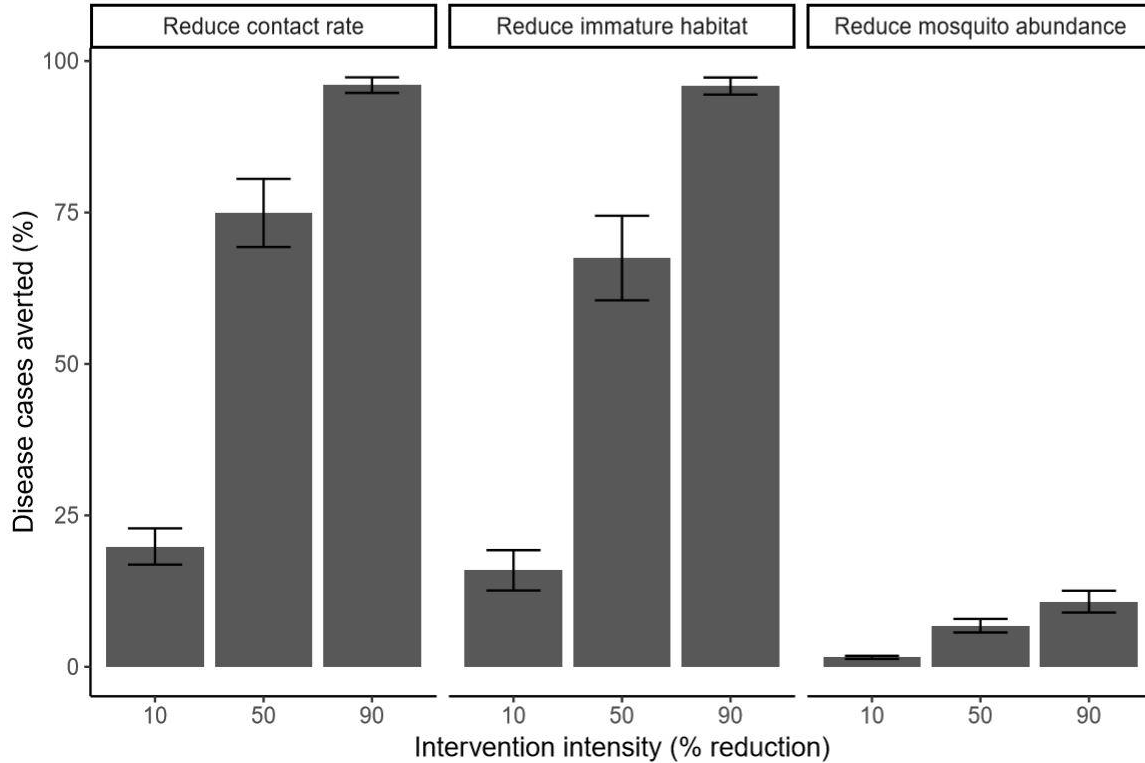

305

306 **Figure 7: Reducing contact rate or immature mosquito habitat leads to the largest**  
307 **reductions in disease cases.** Barplots show the predicted decrease in arboviral cases  
308 across three intervention strategies (reduce contact rate, reduce immature mosquito  
309 habitat, reduce mosquito abundance) and three intervention intensities (10%, 50%, and  
310 90% reductions). Bars indicate the mean across study sites of the difference between the  
311 number of predicted disease cases in a population (e.g., number of cases at one site over a  
312 one-year time period) and the number of predicted disease cases in the same population  
313 and time period given a specific intervention strategy at a specific intensity level). The  
314 error bars indicate the standard error of the mean across all eight study sites.

315

### 316 **Discussion:**

317 Directly observing the influence of climate on species interactions and population  
318 dynamics is often challenging because of interacting and nonlinear relationships; here, we

319 directly and quantitatively connect laboratory-based climate relationships to observed  
320 mosquito and disease dynamics in the field, supporting the mechanistic role of climate in  
321 these disease systems. The trait-based modeling approach helps to reconcile some long-  
322 standing inconsistencies in the literature on the effects of climate on arboviral  
323 transmission dynamics. Temperature, rainfall, and humidity are commonly correlated  
324 with arboviral transmission, but with apparently inconsistent conclusions about which  
325 climate variables best predict disease, in what direction, and at what time lags [3–8]. For  
326 example, some studies indicate that mean temperature best predicts disease [50–54],  
327 while others indicate that minimum temperature [32,45,55,56] or maximum temperature  
328 [7,57–59] are better predictors. Rainfall metrics associated with arboviruses vary widely  
329 as well, from cumulative rainfall [6,42,53,59] to number of rainy days [60,61] to rainfall  
330 rates and thresholds [27,55], and these relationships are difficult to measure in the lab  
331 (but see [25]). Further, time lags between climate conditions and dengue incidence are  
332 variable rather than static: for example, as temperature and daily rainfall increase, the  
333 time lags associated with arboviral incidence decrease [55]. A trait-based model allows  
334 these varying time lags to emerge from the nonlinear dynamics of transmission, rather  
335 than assuming static time lags. Our results highlight that we should not expect the same  
336 climate conditions and lags to be important in all settings, but that their combined,  
337 nonlinear effects can predict disease dynamics across different ecological and socio-  
338 economic settings.

339

340 Understanding the mechanisms that drive disease dynamics can help address two  
341 critically important research priorities: assessing intervention strategies and projecting

342 impacts from climate change on disease dynamics. While phenomenological models  
343 often replicate arboviral disease dynamics remarkably well [62], mechanistic models that  
344 capture mosquito population dynamics and interactions between mosquitoes and humans  
345 will provide more accurate predictions for the effects of different interventions or  
346 projected changes in climate. In this study, we assessed intervention efforts and found  
347 that efforts to reduce immature mosquito habitat or contact rate between mosquitoes and  
348 people should be much more effective than approaches targeted to removing adult  
349 mosquitoes. Further, the intervention simulations suggest that even low and moderate  
350 intervention intensity (10% and 50% reductions) will result in a large percentage of  
351 disease cases averted. These results are promising for supporting integrated disease  
352 control efforts for dengue, chikungunya, and Zika. To help policymakers in Kenya  
353 interpret how these results can guide local intervention efforts, we created a shiny app  
354 based on the SEI-SEIR model (<https://jms5151.shinyapps.io/shiny/>).

355

356 Comparisons between the model predictions and field observations highlighted several  
357 knowledge gaps about climate-disease relationships. While the model generally  
358 reproduced patterns of field observations of mosquitoes and disease cases (based on  
359 correspondence between z-scores) and observations increased and decreased in unison  
360 with the model predictions (based on sign tests), the relative magnitudes only aligned  
361 moderately well (based on Pearson's correlations) and there was significant variation  
362 across sites (based on Table 1 and ANOVA results) indicating that climate may be a  
363 more powerful predictor for differences across a spatial climate gradient (i.e., across  
364 sites) than through time within a site, which supports previous findings [63]. Further, we

365 found evidence that rainfall influences transmission dynamics via its effects on mosquito  
366 carrying capacity. However, incorporating this effect in a dynamic model requires some  
367 knowledge of how humans differentially influence immature mosquito habitat  
368 availability across regions. We show support for three hypothesized relationships  
369 between rainfall and mosquito carrying capacity in the field, indicating that the  
370 relationship between rainfall and immature habitat is highly heterogenous, which has  
371 been found in previous research in Ecuador [28] and Kenya [64]. By examining  
372 conditions where the SEI-SEIR model systematically under- and overpredicted mosquito  
373 abundances and arboviral cases, we identified additional specific climate conditions that  
374 warrant further empirical experimentation. In particular, a variety of traits important for  
375 transmission are not well understood towards the physiologically relevant limits of  
376 temperature [65,66] and humidity [67].

377

378 Future research can build on this study to better predict the location, magnitude, and  
379 timing of arboviral outbreaks and to assess additional intervention strategies. This study  
380 builds on previous mechanistic and semi-mechanistic models [50,61,68–71] by  
381 combining a suite of temperature, rainfall, and humidity dependent trait functions into  
382 one epidemiological model. However, there were several factors that we did not include  
383 in this study, such as existing vector control programs, gradients in land use and land  
384 cover, infrastructure, and preexisting immunity in the population (Table S1). For  
385 instance, in Ecuador, factors such as distance to abandoned properties, interruptions in  
386 access to piped water, shaded patios, and use of vector control are also known to  
387 influence arbovirus transmission [72], whereas in the study sites in Kenya, factors



388 associated with arboviral transmission are less well studied and there are currently no  
389 vector control or local arboviral surveillance programs employed. Future studies could  
390 further improve the model by incorporating human immune dynamics associated with  
391 interactions among different dengue serotypes [73] or cross-reactivity among viral  
392 antibodies [74], differential susceptibility across human age classes [75], and  
393 heterogeneity in contact rates between mosquitoes and people based on human behavior  
394 and movement [50,76]. This study suggests that climate is a key determinant of disease  
395 dynamics via its nonlinear effects on mosquito and pathogen traits, and that those  
396 relationships can be used to predict the timing and locations of disease outbreaks and to  
397 assess intervention strategies. Such mechanistic, climate-driven models will become  
398 increasingly important to support public health efforts in the face of novel climate  
399 regimes emerging due to climate change.

400

#### 401 **Materials and Methods:**

402 Climate data

403 We collected *in situ* measurements of daily mean temperature, relative humidity, and  
404 rainfall at each study site and interpolated missing data where necessary, as described  
405 below. We used temperature and humidity measurements from HOBO loggers and  
406 rainfall measurements from rain gauges for sites in Kenya. We used temperature,  
407 humidity, and rainfall measurements from automatic weather stations operated by the  
408 National Institute of Meteorology and Hydrology in Ecuador. For Kenya, we interpolated  
409 missing temperature data from NOAA Global Surface Summary of the Day (Table S4,  
410 Fig. S2) and interpolated missing rainfall data from NOAA Climate Prediction Center

411 Africa Rainfall Climatology dataset (Table S4, Fig. S3). For Ecuador, we interpolated  
412 missing temperature (Table S4, Fig. S2) and rainfall (Table S4, Fig. S3) data using the  
413 nearest study site where possible and otherwise based on long term mean values for the  
414 corresponding Julian day. To interpolate missing data, we linearly regressed all  
415 measurements taken on the same day in two datasets and then used the linear model to  
416 interpolate temperature for the site with missing data based on the climate measurement  
417 from the secondary source for the date when the data was missing (Fig. S2-3). For  
418 rainfall, we first calculated a moving window of 14-day accumulated rainfall (following  
419 [77]) for each day before interpolation. For both Kenya and Ecuador, we interpolated  
420 missing relative humidity data based on long term mean values for the corresponding  
421 Julian day (Table S4). We then calculated the saturation vapor pressure deficit (SVPD)  
422 from temperature and humidity to use in the humidity function because previous research  
423 suggests SVPD is a more informative measure of the effect of humidity on mosquito  
424 survival compared with relative humidity [67]. To calculate SVPD, we first calculated the  
425 saturation vapor pressure as:

$$SVP = 610.7 * 10^{7.5 * T / (273.3 + T)} \quad (1)$$

426 where ( $T$ ) is temperature in degrees Celsius. We then calculated SVPD (in kilopascals) as

$$SVPD = 1 - \frac{RH}{100} * SVP \quad (2)$$

427 where RH is relative humidity. The final dataset had no missing values for temperature  
428 (Fig. S4), rainfall (Fig. S5), and humidity (Fig. S6).

429

430

431

432 Vector surveys

433 We collected, counted, sexed, and classified mosquitoes by species, and aggregated the  
434 data to mean number of *Aedes aegypti* per house, month, and year to account for  
435 differences in survey effort across months and sites. We collected adult mosquitoes using  
436 Prokopack aspirators [78]. In Ecuador, we collected mosquitoes from approximately 27  
437 houses per site (range = 3-57 houses across four sites) every one-to-two weeks during  
438 three, four-month sampling periods between July 2016 and August 2018 (N = 147  
439 sampling weeks across four sites) to capture different parts of the transmission season.  
440 We aggregated the Ecuador vector data to monthly values (N = 60 site-month  
441 observations) to correspond with the temporal resolution of surveys in Kenya. In Kenya,  
442 we collected mosquitoes from approximately 20 houses per site (range = 1-47 houses  
443 across four sites) every month between January 2014 and October 2018 (N = 217 site-  
444 month observations). In Kenya, we also collected pupae, late instars, and early instars  
445 from containers with standing water around the home and collected eggs by setting  
446 ovitraps for an average of four days in and around each house monthly. We brought  
447 pupae, late and early instars, and eggs to the insectary and reared them to adulthood to  
448 classify individuals by sex and species.

449

450 Arboviral surveys

451 For Ecuador, we analyzed laboratory-confirmed dengue, chikungunya, and Zika cases  
452 provided by the Ministry of Health (MoH) of Ecuador. The MoH collects serum samples  
453 from a subset of people with suspected arbovirus infections, and samples are tested at the  
454 National Public Health Research Institute by molecular diagnostics (RT-PCR) or

455 antibody tests (IgM ELISA for dengue), depending on the number of days of illness.  
456 Results are sent to the MoH Epidemiological Surveillance and Control National  
457 Directorate (SIVE Alerta system). Laboratory-confirmed dengue cases were available for  
458 all four sites from 2014 to 2018. Laboratory-confirmed chikungunya cases were available  
459 for Machala and Huaquillas from 2015 to 2018. Laboratory-confirmed Zika cases were  
460 available for Machala from 2016 to 2018.

461

462 For Kenya, we used laboratory-confirmed dengue cases aggregated by site and month  
463 between 2014 and 2018 collected in a passive surveillance study on childhood febrile  
464 illness in Kenya (NIH R01AI102918, PI: ADL). The study population consisted of 7653  
465 children less than 18 years of age with undifferentiated febrile illness. Children with fever  
466 enrolled in the study when attending outpatient care in one of the four study sites (Mbaka  
467 Oromo Health Centre in Chulaimbo, Obama Children's Hospital in Kisumu, Msambweni  
468 District Hospital in Msambweni, and Ukunda/Diani Health Center in Ukunda). Local  
469 health officers collected comprehensive clinical and demographic data and phlebotomy at  
470 the initial visit. We tested each child's blood for dengue viremia by molecular diagnostics  
471 (conventional PCR [79] or targeted multiplexed real-time PCR when available [80]), or  
472 serologic conversion at a follow up visit (IgG ELISA [81]).

473

474 SEI-SEIR model

475 We adapted an SEI-SEIR model parameterized for dengue transmission in *Ae. aegypti*  
476 mosquitoes [82] (Fig. 2) to simulate mosquito abundance and arboviral cases through  
477 time based on daily weather conditions in eight study locations. The model (equations 3-

478 9), created independently from the observed data described above, allows mosquito life  
 479 history traits and viral development rate to vary with temperature ( $T$ ) following [82],  
 480 mosquito carrying capacity to vary with accumulated 14-day rainfall ( $R$ ) following [77],  
 481 and mosquito mortality to vary with humidity (i.e., saturation vapor pressure deficit) ( $H$ )  
 482 following [67].

$$\frac{dS_m}{dt} = \varphi(T, H) * \frac{1}{\mu(T, H)} * N_m * \left(1 - \frac{N_m}{K(T, R, H)}\right) - \left(a(T) * pMI(T) * \frac{I_h}{N_h} + \mu(T, H)\right) * S_m \quad (3)$$

$$\frac{dE_m}{dt} = a(T) * pMI(T) * \frac{I_h}{N_h} * S_m - (PDR(T) + \mu(T, H)) * E_m \quad (4)$$

$$\frac{dI_m}{dt} = PDR(T) * E_m - \mu(T, H) * I_m \quad (5)$$

$$\frac{dS_h}{dt} = -a(T) * b(T) * \frac{I_m}{N_h} * S_h + BR * S_h - DR * S_h + ie * N_h - ie * S_h \quad (6)$$

$$\frac{dE_h}{dt} = a(T) * b(T) * \frac{I_m}{N_h} * S_h - \delta * E_h - DR * E_h - ie * E_h \quad (7)$$

$$\frac{dI_h}{dt} = \delta * E_h - \eta * I_h - DR * I_h - ie * I_h \quad (8)$$

$$\frac{dR_h}{dt} = \eta * I_h - DR * R_h - ie * R_h \quad (9)$$

483 where

$$\varphi(T, H) = EFD(T) * pEA(T) * MDR(T) \quad (10)$$

484

485 The mosquito population ( $N_m$ ) was separated into susceptible ( $S_m$ ), exposed ( $E_m$ ), and  
 486 infectious ( $I_m$ ) compartments and the human population ( $N_h$ ) was separated into  
 487 susceptible ( $S_h$ ), exposed ( $E_h$ ), infectious ( $I_h$ ), and recovered ( $R_h$ ) compartments (Fig. 2).  
 488 Climate-independent model parameters (Table 3) included the intrinsic incubation period  
 489 ( $\delta$ ), human infectivity period ( $\eta$ ), birth rate ( $BR$ ), death rate ( $DR$ ), and  
 490 immigration/emigration rate ( $ie$ ). The temperature-dependent SEI-SEIR model was  
 491 developed by Huber et al. [82] and allows mosquito life history traits and viral  
 492 development rates to vary according to thermal response curves fit from data derived in

493 laboratory experiments conducted at constant temperatures (Table 4). The temperature-  
 494 dependent traits include eggs laid per female per day ( $EFD$ ), the probability of egg-to-adult  
 495 survival ( $pEA$ ), mosquito development rate ( $MDR$ ), mosquito mortality rate (lifespan<sup>-1</sup>;  $\mu$ ),  
 496 biting rate ( $a$ ), probability of mosquito infection per bite on an infectious host ( $pMI$ ),  
 497 parasite development rate ( $PDR$ ), and probability of mosquito infectiousness given an  
 498 infectious bite ( $b$ ). We modified the mosquito mortality rate equation to vary as a function  
 499 of temperature and humidity by fitting a spline model based on a pooled survival analysis  
 500 of *Ae. aegypti* [67] (Fig. S7):

$$\mu(T, H) = \frac{1}{c * (T - T_0) * (T - T_m)} + (1 - (0.01 + 2.01 * H)) * y \quad H < 1 \quad (11)$$

$$\mu(T, H) = \frac{1}{c * (T - T_0) * (T - T_m)} + (1 - (1.22 + 0.27 * H)) * y \quad H \geq 1 \quad (12)$$

501 where the rate constant ( $c$ ), minimum temperature ( $T_0$ ), and maximum temperature ( $T_m$ )  
 502 equal -1.24, 16.63, and 31.85 respectively (Table 4), humidity ( $H$ ) is the saturation vapor  
 503 pressure deficit, and  $y$  is a scaling factor that we set to 0.005 and 0.01, respectively, to  
 504 restrict mosquito mortality rates within the range of mortality rates estimated by other  
 505 studies [20,67]. The linear humidity function has a steeper slope at lower humidity values  
 506 (equation 11) compared with higher humidity values (equation 12) based on previous  
 507 research [67] (Fig. S7).

508

509 We modeled mosquito carrying capacity,  $K$ , as a modified Arrhenius equation following  
 510 [82,83]:

$$K(T, H, R) = \frac{EFD(T_0) * pEA(T_0) * MDR(T_0) * \mu(T_0, H_0)^{-1} - \mu(T_0, H_0)}{EFD(T_0) * pEA(T_0) * MDR(T_0) * \mu(T_0, H_0)^{-1}} * N_m \quad (12)$$

$$* \frac{-E_A * (T - T_0)^2}{e^{\kappa_B * (T + 273) * (T_0 + 273)}} * f(R)$$



511 with  $T_0$  and  $H_0$  set to the temperature and humidity where carrying capacity is greatest  
512 ( $29^\circ\text{C}$  and  $6\text{ kPa}$ ) and the Boltzmann constant, ( $K_B$ ), is  $8.617 \times 10^{-5}\text{ eV/K}$ . We set the  
513 activation energy,  $E_A$ , as  $0.05$  based on [82]. Since there were no experimental data from  
514 which to derive the functional response of mosquito carrying capacity across a gradient  
515 of rainfall values, we tested several functional relationships based on hypothesized  
516 biological relationships between freshwater availability and immature mosquito breeding  
517 habitat, modeling the effect of rainfall on carrying capacity,  $f(R)$ , as either:

$$f(R_{\text{Brière}}) = c * R * (R - R_{\text{min}}) * \sqrt{(R_{\text{max}} - R)} * y \quad (12)$$

$$f(R_{\text{Quadratic}}) = c * (R - R_{\text{min}}) * (R - R_{\text{max}}) * y \quad (13)$$

$$f(R_{\text{Inverse}}) = \frac{1}{R} \quad (14)$$

518 where minimum rainfall ( $R_{\text{min}}$ ) equaled  $1\text{ mm}$  and maximum rainfall ( $R_{\text{max}}$ ) equaled  $123$   
519  $\text{mm}$  based on the high probability of flushing [27]. The quadratic function is similar to  
520 the rainfall function found in [27] and the inverse function is based on the rainfall  
521 function used in [77]. We used rate constants ( $c$ ) of  $7.86e^{-5}$  and  $-5.99e^{-3}$  for the Brière and  
522 quadratic functions respectively, based on rate constants for other parameters with similar  
523 functional forms (Table 4). We scaled the Brière and quadratic functions by  $y$  ( $0.268$  and  
524  $0.045$ , respectively) so that the maximum carrying capacity was approximately equal  
525 across all three functions.

526

527

528

529 **Table 3: Values of temperature-invariant parameters used in the model.** We derived  
530 daily birth and death rates in the model by dividing the per capita birth and death rates by  
531 360 days. The World Bank Open Data can be found at <https://data.worldbank.org/>.

| Parameter     | Definition                          | Value                              | Source                      |
|---------------|-------------------------------------|------------------------------------|-----------------------------|
| $\delta^{-1}$ | Intrinsic incubation period (days)  | 5.9                                | [82]                        |
| $\eta^{-1}$   | Human infectivity period (days)     | 5.0                                | [82]                        |
| $BR$          | Annual birth rate (per 1000 people) | 31.782 (Ecuador)<br>20.175 (Kenya) | The World Bank<br>Open Data |
| $DR$          | Annual death rate (per 1000 people) | 5.284 (Ecuador)<br>5.121 (Kenya)   | The World Bank<br>Open Data |
| $ie$          | Immigration/emigration rate         | 0.01                               | Expert opinion              |

532

533

534

535

536

537

538

539

540

541

542

543

544

545 **Table 4: Fitted thermal responses for *Ae. aegypti* life history traits.** Traits were fit to a  
 546 Brière [ $cT(T - T_0)(T_m - T)^{\frac{1}{2}}$ ] or a quadratic [ $c(T - T_m)(T - T_0)$ ] function where  $T$   
 547 represents temperature.  $T_0$  and  $T_m$  are the critical thermal minimum and maximum,  
 548 respectively, and  $c$  is the rate constant. Thermal responses were fit by [20] and also used  
 549 in [82]. Parasite development rate was measured as the virus extrinsic incubation rate.

| Trait      | Definition                                                  | Function  | c                       | T <sub>0</sub> | T <sub>m</sub> |
|------------|-------------------------------------------------------------|-----------|-------------------------|----------------|----------------|
| <i>a</i>   | Biting rate (day <sup>-1</sup> )                            | Brière    | 2.71x10 <sup>-04</sup>  | 14.67          | 41.00          |
| <i>EFD</i> | Eggs laid per female per day                                | Brière    | 2.08x10 <sup>-02</sup>  | 14.06          | 32.03          |
| <i>pEA</i> | Probability of mosquito egg-to-adult survival               | Quadratic | -3.36x10 <sup>-03</sup> | 7.68           | 38.31          |
| <i>MDR</i> | Mosquito egg-to-adult development rate (day <sup>-1</sup> ) | Brière    | 1.49x10 <sup>-04</sup>  | 15.12          | 37.67          |
| <i>Lf</i>  | Adult mosquito lifespan (days)                              | Quadratic | -1.24                   | 16.63          | 31.85          |
| <i>b</i>   | Probability of mosquito infectiousness                      | Brière    | 9.86x10 <sup>-04</sup>  | 12.05          | 32.79          |
| <i>pMI</i> | Probability of mosquito infection                           | Brière    | 5.23x10 <sup>-04</sup>  | 1.51           | 34.74          |
| <i>PDR</i> | Parasite development rate (day <sup>-1</sup> )              | Brière    | 1.04x10 <sup>-04</sup>  | 11.50          | 38.97          |

550  
 551 To initiate the model, we used site-specific values for human population size and  
 552 randomly selected one set of values for all sites for the proportion of mosquitoes and  
 553 humans in each compartment. For Ecuador, we used population estimates from official  
 554 population projections produced by Proyección de la Población Ecuatoriana, por años  
 555 calendario, según cantones 2010-2020  
 556 (<https://www.ecuadorencifras.gob.ec/proyecciones-poblacionales/>) with population sizes  
 557 of 57,366, 279,887, 13,673, and 25,615 for Huaquillas, Machala, Portovelo, and Zaruma,  
 558 respectively, based on 2017 projections. For Kenya, we estimated the population sizes

559 served by each outpatient care facility by creating a polygon around all the geolocations  
560 of study participants' homes enrolled at each outpatient care facility and summed  
561 population count data from NASA's Socioeconomic Data and Applications Center  
562 Gridded Population of the World v4 (<https://doi.org/10.7927/H4JW8BX5>) within each  
563 polygon using ArcGIS v 10.4.1. We estimated population sizes of 7,304, 547,557,  
564 240,698, and 154,048 for Chulaimbo, Kisumu, Msambweni, and Ukunda respectively.  
565 We used the following values as the initial proportion of mosquitoes and humans in each  
566 model compartment:  $S_m = 0.22$ ,  $E_m = 0.29$ ,  $I_m = 0.49$ ,  $S_h = 0.58$ ,  $E_h = 0.22$ ,  $I_h = 0.00$ , and  
567  $R_h = 0.20$ . We determined that the model was invariant to initial proportion values after a  
568 short burn-in period (90 days) based on a sensitivity analysis (Fig. S8).

569

570 We ran all model simulations using the deSolve package in R statistical software v 3.5.3.  
571 Model codes is available at [https://github.com/jms5151/SEI-SEIR\\_Arboviruses](https://github.com/jms5151/SEI-SEIR_Arboviruses).

572

573 Model validation

574 To validate the SEI-SEIR model, we quantified the relationships between predicted and  
575 observed mosquitoes and laboratory-confirmed disease cases by comparing z-score  
576 values, Pearson's correlations, sign tests, and Analysis of Variance (ANOVAs). To  
577 determine whether there was overall correspondence between model predictions and  
578 field-collected observations of *Aedes aegypti* abundances (N = 277 site-months) and  
579 laboratory-confirmed arboviral incidence (N = 388 site-months), we categorized  
580 observations of mosquito abundance or disease cases as corresponding to the model  
581 predictions if the observation fell within one standard deviation above or below the

582 prediction (using z-scores of observations and predictions), overpredicted if the  
583 observations were below one standard deviation below the prediction, and underpredicted  
584 if the observations were above one standard deviation above the prediction. To assess the  
585 correlation of individual survey points through time within sites, we calculated Pearson's  
586 correlation coefficient,  $r$ , between model predictions of observations using the `cor`  
587 function in base R, excluding missing data. To determine whether the model predicted  
588 directional trends in the dynamics, we determined whether model predictions and  
589 observations increased and decreased in unison by first calculating the number of time  
590 points between surveys where predictions and observations of mosquito abundances or  
591 disease cases synchronously increased, decreased, or stayed constant between surveys  
592 and then used the number of time points in agreement and the total number of time points  
593 in a two-tailed exact sign test using the `binom.test` function in R. To test whether climate  
594 effects were more important for determining differences across sites or whether climate  
595 was differentially predictive in some sites over others, we calculated the yearly  
596 percentage of mosquito and disease case observations predicted by the model and used  
597 those site-year values in a one-way ANOVA using the `aov` function in R.

598

599 CART model

600 To investigate conditions where the model systematically over- or underpredicted  
601 mosquito abundances and arboviral cases, we used classification and regression tree  
602 (CART) models. For each CART model, we used the three correspondence categories  
603 (corresponded, overpredicted, underpredicted) as the response variable and a suite of  
604 predictor variables. The predictor variables included site (proxy for socioeconomic status

605 and potential prior exposure to disease), country (proxy for genetic, cultural, healthcare,  
606 and infrastructure differences), urban/rural, inland/coastal, and climate conditions in the  
607 month prior to each survey, a time interval commonly associated with arboviral  
608 transmission [6,42,53]. The climate conditions we investigated in the month prior to each  
609 survey were minimum, maximum, mean, and variance of daily temperature and humidity  
610 and 14-day cumulative rainfall. We conducted the CART analysis using the rpart package  
611 in R.

612

### 613 Comparison of $R_0$ with prior studies

614 We collected effect sizes of temperature on dengue incidence from 12 peer-reviewed  
615 studies from the literature (Table S3). We selected studies with mean temperatures across  
616 the predicted temperature range where arboviral transmission can occur. We scaled the  
617 coefficient values to visualize the relative effect of temperature across studies given that  
618 the original analyses were conducted with different temperature metrics and across  
619 different temperature ranges. We provide additional information and sources in Table S3.

620

### 621 Intervention simulations

622 We simulated different intervention strategies by adapting the SEI-SEIR model and  
623 simulating disease cases over a one-year time period. We simulated three intervention  
624 strategies (reducing contact rate between mosquitoes and humans, reducing immature  
625 mosquito habitat, and reducing mosquito abundance) at three intensity levels (10%, 50%,  
626 and 90% reduction). Each of these simulation strategies preserves the temperature-,  
627 rainfall-, and humidity-dependence of each parameter but modifies the magnitude of one

628 or more parameters. To simulate a reduction in contact rate, we multiplied the mosquito  
629 biting rate,  $a$ , by 0.10, 0.50, or 0.90. To simulate a reduction in immature mosquito  
630 habitat, we multiplied the carrying capacity function equation,  $K$  (equation 12), by 0.10,  
631 0.50, or 0.90. To simulate a reduction in mosquito abundance, we reduced the proportion  
632 of mosquitoes in the susceptible, exposed, and infectious compartments by 0.10, 0.50, or  
633 0.90. In contrast to the first two interventions that are considered relatively “static” (e.g.,  
634 adding screens to windows will consistently reduce contact rate), the third intervention  
635 represents an activity that is labor intensive and is applied at a single time point (e.g.,  
636 spraying insecticide). Therefore, for the third intervention, we ran simulations where the  
637 intervention occurred once a year and we varied the timing of the intervention by month  
638 (e.g., 12 simulations per intensity level).

639

640 **Acknowledgements:** JMC, ADL, EFL, and EAM were supported by a Stanford Woods  
641 Institute for the Environment – Environmental Ventures Program grant (PIs: EAM, ADL,  
642 and EFL). EAM was also supported by a Hellman Faculty Fellowship and a Terman  
643 Award. ADL, BAN, FMM, ENGS, MSS, ARK, RD, AA, and HNN were supported by a  
644 National Institutes of Health R01 grant (AI102918; PI: ADL). EAM, AMSI, and SJR  
645 were supported by a National Science Foundation Ecology and Evolution of Infectious  
646 Diseases grant (DEB-1518681) and AMSI and SJR were also supported by an NSF DEB  
647 RAPID grant (1641145). EAM was supported by a National Institute of General Medical  
648 Sciences Maximizing Investigators’ Research Award grant (1R35GM133439-01).

649



650 **Author contributions:** EAM, ADL, EFL, and JMC conceived of project. JMC  
651 conducted analyses and wrote manuscript. EAM, ADL, EFL, and AMSI secured funding  
652 for the project. BNN, FMM, EBA, AA, MJBC, RD, FHH, RM, and HNN collected data.  
653 ENGS and MMS conducted laboratory analyses. ARK, SJR, and RS processed data. All  
654 authors revised and approved of the manuscript.

655

656 **References:**

- 657 1. Ockendon N, Baker DJ, Carr JA, White EC, Almond REA, Amano T, et al.  
658 Mechanisms underpinning climatic impacts on natural populations: altered species  
659 interactions are more important than direct effects. *Glob Chang Biol.* 2014;20:  
660 2221–2229. doi:10.1111/gcb.12559
- 661 2. Boggs CL, Inouye DW. A single climate driver has direct and indirect effects on  
662 insect population dynamics. *Ecol Lett.* 2012;15: 502–508. doi:10.1111/j.1461-  
663 0248.2012.01766.x
- 664 3. Jury MR. Climate influence on dengue epidemics in Puerto Rico. *Int J Environ*  
665 *Health Res.* 2008;18: 323–334. doi:10.1080/09603120701849836
- 666 4. Campbell KM, Haldeman K, Lehnig C, Munayco C V., Halsey ES, Laguna-Torres  
667 VA, et al. Weather Regulates Location, Timing, and Intensity of Dengue Virus  
668 Transmission between Humans and Mosquitoes. *PLoS Negl Trop Dis.* 2015;9:  
669 e0003957. doi:10.1371/journal.pntd.0003957
- 670 5. Adde A, Roucou P, Mangeas M, Ardillon V, Desenclos J-C, Rousset D, et al.  
671 Predicting Dengue Fever Outbreaks in French Guiana Using Climate Indicators.  
672 *PLoS Negl Trop Dis.* 2016;10: e0004681. doi:10.1371/journal.pntd.0004681

- 673 6. Dhimal M, Gautam I, Joshi HD, O’Hara RB, Ahrens B, Kuch U, et al. Risk  
674 Factors for the Presence of Chikungunya and Dengue Vectors (*Aedes aegypti* and  
675 *Aedes albopictus*), Their Altitudinal Distribution and Climatic Determinants of  
676 Their Abundance in Central Nepal. *PLoS Negl Trop Dis*. 2015;9: e0003545.  
677 doi:10.1371/journal.pntd.0003545
- 678 7. Descloux E, Mangeas M, Menkes CE, Lengaigne M, Leroy A, Tehei T, et al.  
679 Climate-Based Models for Understanding and Forecasting Dengue Epidemics.  
680 *PLoS Negl Trop Dis*. 2012;6: e1470. doi:10.1371/journal.pntd.0001470
- 681 8. Aswi A, Cramb SM, Moraga P, Mengersen K. *Epidemiology and Infection*  
682 Bayesian spatial and spatio-temporal approaches to modelling dengue fever: a  
683 systematic review. *Epidemiol Infect*. 2018;147. doi:10.1017/S0950268818002807
- 684 9. Hurtado-Daz M, Riojas-Rodriguez H, Rothenberg S, Gomez-Dantes H, Cifuentes  
685 E. Impact of climate variability on the incidence of dengue in Mexico. *Trop Med*  
686 *Int Heal*. 2007;12. doi:10.1111/j.1365-3156.2007.01930.x
- 687 10. Nakhapakorn K, Tripathi N. An information value based analysis of physical and  
688 climatic factors affecting dengue fever and dengue haemorrhagic fever incidence.  
689 *Int J Health Geogr*. 2005;4: 13. doi:10.1186/1476-072X-4-13
- 690 11. Messina JP, Brady OJ, Scott TW, Zou C, Pigott DM, Duda KA, et al. Global  
691 spread of dengue virus types: mapping the 70 year history. *Trends Microbiol*.  
692 2014;22: 138–146. doi:10.1016/j.tim.2013.12.011
- 693 12. Wilke AB, Beier JC, Benelli G. Complexity of the relationship between global  
694 warming and urbanization – an obscure future for predicting increases in vector-  
695 borne infectious diseases. *Curr Opin Insect Sci*. 2019;35: 1–9.

- 696 doi:10.1016/J.COIS.2019.06.002
- 697 13. Campbell LP, Luther C, Moo-Llanes D, Ramsey JM, Danis-Lozano R, Peterson  
698 AT. Climate change influences on global distributions of dengue and chikungunya  
699 virus vectors. *Philos Trans R Soc B Biol Sci. The Royal Society*; 2015;370:  
700 20140135–20140135. doi:10.1098/rstb.2014.0135
- 701 14. Messina JP, Brady OJ, Golding N, Kraemer MUG, Wint GRW, Ray SE, et al. The  
702 current and future global distribution and population at risk of dengue. *Nat*  
703 *Microbiol.* 2019; 1. doi:10.1038/s41564-019-0476-8
- 704 15. Achee NL, Gould F, Perkins TA, Reiner RC, Morrison AC, Ritchie SA, et al. A  
705 Critical Assessment of Vector Control for Dengue Prevention. *PLoS Neglected*  
706 *Tropical Diseases.* 2015. doi:10.1371/journal.pntd.0003655
- 707 16. Michael E, Singh BK, Mayala BK, Smith ME, Hampton S, Nabrzyski J.  
708 Continental-scale, data-driven predictive assessment of eliminating the vector-  
709 borne disease, lymphatic filariasis, in sub-Saharan Africa by 2020. *BMC Med.*  
710 2017;15: 176. doi:10.1186/s12916-017-0933-2
- 711 17. Smith T, Maire N, Ross A, Penny M, Chitnis N, Schapira A, et al. Towards a  
712 comprehensive simulation model of malaria epidemiology and control.  
713 *Parasitology.* 2008. pp. 1507–1516. doi:10.1017/S0031182008000371
- 714 18. Kraemer MU, Sinka ME, Duda KA, Mylne AQ, Shearer FM, Barker CM, et al.  
715 The global distribution of the arbovirus vectors *Aedes aegypti* and *Ae. albopictus*.  
716 *Elife.* 2015;4. doi:10.7554/eLife.08347
- 717 19. Powell JR, Tabachnick WJ, Powell JR, Tabachnick WJ. History of domestication  
718 and spread of *Aedes aegypti* - A Review. *Mem Inst Oswaldo Cruz. Fundação*

- 719 Oswaldo Cruz; 2013;108: 11–17. doi:10.1590/0074-0276130395
- 720 20. Mordecai EA, Cohen JM, Evans M V., Gudapati P, Johnson LR, Lippi CA, et al.  
721 Detecting the impact of temperature on transmission of Zika, dengue, and  
722 chikungunya using mechanistic models. PLoS Negl Trop Dis. 2017;11: e0005568.  
723 doi:10.1371/journal.pntd.0005568
- 724 21. Shocket MS, Ryan SJ, Mordecai EA. Temperature explains broad patterns of Ross  
725 River virus transmission. Elife. 2018; doi:10.7554/eLife.37762.001
- 726 22. Paull SH, Horton DE, Ashfaq M, Rastogi D, Kramer LD, Diffenbaugh NS, et al.  
727 Drought and immunity determine the intensity of West Nile virus epidemics and  
728 climate change impacts. Proc R Soc B Biol Sci. 2017;284: 20162078.  
729 doi:10.1098/rspb.2016.2078
- 730 23. Costa EAP de A, Santos EM de M, Correia JC, Albuquerque CMR de. Impact of  
731 small variations in temperature and humidity on the reproductive activity and  
732 survival of *Aedes aegypti* (Diptera, Culicidae). Rev Bras Entomol. 2010;54: 488–  
733 493. doi:10.1590/S0085-56262010000300021
- 734 24. Gaaboub IA, El-Sawaf SK, El-Latif MA. Effect of Different Relative Humidities  
735 and Temperatures on Egg-Production and Longevity of Adults of *Anopheles*  
736 (*Myzomyia*) *pharoensis* Theob.1. Zeitschrift für Angew Entomol. 2009;67: 88–94.  
737 doi:10.1111/j.1439-0418.1971.tb02098.x
- 738 25. Koenraadt CJM, Harrington LC. Flushing Effect of Rain on Container-Inhabiting  
739 Mosquitoes *Aedes aegypti* and *Culex pipiens* (Diptera: Culicidae). J Med Entomol.  
740 2009;45: 28–35. doi:10.1603/0022-2585(2008)45[28:FEOROC]2.0.CO;2
- 741 26. Paaijmans KP, Wandago MO, Githeko AK, Takken W, Vulule J. Unexpected High

- 742           Losses of *Anopheles gambiae* Larvae Due to Rainfall. *PLoS One*. 2007;2: e1146.  
743           doi:10.1371/journal.pone.0001146
- 744   27.   Benedum CM, Seidahmed OME, Eltahir EAB, Markuzon N. Statistical modeling  
745           of the effect of rainfall flushing on dengue transmission in Singapore. *PLoS Negl*  
746           *Trop Dis*. 2018;12: e0006935. doi:10.1371/journal.pntd.0006935
- 747   28.   Stewart Ibarra AM, Ryan SJ, Beltrán E, Mejía R, Silva M, Muñoz Á. Dengue  
748           Vector Dynamics (*Aedes aegypti*) Influenced by Climate and Social Factors in  
749           Ecuador: Implications for Targeted Control. *PLoS One*. 2013;8: e78263.  
750           doi:10.1371/journal.pone.0078263
- 751   29.   Pontes RJ, Spielman A, Oliveira-Lima JW, Hodgson JC, Freeman J. Vector  
752           densities that potentiate dengue outbreaks in a Brazilian city. *Am J Trop Med Hyg*.  
753           2000;62: 378–383. doi:10.4269/ajtmh.2000.62.378
- 754   30.   Anyamba A, Linthicum KJ, Small JL, Collins KM, Tucker CJ, Pak EW, et al.  
755           Climate Teleconnections and Recent Patterns of Human and Animal Disease  
756           Outbreaks. *PLoS Negl Trop Dis*. 2012;6: e1465. doi:10.1371/journal.pntd.0001465
- 757   31.   Stewart-Ibarra AM, Lowe R. Climate and Non-Climate Drivers of Dengue  
758           Epidemics in Southern Coastal Ecuador. *Am J Trop Med Hyg*. 2013;88: 971–981.  
759           doi:10.4269/ajtmh.12-0478
- 760   32.   Stewart-Ibarra AM, Muñoz ÁG, Ryan SJ, Ayala EB, Borbor-Cordova MJ,  
761           Finkelstein JL, et al. Spatiotemporal clustering, climate periodicity, and social-  
762           ecological risk factors for dengue during an outbreak in Machala, Ecuador, in  
763           2010. *BMC Infect Dis*. 2014;14: 610. doi:10.1186/s12879-014-0610-4
- 764   33.   Agha SB, Tchouassi DP, Turell MJ, Bastos ADS, Sang R. Entomological

- 765 assessment of dengue virus transmission risk in three urban areas of Kenya. *PLoS*  
766 *Negl Trop Dis.* 2019;13: e0007686. doi:10.1371/journal.pntd.0007686
- 767 34. Agha SB, Tchouassi DP, Bastos ADS, Sang R. Dengue and yellow fever virus  
768 vectors: seasonal abundance, diversity and resting preferences in three Kenyan  
769 cities. *Parasit Vectors.* 2017;10: 628. doi:10.1186/s13071-017-2598-2
- 770 35. Chretien J-P, Anyamba A, Bedno SA, Breiman RF, Sang R, Sergon K, et al.  
771 Drought-Associated Chikungunya Emergence Along Coastal East Africa. *Am J*  
772 *Trop Med Hyg.* 2007;76: 405–407. doi:10.4269/ajtmh.2007.76.405
- 773 36. Hortion J, Mutuku FM, Eyherabide AL, Vu DM, Boothroyd DB, Grossi-Soyster  
774 EN, et al. Acute Flavivirus and Alphavirus Infections among Children in Two  
775 Different Areas of Kenya, 2015. *Am J Trop Med Hyg.* 2019;100: 170–173.  
776 doi:10.4269/ajtmh.18-0297
- 777 37. Vu DM, Mutai N, Heath CJ, Vulule JM, Mutuku FM, Ndenga BA, et al.  
778 Unrecognized Dengue Virus Infections in Children, Western Kenya, 2014-2015.  
779 *Emerg Infect Dis.* 2017;23: 1915–1917. doi:10.3201/eid2311.170807
- 780 38. Gubler DJ, Nalim S, Saroso JS, Saipan H, Tan R. Variation in Susceptibility to  
781 Oral Infection with Dengue Viruses among Geographic Strains of *Aedes Aegypti*  
782 \*. *Am J Trop Med Hyg.* 1979;28: 1045–1052. doi:10.4269/ajtmh.1979.28.1045
- 783 39. Xavier-Carvalho C, Chester Cardoso C, de Souza Kehdya F, Guilherme Pacheco  
784 A, Ozório Moraes M. Host genetics and dengue fever. *Infect Genet Evol.*  
785 2017;56: 99–110. doi:10.1016/J.MEEGID.2017.11.009
- 786 40. Sriprom M, Chalvet-Monfray K, Chaimane T, Vongsawat K, Bicout DJ. Monthly  
787 district level risk of dengue occurrences in Sakon Nakhon Province, Thailand. *Sci*

- 788 Total Environ. 2010;408: 5521–5528. doi:10.1016/J.SCITOTENV.2010.08.024
- 789 41. Martínez-Bello D, López-Quílez A, Prieto AT. Spatiotemporal modeling of  
790 relative risk of dengue disease in Colombia. *Stoch Environ Res Risk Assess.*  
791 2018;32: 1587–1601. doi:10.1007/s00477-017-1461-5
- 792 42. Colón-González FJ, Bentham G, Lake IR. Climate Variability and Dengue Fever  
793 in Warm and Humid Mexico. *Am J Trop Med Hyg.* 2011;84: 757–763.  
794 doi:10.4269/ajtmh.2011.10-0609
- 795 43. Wang C, Jiang B, Fan J, Wang F, Liu Q. A Study of the Dengue Epidemic and  
796 Meteorological Factors in Guangzhou, China, by Using a Zero-Inflated Poisson  
797 Regression Model. *Asia Pacific J Public Heal.* 2014;26: 48–57.  
798 doi:10.1177/1010539513490195
- 799 44. Minh An DT, Rocklöv J. Epidemiology of dengue fever in Hanoi from 2002 to  
800 2010 and its meteorological determinants. *Glob Health Action.* 2014;7: 23074.  
801 doi:10.3402/gha.v7.23074
- 802 45. Laureano-Rosario AE, Garcia-Rejon JE, Gomez-Carro S, Farfan-Ale JA, Muller-  
803 Kargera FE. Modelling dengue fever risk in the State of Yucatan, Mexico using  
804 regional-scale satellite-derived sea surface temperature. *Acta Trop.* 2017;172: 50–  
805 57. doi:10.1016/j.actatropica.2017.04.017
- 806 46. Wu P-C, Guoa H-R, Lung S-C, Lin C-Y, Su H-J. Weather as an effective predictor  
807 for occurrence of dengue fever in Taiwan. *Acta Trop.* 2007;103: 50–57.  
808 doi:10.1016/j.actatropica.2007.05.014
- 809 47. Karim MN, Munshi SU, Anwar N, Alam MS. Climatic factors influencing dengue  
810 cases in Dhaka city: a model for dengue prediction. *Indian J Med Res.* 2012;136:



- 811 32–9. Available: <http://www.ncbi.nlm.nih.gov/pubmed/22885261>
- 812 48. Gharbi M, Quenel P, Gustave J, Cassadou S, Ruche G La, Girdary L, et al. Time  
813 series analysis of dengue incidence in Guadeloupe, French West Indies:  
814 Forecasting models using climate variables as predictors. *BMC Infect Dis.*  
815 2011;11: 166. doi:10.1186/1471-2334-11-166
- 816 49. Sharmin S, Glass K, Viennet E, Harley D. Interaction of Mean Temperature and  
817 Daily Fluctuation Influences Dengue Incidence in Dhaka, Bangladesh. *PLoS Negl*  
818 *Trop Dis.* 2015;9: e0003901. doi:10.1371/journal.pntd.0003901
- 819 50. Wesolowski A, Qureshi T, Boni MF, Sundsøy PR, Johansson MA, Rasheed SB, et  
820 al. Impact of human mobility on the emergence of dengue epidemics in Pakistan.  
821 *Proc Natl Acad Sci. National Academy of Sciences;* 2015;112: 11887–11892.  
822 doi:10.1073/pnas.1504964112
- 823 51. Morin CW, Monaghan AJ, Hayden MH, Barrera R, Ernst K. Meteorologically  
824 Driven Simulations of Dengue Epidemics in San Juan, PR. *PLoS Negl Trop Dis.*  
825 2015;9: e0004002. doi:10.1371/journal.pntd.0004002
- 826 52. Chowell G, Cazelles B, Broutin H, Munayco C V. The influence of geographic  
827 and climate factors on the timing of dengue epidemics in Perú, 1994-2008. *BMC*  
828 *Infect Dis.* 2011;11: 164. doi:10.1186/1471-2334-11-164
- 829 53. Johansson MA, Dominici F, Glass GE. Local and Global Effects of Climate on  
830 Dengue Transmission in Puerto Rico. *PLoS Negl Trop Dis.* 2009;3: e382.  
831 doi:10.1371/journal.pntd.0000382
- 832 54. Earnest A, Tan SB, Wilder-Smith A. Meteorological factors and El Niño Southern  
833 Oscillation are independently associated with dengue infections. *Epidemiol Infect.*

- 834 2012;140: 1244–1251. doi:10.1017/s095026881100183x
- 835 55. Chien L-C, Yu H-L. Impact of meteorological factors on the spatiotemporal  
836 patterns of dengue fever incidence. *Environ Int.* Pergamon; 2014;73: 46–56.  
837 doi:10.1016/J.ENVINT.2014.06.018
- 838 56. Wijayanti SPM, Porphyre T, Chase-Topping M, Rainey SM, McFarlane M,  
839 Schnettler E, et al. The Importance of Socio-Economic Versus Environmental Risk  
840 Factors for Reported Dengue Cases in Java, Indonesia. *PLoS Negl Trop Dis.*  
841 2016;10: e0004964. doi:10.1371/journal.pntd.0004964
- 842 57. Hu W, Clements A, Williams G, Tong S. Dengue fever and El Nino/Southern  
843 Oscillation in Queensland, Australia: a time series predictive model. *Occup*  
844 *Environ Med.* 2010;67: 307–11. doi:10.1136/oem.2008.044966
- 845 58. Chen S-C, Hsieh M-H. Modeling the transmission dynamics of dengue fever:  
846 Implications of temperature effects. *Sci Total Environ.* 2012;431: 385–391.  
847 doi:10.1016/J.SCITOTENV.2012.05.012
- 848 59. Pinto E, Coelho M, Oliver L, Massad E. The influence of climate variables on  
849 dengue in Singapore. *Int J Environ Health Res.* 2011;21: 415–426.  
850 doi:10.1080/09603123.2011.572279
- 851 60. Xu L, Stige LC, Chan K-S, Zhou J, Yang J, Sang S, et al. Climate variation drives  
852 dengue dynamics. *Proc Natl Acad Sci U S A.* 2017;114: 113–118.  
853 doi:10.1073/pnas.1618558114
- 854 61. Li R, Xu L, Bjørnstad ON, Liu K, Song T, Chen A, et al. Climate-driven variation  
855 in mosquito density predicts the spatiotemporal dynamics of dengue. *Proc Natl*  
856 *Acad Sci.* 2019;119: 3624–3629. doi:10.1073/PNAS.1806094116

- 857 62. Johansson MA, Apfeldorf KM, Dobson S, Devita J, Buczak AL, Baugher B, et al.  
858 An open challenge to advance probabilistic forecasting for dengue epidemics. Proc  
859 Natl Acad Sci. 2019; 201909865. doi:10.1073/pnas.1909865116
- 860 63. Harris M, Caldwell JM, Mordecai EA. Climate drives spatial variation in Zika  
861 epidemics in Latin America. Proc R Soc B Biol Sci. 2019;286.  
862 doi:10.1098/rspb.2019.1578
- 863 64. Ngugi HN, Mutuku FM, Ndenga BA, Musunzaji PS, Mbakaya JO, Aswani P, et al.  
864 Characterization and productivity profiles of *Aedes aegypti* (L.) breeding habitats  
865 across rural and urban landscapes in western and coastal Kenya. Parasit Vectors.  
866 2017;10: 331. doi:10.1186/s13071-017-2271-9
- 867 65. Waite JL, Suh E, Lynch PA, Thomas MB. Exploring the lower thermal limits for  
868 development of the human malaria parasite, *Plasmodium falciparum*. Biol Lett.  
869 2019;15: 20190275. doi:10.1098/rsbl.2019.0275
- 870 66. Mordecai EA, Caldwell JM, Grossman MK, Lippi CA, Johnson LR, Neira M, et  
871 al. Thermal biology of mosquito-borne disease. Byers J (Jeb), editor. Ecol Lett.  
872 2019; ele.13335. doi:10.1111/ele.13335
- 873 67. Schmidt CA, Comeau G, Monaghan AJ, Williamson DJ, Ernst KC. Effects of  
874 desiccation stress on adult female longevity in *Aedes aegypti* and *Ae. albopictus*  
875 (Diptera: Culicidae): results of a systematic review and pooled survival analysis.  
876 Parasit Vectors. 2018;11: 267. doi:10.1186/s13071-018-2808-6
- 877 68. Wang X, Tang S, Cheke RA. A stage structured mosquito model incorporating  
878 effects of precipitation and daily temperature fluctuations. J Theor Biol. 2016;411:  
879 27–36. doi:10.1016/j.jtbi.2016.09.015

- 880 69. Yang HM, Macoris MLG, Galvani KC, Andrighetti MTM, Wanderley DM V.  
881 Assessing the effects of temperature on the population of *Aedes aegypti*, the  
882 vector of dengue. *Epidemiol Infect.* 2009;137: 1188–1202.  
883 doi:10.1017/S0950268809002040
- 884 70. Siraj AS, Oidtman RJ, Huber JH, Kraemer MUG, Brady OJ, Johansson MA, et al.  
885 Temperature modulates dengue virus epidemic growth rates through its effects on  
886 reproduction numbers and generation intervals. *PLoS Negl Trop Dis.* 2017;11:  
887 e0005797. doi:10.1371/journal.pntd.0005797
- 888 71. Oidtman RJ, Lai S, Huang Z, Yang J, Siraj AS, Reiner RC, et al. Inter-annual  
889 variation in seasonal dengue epidemics driven by multiple interacting factors in  
890 Guangzhou, China. *Nat Commun.* 2019;10. doi:10.1038/s41467-019-09035-x
- 891 72. Kenneson A, Beltrán-Ayala E, Borbor-Cordova MJ, Polhemus ME, Ryan SJ, Endy  
892 TP, et al. Social-ecological factors and preventive actions decrease the risk of  
893 dengue infection at the household-level: Results from a prospective dengue  
894 surveillance study in Machala, Ecuador. *PLoS Negl Trop Dis.* 2017;11: e0006150.  
895 doi:10.1371/journal.pntd.0006150
- 896 73. Reich NG, Shrestha S, King AA, Rohani P, Lessler J, Kalayanarooj S, et al.  
897 Interactions between serotypes of dengue highlight epidemiological impact of  
898 cross-immunity. *J R Soc Interface.* 2013;10: 20130414.  
899 doi:10.1098/rsif.2013.0414
- 900 74. Wen J, Elong Ngono A, Regla-Nava JA, Kim K, Gorman MJ, Diamond MS, et al.  
901 Dengue virus-reactive CD8+ T cells mediate cross-protection against subsequent  
902 Zika virus challenge. *Nat Commun.* 2017;8: 1459. doi:10.1038/s41467-017-

- 903           01669-z
- 904   75.   Rodriguez-Barraquer I, Salje H, Cummings DA. Opportunities for improved  
905           surveillance and control of dengue from age-specific case data. *Elife*. 2019;8.  
906           doi:10.7554/eLife.45474
- 907   76.   Stoddard ST, Forshey BM, Morrison AC, Paz-Soldan VA, Vazquez-Prokopec  
908           GM, Astete H, et al. House-to-house human movement drives dengue virus  
909           transmission. *Proc Natl Acad Sci* 2013;110: 994–999.  
910           doi:10.1073/pnas.1213349110
- 911   77.   Vaidya A, Bravo-Salgado AD, Mikler AR. Modeling climate-dependent  
912           population dynamics of mosquitoes to guide public health policies. *Proc 5th ACM*  
913           *Conf Bioinformatics* 2014; 380–389. doi:10.1145/2649387.2649415
- 914   78.   Vazquez-Prokopec GM, Galvin WA, Kelly R, Kitron U. A New, Cost-Effective,  
915           Battery-Powered Aspirator for Adult Mosquito Collections. *J Med Entomol*.  
916           2009;46: 1256–1259. doi:10.1603/033.046.0602
- 917   79.   Waggoner JJ, Gresh L, Mohamed-Hadley A, Ballesteros G, Davila MJV, Tellez Y,  
918           et al. Single-Reaction Multiplex Reverse Transcription PCR for Detection of Zika,  
919           Chikungunya, and Dengue Viruses. *Emerg Infect Dis*. 2016;22: 1295–7.  
920           doi:10.3201/eid2207.160326
- 921   80.   Lanciotti RS, Calisher CH, Gubler DJ, Chang GJ, Vorndam A V. Rapid detection  
922           and typing of dengue viruses from clinical samples by using reverse transcriptase-  
923           polymerase chain reaction. *J Clin Microbiol*. 1992;30: 545–51. Available:  
924           <http://www.ncbi.nlm.nih.gov/pubmed/1372617>
- 925   81.   Grossi-Soyster EN, Cook EAJ, de Glanville WA, Thomas LF, Krystosik AR, Lee

- 926 J, et al. Serological and spatial analysis of alphavirus and flavivirus prevalence and  
927 risk factors in a rural community in western Kenya. *PLoS Negl Trop Dis*. 2017;11:  
928 e0005998. doi:10.1371/journal.pntd.0005998
- 929 82. Huber JH, Childs ML, Caldwell JM, Mordecai EA. Seasonal temperature variation  
930 influences climate suitability for dengue, chikungunya, and Zika transmission.  
931 *PLoS Negl Trop Dis*. 2018;12: e0006451. doi:10.1371/journal.pntd.0006451
- 932 83. Palamara GM, Childs DZ, Clements CF, Petchey OL, Plebani M, Smith MJ.  
933 Inferring the temperature dependence of population parameters: The effects of  
934 experimental design and inference algorithm. *Ecol Evol*. 2014;4: 4736–4750.  
935 doi:10.1002/ece3.1309
- 936
