1 **Title:** Climate explains geographic and temporal variation in mosquito-borne disease  
2 dynamics on two continents

3

4 Jamie M. Caldwell<sup>1</sup>, A. Desiree LaBeaud<sup>2</sup>, Eric F. Lambin<sup>3,4</sup>, Anna M. Stewart-Ibarra<sup>5,6</sup>,  
5 Bryson A. Ndenga<sup>7</sup>, Francis M. Mutuku<sup>8</sup>, Amy R. Krystosik<sup>2</sup>, Efraín Beltrán Ayala<sup>9</sup>,  
6 Assaf Anyamba<sup>10</sup>, Mercy J. Borbor-Cordova<sup>11</sup>, Richard Damoah<sup>12</sup>, Elysse N. Grossi-  
7 Soyster<sup>2</sup>, Froilán Heras Heras<sup>13</sup>, Harun N. Ngugi<sup>14,15</sup>, Sadie J. Ryan<sup>16-18</sup>, Melisa M.  
8 Shah<sup>19</sup>, Rachel Sippy<sup>13,20,21</sup>, Erin A. Mordecai<sup>1</sup>

9

10 <sup>1</sup> Department of Biology, Stanford University, 371 Serra Mall, Stanford, California, USA

11 <sup>2</sup> Department of Pediatrics, Division of Infectious Diseases, Stanford University, 300  
12 Pasteur Drive, Stanford, California, USA

13 <sup>3</sup> School of Earth, Energy & Environmental Sciences, and Woods Institute for the  
14 Environment, Stanford University, Stanford, California 94305, USA.

15 <sup>4</sup> Georges Lemaître Earth and Climate Research Centre, Earth and Life Institute,  
16 Université catholique de Louvain, 1348 Louvain-la-Neuve, Belgium.

17 <sup>5</sup> Department of Medicine and Department of Public Health and Preventative Medicine,  
18 SUNY Upstate Medical University, Syracuse, NY, USA

19 <sup>6</sup> InterAmerican Institute for Global Change Research (IAI), Montevideo, Uruguay

20 <sup>7</sup> Centre for Global Health Research, Kenya Medical Research Institute, Kisumu, Kenya

21 <sup>8</sup> Department of environment and health sciences, technical university of Mombasa,  
22 Mombasa, Kenya

23 <sup>9</sup> Technical University of Machala, Machala, Ecuador

- 24 <sup>10</sup> Universities Space Research Association and NASA Goddard Space Flight Center,  
25 Greenbelt, MD, USA.
- 26 <sup>11</sup> Facultad de Ingeniería Marítima y Ciencias del Mar, Escuela Superior Politécnica del  
27 Litoral, ESPOL, Guayaquil, Ecuador
- 28 <sup>12</sup> Morgan State University and NASA Goddard Space Flight Center, Greenbelt, MD,  
29 USA.
- 30 <sup>13</sup> Center for Research SUNY-Upstate-Teófilo Dávila Hospital, Machala, Ecuador
- 31 <sup>14</sup> Department of Biological Sciences, Chuka University, Chuka, Kenya
- 32 <sup>15</sup> Department of Zoology, School of Biological Sciences University of Nairobi, Nairobi,  
33 Kenya
- 34 <sup>16</sup> Emerging Pathogens Institute, University of Florida, Gainesville, Florida
- 35 <sup>17</sup> Quantitative Disease Ecology and Conservation (QDEC) Lab, Department of  
36 Geography, University of Florida, Gainesville, Florida;
- 37 <sup>18</sup> School of Life Sciences, University of KwaZulu, Natal, South Africa
- 38 <sup>19</sup> Department of Medicine, Division of Infectious Diseases, Stanford University, 300  
39 Pasteur Drive, Stanford, California, USA
- 40 <sup>20</sup> Institute for Global Health and Translational Science, SUNY-Upstate Medical  
41 University, Syracuse, NY, USA
- 42 <sup>21</sup> Department of Medical Geography, University of Florida, Gainesville, FL, USA
- 43
- 44
- 45
- 46

47 **Abstract:**

48 Climate drives population dynamics, but when the underlying mechanisms are  
49 unresolved, studies can lead to seemingly context-dependent effects of climate on natural  
50 populations. For climate-sensitive vector-borne diseases such as dengue, chikungunya,  
51 and Zika, climate appears to have opposing effects in different contexts. In this study, our  
52 objective was to test the extent to which a mathematical model, parameterized with  
53 climate-driven mosquito physiology measured in laboratory studies, predicts observed  
54 vector and disease dynamics in the field across ecologically and culturally distinct  
55 settings in Ecuador and Kenya. The model incorporates different rainfall functions and  
56 time lags. We show that the climate-driven model captures three key epidemic  
57 characteristics across settings: the number, timing, and duration of outbreaks. In addition,  
58 the model generates a range of disease dynamics consistent with observations of *Aedes*  
59 *aegypti* abundances and laboratory-confirmed arboviral incidence with varying levels of  
60 accuracy (28 – 85% for vector dynamics, 44 – 88% for human disease dynamics).  
61 Further, we find that the model predicted vector dynamics better in sites with a smaller  
62 proportion of young children in the population, lower mean temperature, and a larger  
63 proportion of homes with piped water and made of cement. A mechanistic model with  
64 limited calibration to local data that robustly captures the influence of climate on viruses  
65 transmitted by *Aedes aegypti* provides critical information to help guide future  
66 intervention efforts and improve disease projections associated with climate change.

67

68

69

70 **Introduction:**

71 Climate is a major driver of species interactions and population dynamics, but the  
72 mechanisms underlying the ecological effects of climate are often poorly understood and  
73 rarely tested in the field [1]. One of the primary ways that climate impacts populations is  
74 through its effects on species' vital rates [2]. However, the effects of climate on  
75 population dynamics may appear context dependent in the field because multiple climate  
76 variables can act synergistically, with each climate variable potentially affecting multiple  
77 vital rates, and their impacts may be nonlinear, changing direction and relative  
78 importance across a gradient of conditions [3,4]. Therefore, paradoxically, while climate  
79 is thought to be one of the most pervasive drivers of ecological processes, its directional  
80 and dynamical effects on systems are often poorly understood and difficult to predict.  
81 Vector-borne diseases provide an interesting case study to test whether climate sensitive  
82 traits measured in controlled, laboratory settings can reproduce the wide range of  
83 dynamics observed in the field. For example, transmission of mosquito-borne viral  
84 (arboviral) diseases such as dengue, chikungunya, and Zika occur along a spectrum from  
85 low levels of year-round endemic transmission [5] to large seasonal or interannual  
86 outbreaks [6]. We hypothesize that important features of these differing dynamics arise  
87 due to regional or seasonal differences in climate, where the magnitude and direction of  
88 the effects of climate on vector and disease dynamics differ [7–12].

89

90 Understanding the mechanisms that drive disease dynamics can help address two  
91 critically important research priorities for arboviruses like dengue, chikungunya, and  
92 Zika: assessing intervention strategies and projecting climate change impacts on disease

93 dynamics. While phenomenological models often replicate arboviral disease dynamics  
94 remarkably well [13], mechanistic models that do not rely on local data for calibration  
95 and capture mosquito population dynamics and interactions between mosquitoes and  
96 humans will provide more realistic projections for epidemic dynamics across a broad  
97 range of transmission settings. With no widely available vaccine, vector control (e.g.,  
98 larvicides, *Wolbachia*-infected mosquito releases) remains the primary method for  
99 preventing arboviral disease transmission, and, like other vector-borne diseases with  
100 complex transmission dynamics, model simulations can help guide effective intervention  
101 efforts [14,15]. Further, mechanistic models are better suited to predict how climate  
102 change will impact future disease burden and distribution, as projected climate conditions  
103 are outside the current arboviral climate niche space [16]. Despite the potential usefulness  
104 of mechanistic approaches, validation with vector and disease data are limited, raising an  
105 important question about which epidemic characteristics, if any, we should expect a  
106 model to capture when the model was parameterized with data that is on different scales  
107 (e.g., individuals versus populations) and independent from the transmission system we  
108 wish to predict. Thus, because we cannot study epidemic dynamics in every possible  
109 transmission setting, it becomes important to understand the extent to which models  
110 derived from fundamental and laboratory-measured traits explain disease dynamics  
111 across diverse settings.

112

113 We hypothesize that a climate-driven mechanistic model with limited calibration should  
114 capture many important characteristics of disease dynamics for dengue, chikungunya, and  
115 Zika because of the ecology of *Aedes aegypti*, the primary disease vector. *Ae. aegypti* are

116 anthropophilic, globally distributed mosquitoes that breed in artificial containers with  
117 standing water [17,18]. All mosquito and parasite traits that are important for  
118 transmission and linked to metabolism, such as reproduction, development, survival,  
119 biting rate, and extrinsic incubation period, are temperature dependent with an  
120 intermediate thermal optimum [19–21]. Humidity is positively associated with mosquito  
121 survival because the high surface area to volume ratio of mosquitoes exposes them to  
122 desiccation [22,23]. Standing water from rainfall provides essential larval and pupal  
123 habitat for mosquitoes, but the relationship is complex because heavy rainfall can flush  
124 away breeding habitats [24–26] and water storage practices during drought can increase  
125 water availability, mosquito abundance, and contact between mosquitoes and people [27–  
126 29]. A previous simulation study predicted that in settings with suitable climate for  
127 transmission throughout the year (e.g., mean temperature = 25°C; range = 20 – 30°C),  
128 temperature drives the timing and duration of outbreaks, but not the maximum number of  
129 infections or final epidemic size [30]. This finding suggests that a model that incorporates  
130 temperature-dependent vector traits should capture some important epidemic  
131 characteristics.

132

133 In this study, our goal was to test the extent to which climate-driven mosquito traits drive  
134 disease dynamics across two geographically distinct regions and to characterize  
135 additional climatological, ecological, and social factors that may mediate the effects of  
136 climate on disease dynamics. We built on previous mechanistic and semi-mechanistic  
137 models that incorporate the *Aedes* mosquito life cycle and human disease dynamics [30–  
138 35] by combining a suite of temperature, humidity, and rainfall dependent trait functions

139 into one epidemiological model. We validated the model with *Ae. aegypti* abundances  
140 and laboratory-confirmed dengue, chikungunya, and Zika cases from two equatorial  
141 countries with distinct socioeconomic, geographic, cultural, and disease transmission  
142 settings: Ecuador and Kenya (Fig. 1, Table 1). The study sites within each country were  
143 distributed across a gradient of temperature, humidity, and rainfall. Previous studies have  
144 found that *Ae. aegypti* and dengue were positively associated with warm and wet  
145 conditions in Ecuador and Kenya [6,36–38], although other *Ae. aegypti*-vectored  
146 arboviruses in Kenya such as chikungunya have been associated with warm and dry  
147 conditions [39]. Both countries have all four dengue serotypes circulating and have  
148 recently experienced outbreaks of chikungunya; yet, arboviral transmission dynamics  
149 differ in each country. In Ecuador, dengue is a re-emerging disease with large seasonal  
150 epidemics that frequently result in severe dengue [6]; by contrast, in Kenya, dengue is  
151 transmitted at low levels year-round [5] and intermittent self-limiting outbreaks often go  
152 undetected [40]. Further, compared with South America, severe dengue is rare in sub-  
153 Saharan Africa, perhaps because African strains of *Ae. aegypti* have lower susceptibility  
154 to all four dengue serotypes [41], and/or because people of African ancestry are less  
155 susceptible to severe dengue [42].

156

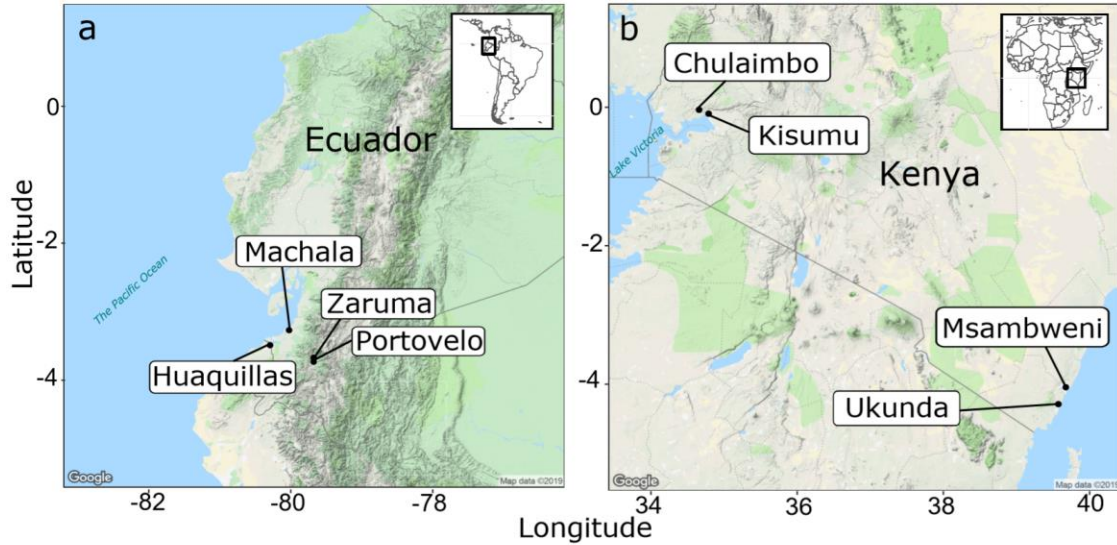

157

158 **Figure 1: Study sites within two equatorial countries:** (a) Ecuador in South America  
159 and (b) Kenya in East Africa.

160

161 **Table 1: Study sites differ geographically, climatologically, and socioeconomically.**

162 <sup>1</sup>Mean annual normalized difference vegetation index (NDVI) is a proxy for

163 photosynthesis and measured as a difference in spectral reflectance in the visible and

164 near-infrared regions from NASA/NOAA MODIS (MOD13A1) [43]. <sup>2</sup>Dominant land

165 cover type is measured and classified from spectral and temporal features from

166 NASA/NOAA MODIS (MCD12Q1) [44]. Land cover types include (9) Tree cover 10 -

167 30%, (10) Dominated by herbaceous annuals, (13) >30% impervious surface area, and

168 (14) 40 - 60% mosaics of small-scale cultivation. Bed net use represents availability of

169 and/or willingness to adopt intervention strategies for preventing infection rather than a

170 direct adaptive response to preventing infection by day-biting *Ae. aegypti* mosquitoes.

171



|                                                       | Huauquilas,<br>Ecuador                                                                                               | Machala,<br>Ecuador | Portovelo,<br>Ecuador | Zaruma,<br>Ecuador | Chulaimbo,<br>Kenya                                                                                            | Kisumu,<br>Kenya | Msmabweni,<br>Kenya | Ukunda,<br>Kenya |
|-------------------------------------------------------|----------------------------------------------------------------------------------------------------------------------|---------------------|-----------------------|--------------------|----------------------------------------------------------------------------------------------------------------|------------------|---------------------|------------------|
| <b>Site characteristics</b>                           |                                                                                                                      |                     |                       |                    |                                                                                                                |                  |                     |                  |
| Elevation (m)                                         | 15                                                                                                                   | 6                   | 645                   | 1,155              | 1,328                                                                                                          | 1,100            | 4                   | 8                |
| Location                                              | Coastal                                                                                                              | Coastal             | Inland                | Inland             | Inland                                                                                                         | Inland           | Coastal             | Coastal          |
| Mean annual NDVI <sup>1</sup>                         | 0.22                                                                                                                 | 0.12                | 0.61                  | 0.57               | 0.63                                                                                                           | 0.35             | 0.33                | 0.52             |
| Dominant land cover type <sup>2</sup>                 | 13                                                                                                                   | 13                  | 9                     | 10                 | 14                                                                                                             | 13               | 13                  | 10               |
| <b>Climate</b>                                        |                                                                                                                      |                     |                       |                    |                                                                                                                |                  |                     |                  |
| Mean temperature (°C)                                 | 26                                                                                                                   | 26                  | 25                    | 22                 | 24                                                                                                             | 26               | 28                  | 28               |
| Mean relative humidity (%)                            | 81                                                                                                                   | 84                  | 81                    | 86                 | 69                                                                                                             | 50               | 76                  | 78               |
| Mean annual rainfall (mm)                             | 317                                                                                                                  | 669                 | 500                   | 1115               | 1125                                                                                                           | 810              | 1048                | 922              |
| <b>Demographics</b>                                   |                                                                                                                      |                     |                       |                    |                                                                                                                |                  |                     |                  |
| Human population size                                 | 57,366                                                                                                               | 279,887             | 13,673                | 25,615             | 7,304                                                                                                          | 491,893          | 15,371              | 80,193           |
| Population <5 years (%)                               | 10                                                                                                                   | 9                   | 9                     | 8                  | 12                                                                                                             | 12               | 13                  | 14               |
| Population of African ancestry (%)                    | 5.1                                                                                                                  | 6.0                 | 3.3                   | 2.9                | 100.0                                                                                                          | 100.0            | 100.0               | 100.0            |
| <b>Housing quality (% houses)</b>                     |                                                                                                                      |                     |                       |                    |                                                                                                                |                  |                     |                  |
| Piped water inside home                               | 90                                                                                                                   | 91                  | 100                   | 96                 | 2                                                                                                              | 4                | 3                   | 11               |
| No screens on windows                                 | 7                                                                                                                    | 60                  | 91                    | 99                 | 74                                                                                                             | 78               | 43                  | 21               |
| House materials (cement/mud/wood)                     | 87/5/0                                                                                                               | 87/8/5              | 95/0/5                | 93/1/1             | 29/70/0                                                                                                        | 77/17/0          | 38/62/0             | 51/47/0          |
| <b>Exposure, vulnerability, and adaptive capacity</b> |                                                                                                                      |                     |                       |                    |                                                                                                                |                  |                     |                  |
| Arboviruses present                                   | dengue, chikungunya, Zika                                                                                            |                     |                       |                    | >200 documented including dengue, chikungunya, Yellow fever, Rift Valley fever, West Nile fever, O'nyong-nyong |                  |                     |                  |
| Insecticide use (% houses)                            | 19                                                                                                                   | 28                  | 46                    | 37                 | 0                                                                                                              | 0                | 11                  | 55               |
| Bednet use (% houses)                                 | 77                                                                                                                   | 55                  | 15                    | 21                 | 93                                                                                                             | 92               | 0                   | 96               |
| Other vector control strategies used                  | Ultra-low volume fumigation with malathion (organophosphate) and community mobilization to eliminate larval habitats |                     |                       |                    | Mosquito coils                                                                                                 |                  |                     |                  |
| Annual gross domestic product by country (2018)       | \$177 billion USD                                                                                                    |                     |                       |                    | \$85.98 billion USD                                                                                            |                  |                     |                  |

172

173 **Results:**

174 ***Capturing key epidemic characteristics***

175 The dynamic susceptible, exposed, infectious – susceptible, exposed, infectious, removed

176 (SEI-SEIR) compartmental model parameterized with temperature-, humidity-, and

177 rainfall-dependent mosquito life history traits (Fig. 2) reproduced three key

178 characteristics of epidemics: number of outbreaks, timing of outbreak peak, and duration

179 of outbreaks. We defined an outbreak as a continuous time period with peak cases  
 180 exceeding the mean number of cases (predicted or observed) plus one standard deviation  
 181 within a site. Across all sites, the number of outbreaks predicted by the model closely  
 182 matched the number of outbreaks observed ( $R^2 = 0.79$ ,  $p < 0.01$ ; Fig. 3a). Supporting our  
 183 *a priori* expectations based on a previous simulation study [30], we found that the  
 184 climate-driven model predicted peak timing of outbreaks ( $R^2 = 0.71$ ,  $p < 0.01$ ; Fig. 3b)  
 185 and outbreak duration ( $R^2 = 0.51$ ,  $p < 0.01$ ; Fig. 3c) well but did not predict the final  
 186 outbreak size (Fig. 3d) or maximum number of infections (Fig. 3e) across sites. Overall,  
 187 the model predicted four outbreaks that were not observed and did not predict five  
 188 outbreaks that occurred. The model may miss an outbreak (i.e., false negatives) when, for  
 189 example, suitable climate occurs but the pathogen is not introduced or the susceptible  
 190 population is depleted from previous outbreaks.

191

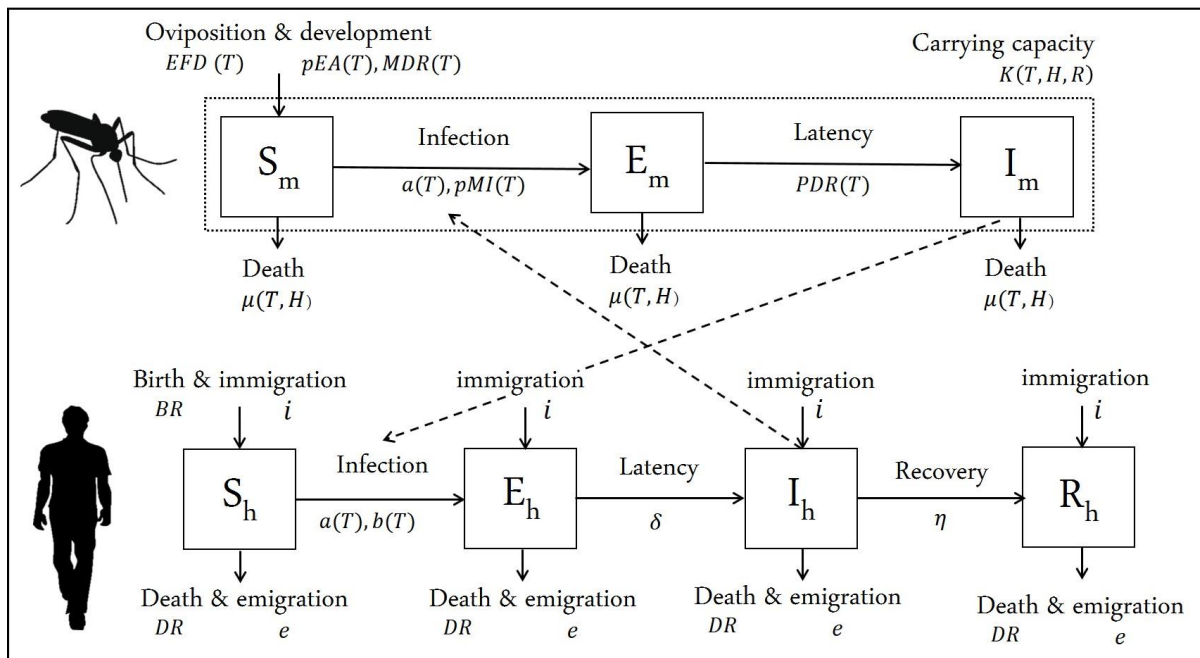

192

193 **Figure 2: SEI-SEIR epidemiological model framework.** The mosquito population is  
194 split among susceptible ( $S_m$ ), exposed ( $E_m$ ), and infectious ( $I_m$ ) compartments (squares)  
195 and the human population is split among susceptible ( $S_h$ ), exposed ( $E_h$ ), infectious ( $I_h$ ),  
196 and recovered ( $R_h$ ) compartments. Solid arrows indicate the direction individuals can  
197 move between classes and dashed arrows indicate the direction of transmission.  
198 Transitions among compartments are labeled by the appropriate processes and  
199 corresponding rate parameters (see Methods for parameter definitions and more detail).  
200 Rate parameters with a T, H, and R are temperature-, humidity-, and rainfall-dependent,  
201 respectively. The total adult mosquito population ( $S_m$ ,  $E_m$ , and  $I_m$  compartments; dotted  
202 rectangle) is maintained at an abundance less than or equal to the mosquito carrying  
203 capacity.  
204  
205

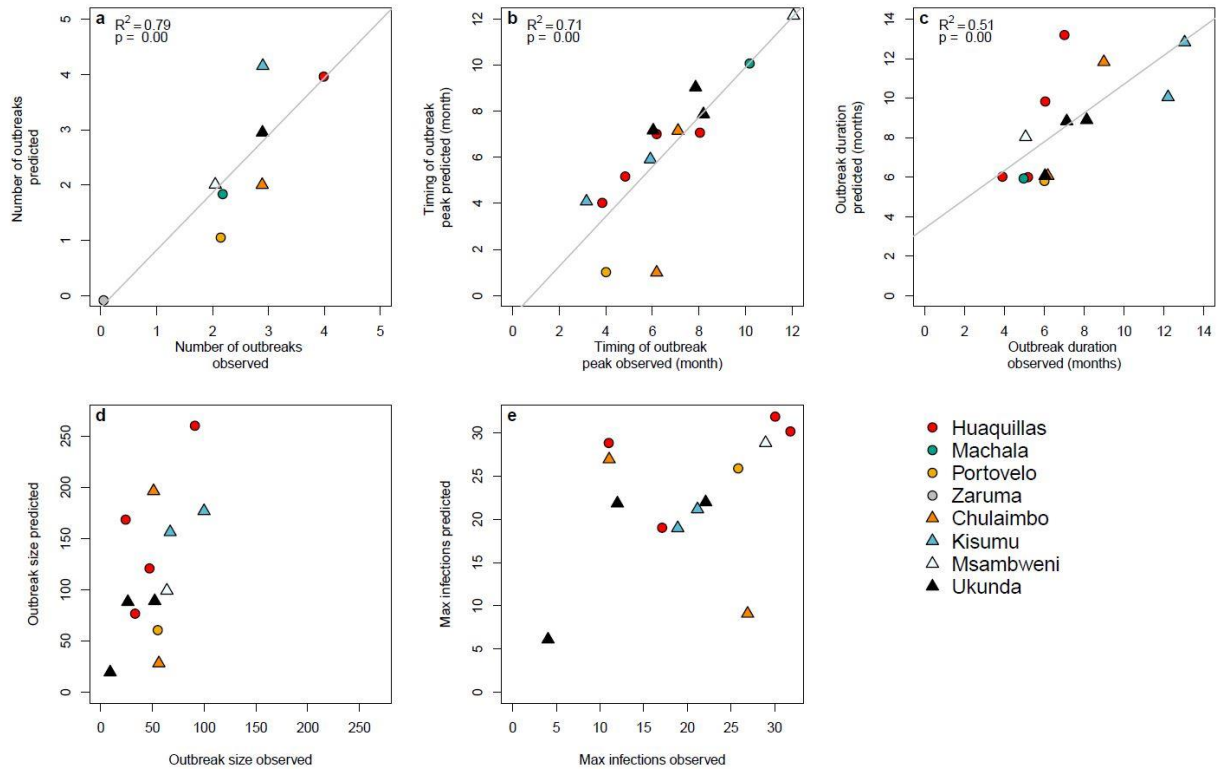

206

207 **Figure 3: Model predictions for the number, timing, and duration of arboviral**  
208 **outbreaks closely matched field observations.** Scatterplots show model predictions  
209 versus observations for different epidemic characteristics. (a) Number of outbreaks  
210 indicates the total number of predicted and observed outbreaks in a site over the study  
211 period. (b) Timing of outbreak peak, (c) outbreak duration, (d) outbreak size, and (e)  
212 maximum infections (e.g., max  $I_h$  during an outbreak) correspond to individual outbreaks  
213 where model predictions and observations overlapped in time, therefore, some plots show  
214 multiple data points per site. Outbreaks are colored by site with different symbols for  
215 Ecuador (circles) and Kenya (triangles). We show regression lines and associated  
216 statistics for statistically significant relationships. For visualization purposes, we jittered  
217 the data points to show overlapping data and we excluded data from Machala in plots (d)

218 outbreak size and (e) maximum infections because the magnitude differed substantially  
219 from all other sites.

220

221 **Capturing spatio-temporal disease dynamics across sites**

222 The SEI-SEIR model generated mosquito and disease dynamics that better reflected  
223 observed dynamics in some sites than others (Fig. 4, Table 2). Model-predicted mosquito  
224 abundances were significantly correlated with field-collected observations of mosquito  
225 abundances in all eight study sites, explaining 28 – 85% of site-level variation through  
226 time based on pairwise correlations with an adjusted p-value for time series data  
227 (following [45]). Based on surveys conducted across all vector life stages in Kenya (only  
228 adult mosquitoes were collected in the Ecuador surveys), the SEI-SEIR model explained  
229 variation in the abundance of adult mosquitoes (28 – 63%) better than pupae (25 – 32%),  
230 late instars (30 – 33%), early instars (20 – 36%), and eggs (33 – 55%), likely because the  
231 model did not explicitly incorporate other mosquito life history stages. Model-predicted  
232 disease cases were significantly correlated with laboratory-confirmed arboviral incidence  
233 in seven of the eight study sites, explaining 44 – 88% of site-level variation through time  
234 (within sites with statistically significant pairwise correlations). We confirmed that the  
235 predicted dynamics were stable with sensitivity analyses to initial conditions (see  
236 Methods), as emerging diseases can display chaotic dynamics due to a high sensitivity to  
237 initial conditions. Overall, the model reproduced disease dynamics slightly better for sites  
238 in Ecuador compared with Kenya.

239

240

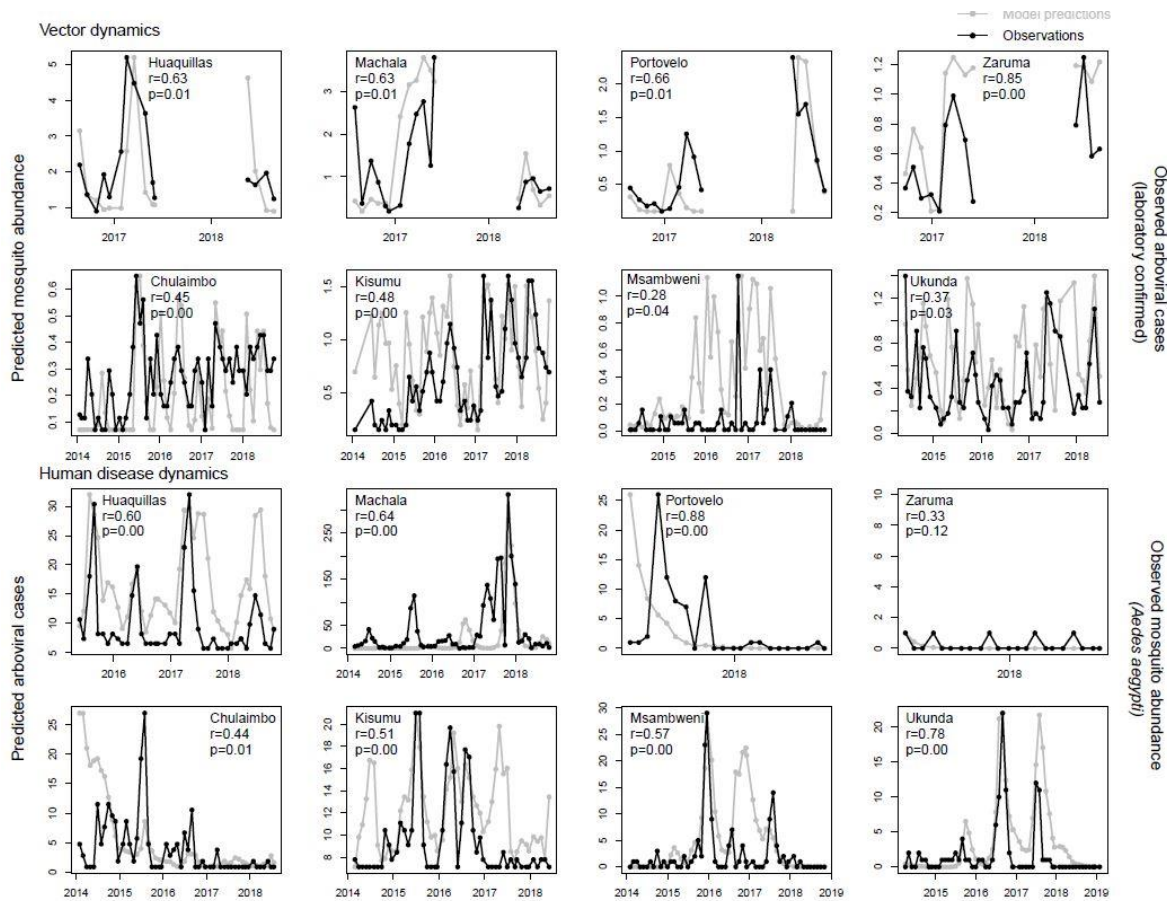

241

242 **Figure 4: Model predicts vector and human disease dynamics better in some settings**

243 **than others.** Each plot shows the time series of SEI-SEIR model predictions (grey dots

244 connected by grey lines) and field observations (black dots connected by black lines) for

245 vector (top two rows) and human disease (bottom two rows) dynamics for each study site

246 with the pairwise correlation (r) and adjusted p-value (p). We calculated observed

247 mosquito abundances as the mean number of adult *Ae. aegypti* per house, month, year,

248 and site. We calculated observed arboviral cases as the total number of laboratory-

249 confirmed dengue (any serotype), chikungunya, and Zika cases per month, year, and site;

250 six of the eight study sites only included dengue cases (see Methods). The first and third

251 rows show sites in Ecuador and the second and fourth rows show sites in Kenya. We

252 show uncertainty in model predictions in Figs. S1-2.

253 **Table 2: Model predictions reflect a range of observed transmission dynamics when**  
 254 **incorporating different rainfall functions and time lags across sites.** For each study  
 255 site, we calculated pairwise correlations between time series of field observations (*Ae.*  
 256 *aegypti* abundances or arboviral cases) and time series of model predictions for the SEI-  
 257 SEIR model with one of three rain functions for mosquito carrying capacity (Brière,  
 258 Inverse, or Quadratic) and six time lags (0-5 months). This table shows specifications for  
 259 the model (e.g., rain function and time lag) with the highest pairwise correlation value,  $r$ ,  
 260 for each study site and observation type (vectors or human disease cases), as well as the  
 261 statistical significance of the correlation value (adjusted p-value) based on the Modified  
 262 Chelton method [45] to account for temporal autocorrelation.

| Site                | Vector dynamics   |      |                  |              | Human disease dynamics |      |                  |              |
|---------------------|-------------------|------|------------------|--------------|------------------------|------|------------------|--------------|
|                     | Rainfall function | $r$  | Adjusted p-value | Lag (months) | Rainfall function      | $r$  | Adjusted p-value | Lag (months) |
| Huaquillas, Ecuador | Quadratic         | 0.63 | 0.01             | 1            | Inverse                | 0.60 | 0.00             | 2            |
| Machala, Ecuador    | Quadratic         | 0.63 | 0.01             | 0            | Brière                 | 0.64 | 0.00             | 4            |
| Portovelo, Ecuador  | Brière            | 0.66 | 0.01             | 1            | Brière                 | 0.88 | 0.00             | 3            |
| Zaruma, Ecuador     | Inverse           | 0.85 | 0.00             | 1            | Inverse                | 0.33 | 0.12             | 0            |
| Chulaimbo, Kenya    | Inverse           | 0.45 | 0.00             | 1            | Quadratic              | 0.36 | 0.02             | 4            |
| Kisumu, Kenya       | Brière            | 0.48 | 0.00             | 0            | Quadratic              | 0.51 | 0.00             | 4            |
| Msambweni, Kenya    | Inverse           | 0.28 | 0.04             | 0            | Inverse                | 0.57 | 0.00             | 3            |
| Ukunda, Kenya       | Inverse           | 0.37 | 0.03             | 1            | Inverse                | 0.78 | 0.00             | 5            |

263

264 We found evidence that rainfall affects transmission through multiple mechanisms and at  
 265 different time lags (Table 2). Since the effect of rainfall on mosquito abundances is not  
 266 well understood, we simulated disease dynamics for each site three times, using one of

267 three hypothesized rainfall relationships (Brière, inverse, and quadratic; Fig. S3). We  
268 determined the best rainfall function and time lag for each site based on the highest  
269 pairwise correlation value between model predictions and observations. The model with  
270 the exponentially decreasing inverse rain function (Fig. S3c), which indicates that  
271 mosquito abundances peak when there is no or low rainfall (likely as a result of water  
272 storage practices and/or unreliable water sources) described observed mosquito and  
273 disease dynamics most often, especially in the Kenya sites (Table 2), where household  
274 access to piped water is very low (Table 1). The left-skewed unimodal Brière rainfall  
275 function (Fig. S3a), which indicates that mosquito abundances increase with increasing  
276 rainfall until some threshold where flushing occurs, described disease dynamics in some  
277 settings, particularly in the Ecuador sites. The symmetric unimodal quadratic rainfall  
278 function (Fig. S3b), which indicates that mosquito abundances peak with intermediate  
279 amounts of rainfall and are reduced with low and high rainfall values, also described  
280 disease dynamics in some settings. Interestingly, we did not find a single rainfall function  
281 that consistently described dynamics for mosquitoes or arboviral cases across study sites,  
282 or for both mosquitoes and arboviral cases within individual study sites (Table 2). In  
283 contrast, we did find some consistency with time lags. The model best predicted  
284 mosquito abundances in the same month or one month in the future. In more than half of  
285 the sites, the model best predicted human disease cases three to four months in the future,  
286 and in almost all sites at least two months in the future (the exception is Zaruma, where  
287 very few arbovirus cases were reported during the study period and were likely due to  
288 importation rather than local transmission). Given that multiple rainfall functions and  
289 time lags are supported by field data (even within the same study site), we propose a



290 conceptual model that incorporates multiple pathways for rainfall to affect disease  
291 dynamics along a continuum of rainfall (Fig. 5), in contrast to distinct functional  
292 relationships for a given setting, which motivated the approach used in this study.  
293

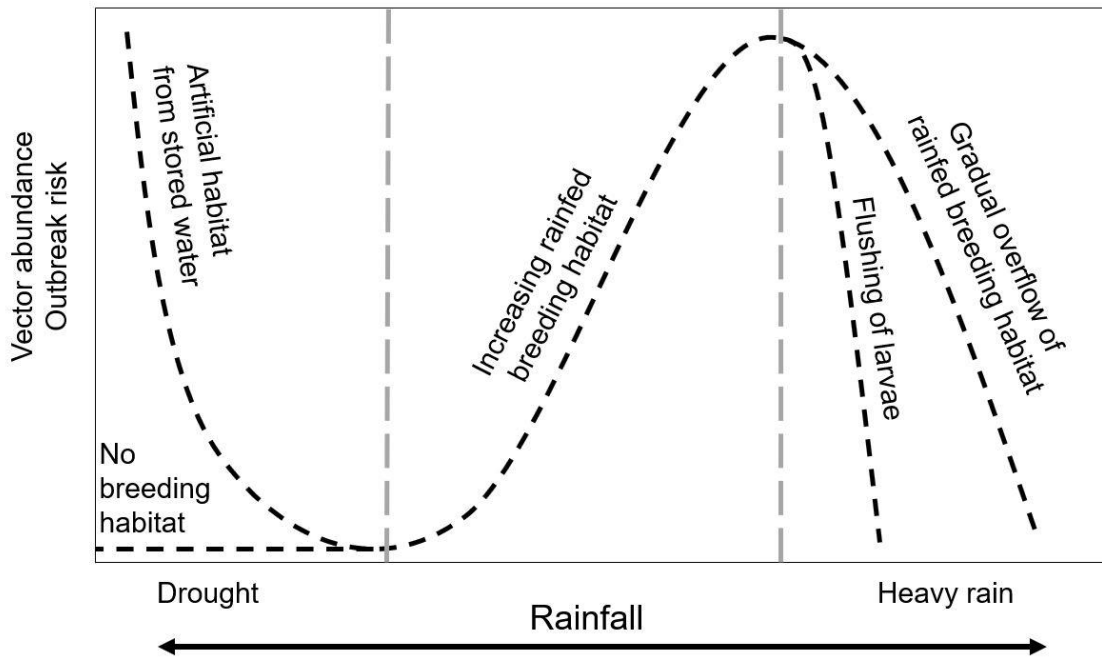

294

295 **Figure 5: Conceptual model for nonlinear functional relationships between rainfall**  
296 **and vector abundance and arboviral outbreak risk.** Dashed lines show multiple  
297 potential pathways for rainfall to affect transmission dynamics and include the functional  
298 relationships supported in this study. Labels indicate the hypothesized mechanisms along  
299 a gradient of rainfall. Adapted from [46].

300

### 301 **Factors that mediate disease dynamics predictability**

302 The ability of the model to generate similar dynamics to those found in the field varied  
303 with demography, housing quality, and climate. Although the sample size is small (N = 8

304 sites), we found that the SEI-SEIR model generally predicted vector dynamics better in  
305 sites with a smaller proportion of young children in the population ( $R^2 = 0.89$ ,  $p < 0.01$ ;  
306 Fig. 6a), lower mean temperature ( $R^2 = 0.63$ ,  $p < 0.05$ ; Fig. 6c), and a larger proportion of  
307 homes with piped water ( $R^2 = 0.76$ ,  $p < 0.01$ ; Fig. 6b) and made of cement ( $R^2 = 0.69$ ,  $p$   
308  $< 0.05$ ; Fig. 6d; list of all factors we assessed are provided in Table 1). Based on the  
309 range of mean temperatures at our study sites (22 – 28°C), our findings indicate that  
310 vector dynamics become less predictable as temperatures near the optimal temperature  
311 for transmission (derived in previous studies as 29°C) following the shape and slope in  
312 the  $R_0$  curve (Fig. 7). This complements phenomenological models that have found  
313 minimal effects of temperature near the empirically derived thermal optima (Fig. 7).  
314 None of the socio-economic factors that we examined in this study (Table 1) explained  
315 variability in the pairwise correlations for human disease cases among sites.  
316

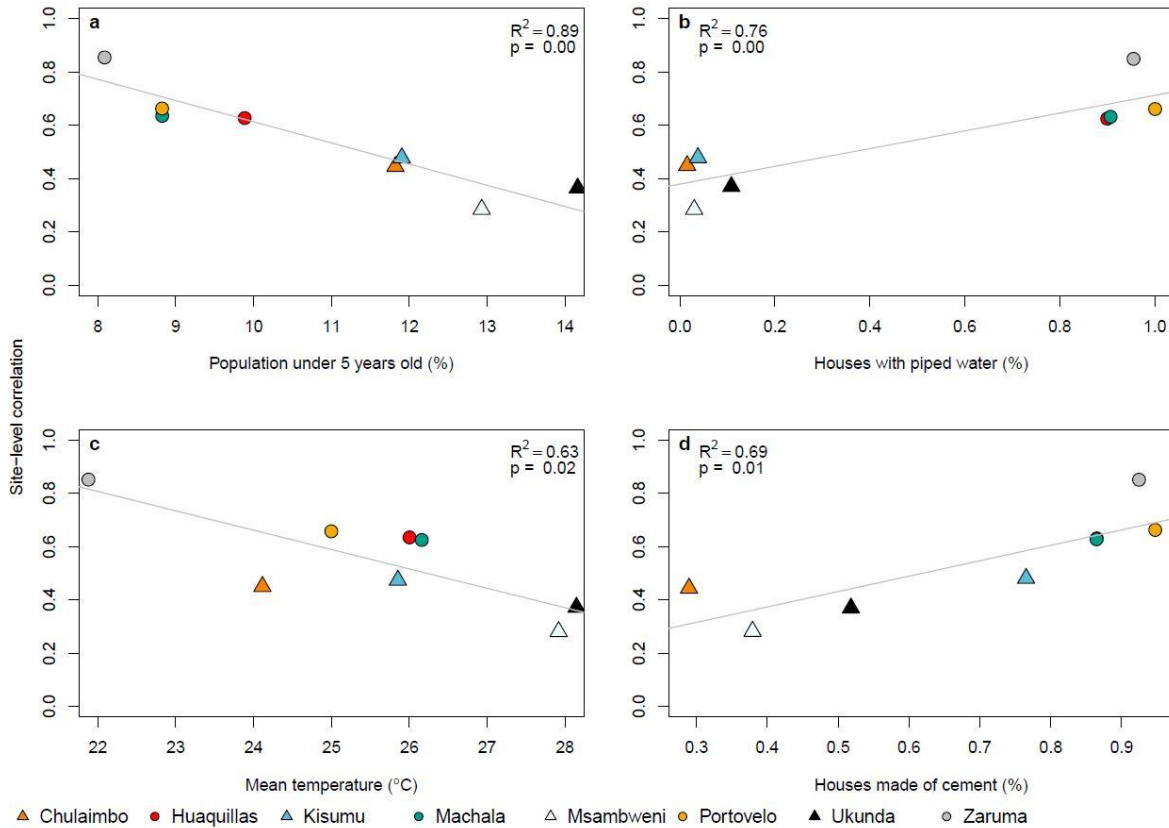

317

318 **Figure 6: Demography, housing construction, and climate affect model predictive**

319 **capacity for vectors.** Factors that influence the predictability of vector dynamics include

320 (a) proportion of the population under five years of age, (b) proportion of houses with

321 piped water, (c) mean temperature, and (d) proportion of houses made with cement (walls

322 and/or floors). Points indicate the pairwise correlation value for a single site (colors) with

323 different symbols for Ecuador (circles) and Kenya (triangles). Each plot also shows the

324 linear regression lines and associated statistics.

325

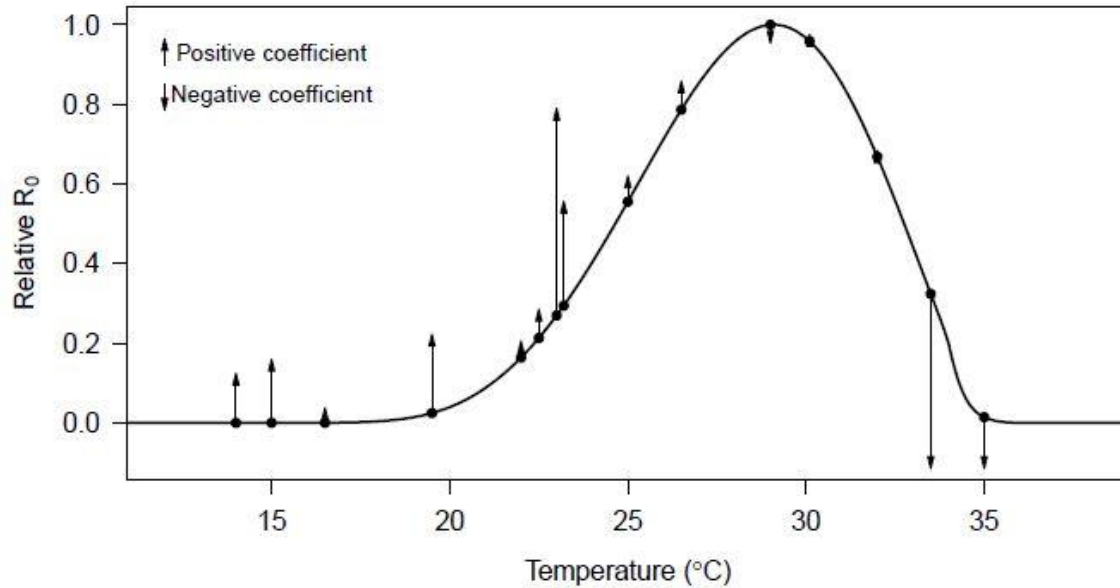

326

327 **Figure 7: Independently predicted relative  $R_0$  from a model derived from**  
328 **laboratory studies explains differences in the magnitude and direction of the effects**  
329 **of temperature on dengue transmission in the field across varied settings from**  
330 **previous studies.** The black line shows the relative basic reproductive number ( $R_0$ ,  
331 normalized to a 0-1 scale) plotted against temperature based on all temperature-  
332 dependent traits from [19] used in the SEI-SEIR model presented here. Points indicate  
333 mean temperature values from previous field-based statistical analyses that related  
334 dengue cases with minimum, maximum, or mean ambient temperature; arrows  
335 correspond to the direction (up = positive, down = negative) and relative effect size of the  
336 temperature – dengue relationship based on coefficient values from the following studies:  
337 [47,48,57,58,49–56]. See Methods and Table S1 for more detail. As expected, the largest  
338 observed positive effects of temperature occurred in the rapidly increasing portion of the  
339  $R_0$  curve (~22-25°C; consistent with findings in this study) and the largest observed  
340 negative effects occurred well above the predicted optimum, near the upper thermal limit  
341 (~33-35°C).

342

343 **Discussion:**

344 Directly observing the influence of climate on species interactions and population  
345 dynamics is often challenging because of interacting and nonlinear relationships. Here,  
346 we directly and quantitatively connect laboratory-based climate relationships to observed  
347 mosquito and disease dynamics in the field, supporting the mechanistic role of climate in  
348 these disease systems. The trait-based modeling approach captured several key epidemic  
349 characteristics and generated a range of disease dynamics along a spectrum of settings  
350 with low levels of transmission to seasonal outbreaks, helping to reconcile seemingly  
351 context dependent effects (i.e., opposite conclusions about the magnitude and direction of  
352 effects; Fig. 7) of climate on arboviral transmission dynamics from the literature [7–  
353 12,47].

354

355 The results of this study shed some light on the influence of climate in driving endemic  
356 versus epidemic dengue transmission. Although Ecuador typically experiences seasonal  
357 epidemics [6] and Kenya typically experiences low levels of year-round transmission [5],  
358 the sites within this study suggest that epidemic transmission is more common in settings  
359 with clear seasonality (e.g., coastal sites) whereas endemic transmission is more common  
360 in settings with more climate variability (e.g., inland sites), regardless of country. Coastal  
361 sites experienced more regular seasonal climate cycles, likely because oceans buffer  
362 climate variability, and this seasonality corresponded with seasonal epidemics. In  
363 contrast, the inland sites experienced more day-to-day climate variability, which resulted  
364 in more fluctuations in disease cases. As a result, the occurrence and persistence of

365 suitable temperature, rainfall, and humidity conditions enabling outbreaks were less  
366 regular in sites with more climate variability. The ability of the model to detect key  
367 epidemic characteristics across endemic and epidemic settings indicates that climate  
368 plays a major role in driving when outbreaks occur and how long they last.

369

370 Using field data on mosquitoes and disease cases from diverse settings and a model  
371 parameterized with data from other studies, we identified several key epidemic  
372 characteristics that we should (and should not) expect to capture in new settings. While  
373 we would never expect a perfect correlation between model predictions and observations,  
374 even if the model perfectly captured climate-host-vector dynamics because of the many  
375 additional factors that affect transmission in nature, our results indicate that a model with  
376 limited calibration can determine the number of outbreaks across settings remarkably  
377 well (Fig. 3a). This finding could be particularly useful for prioritizing surveillance or  
378 intervention activities across a range of a potential sites that would otherwise appear  
379 equal in their propensity for outbreaks (e.g., similar climate conditions). We also show  
380 that the model captures the peak timing of outbreaks (Fig. 3b) and outbreak duration (Fig.  
381 3c) but not the final outbreak size (Fig. 3d) or maximum number of infections (Fig. 3e),  
382 supporting the hypothesis that the magnitude of disease cases during an outbreak in  
383 settings with year-round climate suitability for disease transmission are invariant to  
384 temperature, as proposed by [30], likely because the magnitude of disease cases is  
385 probably more strongly driven by the availability of susceptible hosts.

386

387 Given that the model generally did not predict the magnitude of outbreaks, we asked how  
388 well the model reproduced vector and human disease dynamics (i.e., variation over time)  
389 across sites and whether this relationship varied systematically with different socio-  
390 economic factors. Across sites, the range of temporal correlations between model  
391 predictions and observations ( $N = 8$ ; Fig. 4, Table 2) provides an informative metric for  
392 the proportion of true disease dynamics that we might expect to capture in new settings,  
393 ranging from 28 – 88%. The correlations varied with demography, housing construction,  
394 and climate (Fig. 6). The model may have better explained vector dynamics in locations  
395 with a lower proportion of children under five years old for a variety of reasons,  
396 including because bottom-heavy demographic pyramids are often associated with lower  
397 socioeconomic status and higher mobility throughout the day. In addition to the  
398 demographic makeup of sites, housing construction within sites also seems to modify  
399 transmission dynamics: vector dynamics were less predictable in sites with more houses  
400 with piped water and made of cement (Fig. 6b,d). These results suggest that piped water  
401 may prevent additional contact between humans and mosquitoes associated with stored  
402 water around the home. In addition, housing materials like cement that lower indoor  
403 temperature could artificially decrease climate suitability for mosquitoes, thereby  
404 decreasing the probability that mosquitoes will enter and bite people inside their homes.  
405 Despite incorporating all known temperature-dependent mosquito traits into the SEI-  
406 SEIR model, we still found vector dynamics became less predictable near the empirically  
407 derived thermal optima for arboviral transmission (Figs. 6c, 7). This finding may be  
408 associated with physiological or behavioral responses of mosquitoes to temperatures near

409 their thermal safety margin [59,60] and/or humans modifying their environment (as  
410 described above) in locations optimal for transmission.

411

412 Across the study sites, we found support for three hypothesized relationships between  
413 rainfall and mosquito carrying capacity as well as several time lags between model  
414 predictions and disease observations. Support for multiple rainfall functions could  
415 indicate that the effects of rainfall on immature habitat is highly heterogenous, which has  
416 been found in previous research in Ecuador [27] and Kenya [61]. Alternatively, the  
417 combination of multiple rainfall relationships and time lags could arise from nonlinear  
418 and delayed effects of extreme climate such as droughts and floods. More specifically,  
419 we hypothesize that there may be multiple mechanistic relationships for the effects of  
420 rainfall on mosquito abundance and arboviral disease dynamics (Fig. 5), and they may act  
421 on different time scales. For example, previous research indicated that dengue outbreaks  
422 were more likely to occur four to five months after a drought and one month after  
423 excessive rainfall and a statistical model that incorporated these dual exposure-lag-  
424 response functions was highly effective at predicting dengue outbreaks in Barbados [62].  
425 Further, if multiple rainfall relationships act in concert across varying time lags, this  
426 would help to explain why many different time lags have been observed between rainfall  
427 and arboviral dynamics in previous studies [6,27,51,63–65].

428

429 Future research can build on this study to improve our understanding of arboviral  
430 dynamics across settings. There were several factors that we did not include in this study,  
431 such as existing vector control programs, infrastructure, and preexisting immunity in the



432 population. For instance, in Ecuador, factors such as distance to abandoned properties,  
433 interruptions in access to piped water, shaded patios, and use of vector control are  
434 documented to influence arbovirus transmission [66], whereas in the study sites in Kenya,  
435 factors associated with arboviral transmission are less well studied and there are currently  
436 no widely used vector control or local arboviral surveillance programs employed. Future  
437 studies could further improve the model by incorporating human immune dynamics  
438 associated with interactions among different dengue serotypes [67] or cross-reactivity  
439 among viral antibodies [68], differential susceptibility across human age classes [69], and  
440 heterogeneity in contact rates between mosquitoes and people based on human behavior  
441 and movement [70,71]. Further, as experimental data becomes available for trait  
442 estimates specific to chikungunya and Zika, this model could be partitioned to model  
443 each arboviral disease individually. This is likely to be an important addition as the  
444 different arboviruses tend to peak in different years, possibility due to differences in viral  
445 development rates and extrinsic incubation periods among arboviruses. Therefore,  
446 validating the model with all three arboviruses combined may oversimplify the complex  
447 interannual dynamics that arise due to competition among arboviruses in mosquitoes and  
448 humans. There were not enough data for chikungunya and Zika cases in this study to  
449 formally test such patterns. This study provides strong evidence that a trait-based model,  
450 parameterized independently from field data, can reproduce key epidemic characteristics  
451 and a range of spatiotemporal arboviral disease dynamics. Such mechanistic, climate-  
452 driven models will become increasingly important to support public health efforts in the  
453 face of novel climate regimes emerging due to climate change.  
454

455 **Materials and Methods:**

456 Climate data

457 We collected *in situ* measurements of daily mean temperature, relative humidity, and  
458 rainfall at each study site and interpolated missing data where necessary. We used  
459 temperature and humidity measurements from HOBO loggers and rainfall measurements  
460 from rain gauges for sites in Kenya. We used temperature, humidity, and rainfall  
461 measurements from automatic weather stations operated by the National Institute of  
462 Meteorology and Hydrology in Ecuador. For Kenya, we interpolated missing temperature  
463 data from NOAA Global Surface Summary of the Day (Table S2, Fig. S4) and  
464 interpolated missing rainfall data from NOAA Climate Prediction Center Africa Rainfall  
465 Climatology dataset (Table S2, Fig. S5). For Ecuador, we interpolated missing  
466 temperature (Table S2, Fig. S4) and rainfall (Table S2, Fig. S5) data using the nearest  
467 study site where possible and otherwise based on long term mean values for the  
468 corresponding Julian day. To interpolate missing data, we linearly regressed all  
469 measurements taken on the same day in two datasets and then used the linear model to  
470 interpolate temperature for the site with missing data based on the climate measurement  
471 from the secondary source for the date when the data was missing (Figs. S4-5). For  
472 rainfall, we first calculated a moving window of 14-day accumulated rainfall (which is  
473 short enough to capture variability and seasonality in rainfall patterns and follows [72])  
474 for each day before interpolation because modeled daily rainfall values are less reliable  
475 than accumulated rainfall over a two week period. We interpolated 14-day cumulative  
476 rainfall for any day with a missing rainfall value in the prior 14 days. For both Kenya and  
477 Ecuador, we interpolated missing relative humidity data based on long term mean values

478 for the corresponding Julian day (Table S2). We then calculated the saturation vapor  
479 pressure deficit (SVPD) from temperature and humidity to use in the humidity function  
480 because previous research suggests SVPD is a more informative measure of the effect of  
481 humidity on mosquito survival compared with relative humidity [73]. To calculate  
482 SVPD, we first calculated the saturation vapor pressure as:

$$SVP = 610.7 * 10^{7.5*T/(273.3+T)} \quad (1)$$

483 where ( $T$ ) is temperature in degrees Celsius. We then calculated SVPD (in kilopascals) as

$$SVPD = 1 - \frac{RH}{100} * SVP \quad (2)$$

484 where RH is relative humidity. The final dataset had no missing values for temperature  
485 (Fig. S6), rainfall (Fig. S7), and humidity (Fig. S8).

486

487 Vector surveys

488 We collected, counted, sexed, and classified mosquitoes by species, and aggregated the  
489 data to mean number of *Aedes aegypti* per house, month, year, and site to account for  
490 differences in survey effort across months and sites. We collected adult mosquitoes using  
491 Prokopack aspirators [74]. In Ecuador, we collected mosquitoes from approximately 27  
492 houses per site (range = 3-57 houses across four sites) every one-to-two weeks during  
493 three, four-month sampling periods between July 2016 and August 2018 ( $\approx 37$  sampling  
494 weeks per site) to capture different parts of the transmission season. We aggregated the  
495 Ecuador vector data to monthly values ( $\approx 15$  sampling months per site) to correspond  
496 with the temporal resolution of surveys in Kenya. In Kenya, we collected mosquitoes  
497 from approximately 20 houses per site (range = 1-47 houses across four sites) every  
498 month between January 2014 and October 2018 ( $\approx 54$  sampling months per site). In

499 Kenya, we also collected pupae, late instars, and early instars from containers with  
500 standing water around the home and collected eggs by setting ovitraps for an average of  
501 four days in and around each house monthly. We brought pupae, late and early instars,  
502 and eggs to the insectary and reared them to adulthood to classify individuals by sex and  
503 species. All mosquito traps capture a small portion of the true mosquito population;  
504 therefore, using consistent trapping methods at the same locations through time allows us  
505 to compare relative mosquito population dynamics across study sites rather than the  
506 absolute magnitude of mosquito abundances.

507

508 Arboviral surveys

509 For Ecuador, we analyzed laboratory-confirmed dengue, chikungunya, and Zika cases  
510 provided by the Ministry of Health (MoH) of Ecuador. The MoH collects serum samples  
511 from a subset of people with suspected arbovirus infections, and samples are tested at the  
512 National Public Health Research Institute by molecular diagnostics (RT-PCR) or  
513 antibody tests (IgM ELISA for dengue), depending on the number of days of illness.  
514 Results are sent to the MoH Epidemiological Surveillance and Control National  
515 Directorate (SIVE Alerta system). Laboratory-confirmed dengue cases were available for  
516 all four sites from 2014 to 2018. Laboratory-confirmed chikungunya cases were available  
517 for Machala and Huaquillas from 2015 to 2018. Laboratory-confirmed Zika cases were  
518 available for Machala from 2016 to 2018.

519

520 For Kenya, we used laboratory-confirmed dengue cases aggregated by site and month  
521 between 2014 and 2018 collected in a passive surveillance study on childhood febrile

522 illness in Kenya (NIH R01AI102918, PI: ADL). The study population consisted of 7,653  
523 children less than 18 years of age with undifferentiated febrile illness. Children with fever  
524 enrolled in the study when attending outpatient care in one of the four study sites (Mbaka  
525 Oromo Health Centre in Chulaimbo, Obama Children’s Hospital in Kisumu, Msambweni  
526 District Hospital in Msambweni, and Ukunda/Diani Health Center in Ukunda). Local  
527 health officers collected comprehensive clinical and demographic data and phlebotomy at  
528 the initial visit. We tested each child’s blood for dengue viremia by molecular diagnostics  
529 (conventional PCR [75] or targeted multiplexed real-time PCR when available [76]), or  
530 serologic conversion between an initial and a follow up visit (IgG ELISA [77]).

531

532 For arboviral data collection in Ecuador and Kenya, participants provided consent and all  
533 local and institutional protocols were followed.

534

535 SEI-SEIR model

536 We adapted an SEI-SEIR model parameterized for dengue transmission in *Ae. aegypti*  
537 mosquitoes [30] to simulate mosquito abundance and arboviral cases through time based  
538 on daily weather conditions in eight study locations. The model (equations 3-9; Fig. 2),  
539 created independently from the observed data described above, allows mosquito life  
540 history traits and viral development rate to vary with temperature ( $T$ ) following [30],  
541 mosquito carrying capacity to vary with accumulated 14-day rainfall ( $R$ ) following [72],  
542 and mosquito mortality to vary with humidity (i.e., saturation vapor pressure deficit) ( $H$ )  
543 following [73].

544

$$\frac{dS_m}{dt} = \varphi(T, H) * \frac{1}{\mu(T, H)} * N_m * \left(1 - \frac{N_m}{K(T, R, H)}\right) - \left(a(T) * pMI(T) * \frac{I_h}{N_h} + \mu(T, H)\right) * S_m \quad (3)$$

$$\frac{dE_m}{dt} = a(T) * pMI(T) * \frac{I_h}{N_h} * S_m - (PDR(T) + \mu(T, H)) * E_m \quad (4)$$

$$\frac{dI_m}{dt} = PDR(T) * E_m - \mu(T, H) * I_m \quad (5)$$

$$\frac{dS_h}{dt} = -a(T) * b(T) * \frac{I_m}{N_h} * S_h + BR * S_h - DR * S_h + ie * N_h - ie * S_h \quad (6)$$

$$\frac{dE_h}{dt} = a(T) * b(T) * \frac{I_m}{N_h} * S_h - \delta * E_h - DR * E_h - ie * E_h \quad (7)$$

$$\frac{dI_h}{dt} = \delta * E_h - \eta * I_h - DR * I_h - ie * I_h \quad (8)$$

$$\frac{dR_h}{dt} = \eta * I_h - DR * R_h - ie * R_h \quad (9)$$

545

546 where

$$\varphi(T, H) = EFD(T) * pEA(T) * MDR(T) \quad (10)$$

547 The adult mosquito population ( $N_m$ ) is separated into susceptible ( $S_m$ ), exposed ( $E_m$ ), and  
 548 infectious ( $I_m$ ) compartments and the human population ( $N_h$ ) is separated into susceptible  
 549 ( $S_h$ ), exposed ( $E_h$ ), infectious ( $I_h$ ), and recovered ( $R_h$ ) compartments (Fig. 2). Climate-  
 550 independent model parameters (Table 3) include the intrinsic incubation period ( $\delta$ ),  
 551 human infectivity period ( $\eta$ ), birth rate ( $BR$ ), death rate ( $DR$ ), and immigration/emigration  
 552 rate ( $ie$ ). The temperature-dependent SEI-SEIR model was developed by Huber et al. [30]  
 553 and allows mosquito life history traits and viral development rate to vary according to  
 554 thermal response curves fit from data derived in laboratory experiments conducted at  
 555 constant temperatures (Table 3). Although laboratory experiments do not reflect real-  
 556 world conditions, the physiological responses measured are biologically meaningful. The  
 557 temperature-dependent traits include eggs laid per female per day ( $EFD$ ), the probability of  
 558 egg-to-adult survival ( $pEA$ ), mosquito development rate ( $MDR$ ), mosquito mortality rate  
 559 ( $\text{lifespan}^{-1}$ ;  $\mu$ ), biting rate ( $a$ ), probability of mosquito infection per bite on an infectious

560 host ( $p_{MI}$ ), parasite development rate ( $PDR$ ), and probability of mosquito infectiousness  
 561 given an infectious bite ( $b$ ). We modified the mosquito mortality rate equation to vary as  
 562 a function of temperature and humidity by fitting a spline model based on a pooled  
 563 survival analysis of *Ae. aegypti* [73] (Fig. S9):

$$\mu(T, H) = \frac{1}{c * (T - T_0) * (T - T_m)} + (1 - (0.01 + 2.01 * H)) * y \quad H < 1 \quad (11)$$

$$\mu(T, H) = \frac{1}{c * (T - T_0) * (T - T_m)} + (1 - (1.22 + 0.27 * H)) * y \quad H \geq 1 \quad (12)$$

564 where the rate constant ( $c$ ), minimum temperature ( $T_0$ ), and maximum temperature ( $T_m$ )  
 565 equal -1.24, 16.63, and 31.85 respectively (Table 4), humidity ( $H$ ) is the saturation vapor  
 566 pressure deficit, and  $y$  is a scaling factor that we set to 0.005 and 0.01, respectively, to  
 567 restrict mosquito mortality rates within the range of mortality rates estimated by other  
 568 studies [19,73]. The linear humidity function has a steeper slope at lower humidity values  
 569 (equation 11) compared with higher humidity values (equation 12) based on previous  
 570 research [73] (Fig. S9).

571

572 We modeled adult mosquito carrying capacity,  $K$ , as a modified Arrhenius equation  
 573 following [30,78]:

$$K(T, H, R) = \frac{EFD(T_0) * pEA(T_0) * MDR(T_0) * \mu(T_0, H_0)^{-1} - \mu(T_0, H_0)}{EFD(T_0) * pEA(T_0) * MDR(T_0) * \mu(T_0, H_0)^{-1}} * N_{m.max} \quad (13)$$

$$* e^{\frac{-E_A * (T - T_0)^2}{K_B * (T + 273) * (T_0 + 273)}} * f(R)$$

574 with  $T_0$  and  $H_0$  set to the temperature and humidity where carrying capacity is greatest (i.e.,  
 575 physiological optimal conditions from laboratory experiments; 29°C and 6 kPA),  $N_{m.max}$   
 576 set to the maximum possible mosquito abundance in a population (twice the human  
 577 population size following [30]), and the Boltzmann constant, ( $K_B$ ), is  $8.617 \times 10^{-5}$  eV/K.

578 We set the activation energy,  $E_A$ , as 0.05 based on [30]. Since there were no experimental  
579 data from which to derive the functional response of mosquito carrying capacity across a  
580 gradient of rainfall values, we tested several functional relationships based on  
581 hypothesized biological relationships between freshwater availability and immature  
582 mosquito breeding habitat, modeling the effect of rainfall on carrying capacity,  $f(R)$ , as  
583 either:

$$f(R_{\text{Brière}}) = c * R * (R - R_{\text{min}}) * \sqrt{(R_{\text{max}} - R)} * z \quad (14)$$

$$f(R_{\text{Quadratic}}) = c * (R - R_{\text{min}}) * (R - R_{\text{max}}) * z \quad (15)$$

$$f(R_{\text{Inverse}}) = \frac{1}{R} * z \quad (16)$$

584 where minimum rainfall ( $R_{\text{min}}$ ) equaled 1 mm and maximum rainfall ( $R_{\text{max}}$ ) equaled 123  
585 mm based on the high probability of flushing [26]. The quadratic function is similar to  
586 the rainfall function found in [26] and the inverse function is based on the rainfall  
587 function used in [72]. We used rate constants ( $c$ ) of  $7.86e^{-5}$  and  $-5.99e^{-3}$  for the Brière and  
588 quadratic functions respectively, based on rate constants for other parameters with similar  
589 functional forms (Table 4). We also included a scaling factor,  $z$  (0.28, 0.025, and 0.60  
590 respectively), to restrict the maximum carrying capacity to produce model outputs based  
591 on a subsample of the total population for comparison with observations. Since the rate  
592 constant,  $c$ , is multiplied by  $z$ , inferring the exact value of  $c$  is not necessary because it is  
593 scaled by  $z$ . The scaling factor could be removed from the model to simulate dynamics in  
594 the total population.

595

596

597



598 **Table 3: Values of temperature-invariant parameters used in the model.** We derived  
599 daily birth and death rates in the model by dividing the per capita birth and death rates by  
600 360 days. The World Bank Open Data can be found at <https://data.worldbank.org/>.

| Parameter     | Definition                          | Value                              | Source                      |
|---------------|-------------------------------------|------------------------------------|-----------------------------|
| $\delta^{-1}$ | Intrinsic incubation period (days)  | 5.9                                | [30]                        |
| $\eta^{-1}$   | Human infectivity period (days)     | 5.0                                | [30]                        |
| <i>BR</i>     | Annual birth rate (per 1000 people) | 31.782 (Ecuador)<br>20.175 (Kenya) | The World Bank<br>Open Data |
| <i>DR</i>     | Annual death rate (per 1000 people) | 5.284 (Ecuador)<br>5.121 (Kenya)   | The World Bank<br>Open Data |
| <i>ie</i>     | Immigration/emigration rate         | 0.01                               | Expert opinion              |

601

602

603

604

605

606

607

608

609

610

611

612

613

614 **Table 4: Fitted thermal responses for *Ae. aegypti* life history traits.** Traits were fit to a  
 615 Brière [ $cT(T - T_0)(T_m - T)^{\frac{1}{2}}$ ] or a quadratic [ $c(T - T_m)(T - T_0)$ ] function where  $T$   
 616 represents temperature.  $T_0$  and  $T_m$  are the critical thermal minimum and maximum,  
 617 respectively, and  $c$  is the rate constant. Thermal responses were fit by [19] and also used  
 618 in [30]. Parasite development rate was measured as the virus extrinsic incubation rate.

| Trait      | Definition                                                  | Function  | c                       | T <sub>0</sub> | T <sub>m</sub> |
|------------|-------------------------------------------------------------|-----------|-------------------------|----------------|----------------|
| <i>a</i>   | Biting rate (day <sup>-1</sup> )                            | Brière    | 2.71x10 <sup>-04</sup>  | 14.67          | 41.00          |
| <i>EFD</i> | Eggs laid per female per day                                | Brière    | 2.08x10 <sup>-02</sup>  | 14.06          | 32.03          |
| <i>pEA</i> | Probability of mosquito egg-to-adult survival               | Quadratic | -3.36x10 <sup>-03</sup> | 7.68           | 38.31          |
| <i>MDR</i> | Mosquito egg-to-adult development rate (day <sup>-1</sup> ) | Brière    | 1.49x10 <sup>-04</sup>  | 15.12          | 37.67          |
| <i>Lf</i>  | Adult mosquito lifespan (days)                              | Quadratic | -1.24                   | 16.63          | 31.85          |
| <i>b</i>   | Probability of mosquito infectiousness                      | Brière    | 9.86x10 <sup>-04</sup>  | 12.05          | 32.79          |
| <i>pMI</i> | Probability of mosquito infection                           | Brière    | 5.23x10 <sup>-04</sup>  | 1.51           | 34.74          |
| <i>PDR</i> | Parasite development rate (day <sup>-1</sup> )              | Brière    | 1.04x10 <sup>-04</sup>  | 11.50          | 38.97          |

619  
 620 To initiate the model, we used site-specific values for human population size and  
 621 randomly selected one set of values for all sites for the proportion of mosquitoes and  
 622 humans in each compartment. For Ecuador, we used population estimates from official  
 623 population projections produced by Proyección de la Población Ecuatoriana, por años  
 624 calendario, según cantones 2010-2020  
 625 (<https://www.ecuadorencifras.gob.ec/proyecciones-poblacionales/>) with population sizes  
 626 of 57,366, 279,887, 13,673, and 25,615 for Huaquillas, Machala, Portovelo, and Zaruma,  
 627 respectively, based on 2017 projections. For Kenya, we estimated the population sizes

628 served by each outpatient care facility by creating a polygon around all the geolocations  
629 of study participants' homes enrolled at each outpatient care facility and summed  
630 population count data from NASA's Socioeconomic Data and Applications Center  
631 Gridded Population of the World v4 (<https://doi.org/10.7927/H4JW8BX5>) within each  
632 polygon using ArcGIS v 10.4.1. We estimated population sizes of 7,304, 547,557,  
633 240,698, and 154,048 for Chulaimbo, Kisumu, Msambweni, and Ukunda, respectively.  
634 We set the ratio of mosquitoes to humans to two, following [30]. We used the following  
635 values as the initial proportion of mosquitoes and humans in each model compartment:  
636  $S_m = 0.22$ ,  $E_m = 0.29$ ,  $I_m = 0.49$ ,  $S_h = 0.58$ ,  $E_h = 0.22$ ,  $I_h = 0.00$ , and  $R_h = 0.20$ . We  
637 determined that the model was invariant to initial proportion values after a short burn-in  
638 period (90 days) based on a sensitivity analysis (Fig. S10); therefore, we randomly  
639 selected one set of initial proportion values from the sensitivity analysis for all the model  
640 simulations. We also determined that the temporal trajectories of model dynamics did not  
641 change when we varied the critical thermal minimum, maximum, and rate constants  
642 (Table 4) for *Aedes aegypti* life history traits (Fig. S1-2).

643

644 We ran all model simulations using the deSolve package in R statistical software v 3.5.3  
645 [79].

646

647 Model validation

648 To validate the SEI-SEIR model, we calculated pairwise correlations with an adjusted p-  
649 value to account for autocorrelation for each site. For the pairwise correlations, we used  
650 the ccf function in base R [79] to calculate correlations between the two times series of

651 model predictions and observations with 0, 1, 2, 3, 4, and 5-month lags. We then  
652 calculated an adjusted p-value using the Modified Chelton method [45] to adjust the null  
653 hypothesis test of sample correlation between autocorrelated time series. To assess  
654 predictions and observations for vector dynamics for each site, we compared monthly  
655 time series of the total predicted mosquito population from the SEI-SEIR model with the  
656 monthly time series of mean number of *Aedes aegypti* (per house). We followed the same  
657 procedure to compare model predictions with other mosquito life stages for sites in  
658 Kenya. Similarly, to compare predictions and observations for human disease dynamics  
659 for each site, we compared monthly times series of predicted infected individuals from  
660 the SEI-SEIR model with the monthly time series of total laboratory-confirmed arboviral  
661 cases. For subsequent analyses, we used model predictions from the model (e.g., SEI-  
662 SEIR model with a specific rainfall function and time lag) with the highest pairwise  
663 correlation value.

664

665 To compare key epidemic characteristics between model predictions and observations  
666 and to compare site-specific correlations with socio-economic factors, we used linear  
667 regression models using the `lm` function in that stats package in R [79]. We defined  
668 outbreaks as a continuous time period where the peak cases exceeded the mean number  
669 of cases (predicted or observed) plus one standard deviation within a site. We then used  
670 those outbreak periods to count the total number of outbreaks within each site, and, for  
671 predicted and observed outbreaks that overlapped in time, the duration, peak timing total  
672 outbreak size, and maximum number of infections. We compared predictions and  
673 observations for each of these metrics with linear regression. Since we were interested in

674 whether model predictions matched observations for each independent outbreak period,  
675 we did not allow varying intercepts or slopes by site. Similarly, we compared the  
676 pairwise correlation values (described above) across all sites with each socio-economic  
677 factor listed in Table 1 separately using linear regressions.

678

679 **Comparison of  $R_0$  with prior studies**

680 We collected effect sizes of temperature on dengue incidence from 12 peer-reviewed  
681 studies from the literature (Table S1). We selected studies with mean temperatures across  
682 the predicted temperature range where arboviral transmission can occur. We scaled the  
683 coefficient values to visualize the relative effect of temperature across studies given that  
684 the original analyses were conducted with different temperature metrics and across  
685 different temperature ranges. We provide additional information and sources in Table S1.

686

687 **Data availability statement:** Climate data, epidemic characteristics data, and socio-  
688 economic data are available at [https://github.com/jms5151/SEI-SEIR\\_Arboviruses](https://github.com/jms5151/SEI-SEIR_Arboviruses). We  
689 used this data to create figures 3, 4, and 6 in the main text and supplemental figures 1-3  
690 and 6-10; we provide the data used in figure 7 in supplemental table 1. We can provide  
691 vector and arboviral case data upon request with permission from appropriate data  
692 providers (e.g., Ecuador Ministry of Health).

693

694 **Code availability:** Model and analysis codes are available at

695 [https://github.com/jms5151/SEI-SEIR\\_Arboviruses](https://github.com/jms5151/SEI-SEIR_Arboviruses).

696

697 **Acknowledgements:** JMC, ADL, EFL, and EAM were supported by a Stanford Woods  
698 Institute for the Environment – Environmental Ventures Program grant (PIs: EAM, ADL,  
699 and EFL). EAM was also supported by a Hellman Faculty Fellowship and a Terman  
700 Award. ADL, BAN, FMM, ENGS, MSS, ARK, RD, AA, and HNN were supported by a  
701 National Institutes of Health R01 grant (AI102918; PI: ADL). EAM, AMSI, and SJR  
702 were supported by a National Science Foundation (NSF) Ecology and Evolution of  
703 Infectious Diseases (EEID) grant (DEB-1518681) and AMSI and SJR were also  
704 supported by an NSF DEB RAPID grant (1641145). EAM was also supported by a  
705 National Institute of General Medical Sciences Maximizing Investigators’ Research  
706 Award grant (R35GM133439) and an NSF and Fogarty International Center EEID grant  
707 (DEB-2011147). We thank Cat Lippi for assistance with formatting household quality  
708 survey data from Ecuador.

709

710 **Author contributions:** EAM, ADL, EFL, and JMC conceived of project. JMC  
711 conducted analyses and wrote manuscript. EAM, ADL, EFL, and AMSI secured funding  
712 for the project. BNN, FMM, EBA, AA, MJBC, RD, FHH, RM, and HNN collected data.  
713 ENGS and MMS conducted laboratory analyses. ARK, SJR, and RS processed data. All  
714 authors revised and approved of the manuscript.

715

716

717

718

719

720 **References:**

- 721 1. Ockendon N, Baker DJ, Carr JA, White EC, Almond REA, Amano T, et al.  
722 Mechanisms underpinning climatic impacts on natural populations: altered species  
723 interactions are more important than direct effects. *Glob Chang Biol.* 2014;20:  
724 2221–2229. doi:10.1111/gcb.12559
- 725 2. Boggs CL, Inouye DW. A single climate driver has direct and indirect effects on  
726 insect population dynamics. *Ecol Lett.* 2012;15: 502–508. doi:10.1111/j.1461-  
727 0248.2012.01766.x
- 728 3. Burkett VR, Wilcox DA, Stottlemeyer R, Barrow W, Fagre D, Baron J, et al.  
729 Nonlinear dynamics in ecosystem response to climatic change: Case studies and  
730 policy implications. *Ecol Complex.* 2005;2: 357–394.  
731 doi:10.1016/j.ecocom.2005.04.010
- 732 4. Molnár PK, Sckrabulis JP, Altman KA, Raffel TR. Thermal Performance Curves  
733 and the Metabolic Theory of Ecology—A Practical Guide to Models and  
734 Experiments for Parasitologists. *J Parasitol.* 2017;103. doi:10.1645/16-148
- 735 5. Hortion J, Mutuku FM, Eyherabide AL, Vu DM, Boothroyd DB, Grossi-Soyster  
736 EN, et al. Acute Flavivirus and Alphavirus Infections among Children in Two  
737 Different Areas of Kenya, 2015. *Am J Trop Med Hyg.* 2019;100: 170–173.  
738 doi:10.4269/ajtmh.18-0297
- 739 6. Stewart-Ibarra AM, Lowe R. Climate and Non-Climate Drivers of Dengue  
740 Epidemics in Southern Coastal Ecuador. *Am J Trop Med Hyg.* 2013;88: 971–981.  
741 doi:10.4269/ajtmh.12-0478
- 742 7. Jury MR. Climate influence on dengue epidemics in Puerto Rico. *Int J Environ*

- 743 Health Res. 2008;18: 323–334. doi:10.1080/09603120701849836
- 744 8. Campbell KM, Haldeman K, Lehnig C, Munayco C V., Halsey ES, Laguna-Torres  
745 VA, et al. Weather Regulates Location, Timing, and Intensity of Dengue Virus  
746 Transmission between Humans and Mosquitoes. Michael E, editor. PLoS Negl  
747 Trop Dis. 2015;9: e0003957. doi:10.1371/journal.pntd.0003957
- 748 9. Adde A, Roucou P, Mangeas M, Ardillon V, Desenclos J-C, Rousset D, et al.  
749 Predicting Dengue Fever Outbreaks in French Guiana Using Climate Indicators.  
750 Scarpino S V., editor. PLoS Negl Trop Dis. 2016;10: e0004681.  
751 doi:10.1371/journal.pntd.0004681
- 752 10. Dhimal M, Gautam I, Joshi HD, O’Hara RB, Ahrens B, Kuch U, et al. Risk  
753 Factors for the Presence of Chikungunya and Dengue Vectors (*Aedes aegypti* and  
754 *Aedes albopictus*), Their Altitudinal Distribution and Climatic Determinants of  
755 Their Abundance in Central Nepal. Turell MJ, editor. PLoS Negl Trop Dis.  
756 2015;9: e0003545. doi:10.1371/journal.pntd.0003545
- 757 11. Descloux E, Mangeas M, Menkes CE, Lengaigne M, Leroy A, Tehei T, et al.  
758 Climate-Based Models for Understanding and Forecasting Dengue Epidemics.  
759 Anyamba A, editor. PLoS Negl Trop Dis. 2012;6: e1470.  
760 doi:10.1371/journal.pntd.0001470
- 761 12. Aswi A, Cramb SM, Moraga P, Mengersen K. Epidemiology and Infection  
762 Bayesian spatial and spatio-temporal approaches to modelling dengue fever: a  
763 systematic review. Epidemiol Infect. 2018;147. doi:10.1017/S0950268818002807
- 764 13. Johansson MA, Apfeldorf KM, Dobson S, Devita J, Buczak AL, Baugher B, et al.  
765 An open challenge to advance probabilistic forecasting for dengue epidemics. Proc



- 766 Natl Acad Sci. 2019; 201909865. doi:10.1073/pnas.1909865116
- 767 14. Michael E, Singh BK, Mayala BK, Smith ME, Hampton S, Nabrzyski J.  
768 Continental-scale, data-driven predictive assessment of eliminating the vector-  
769 borne disease, lymphatic filariasis, in sub-Saharan Africa by 2020. BMC Med.  
770 2017;15: 176. doi:10.1186/s12916-017-0933-2
- 771 15. Smith T, Maire N, Ross A, Penny M, Chitnis N, Schapira A, et al. Towards a  
772 comprehensive simulation model of malaria epidemiology and control.  
773 Parasitology. 2008. pp. 1507–1516. doi:10.1017/S0031182008000371
- 774 16. Ryan SJ, Carlson CJ, Mordecai EA, Johnson LR. Global expansion and  
775 redistribution of Aedes-borne virus transmission risk with climate change. Han  
776 BA, editor. PLoS Negl Trop Dis. 2019;13: e0007213.  
777 doi:10.1371/journal.pntd.0007213
- 778 17. Kraemer MU, Sinka ME, Duda KA, Mylne AQ, Shearer FM, Barker CM, et al.  
779 The global distribution of the arbovirus vectors *Aedes aegypti* and *Ae. albopictus*.  
780 Elife. 2015;4. doi:10.7554/eLife.08347
- 781 18. Powell JR, Tabachnick WJ, Powell JR, Tabachnick WJ. History of domestication  
782 and spread of *Aedes aegypti* - A Review. Mem Inst Oswaldo Cruz. 2013;108: 11–  
783 17. doi:10.1590/0074-0276130395
- 784 19. Mordecai EA, Cohen JM, Evans M V., Gudapati P, Johnson LR, Lippi CA, et al.  
785 Detecting the impact of temperature on transmission of Zika, dengue, and  
786 chikungunya using mechanistic models. Althouse B, editor. PLoS Negl Trop Dis.  
787 2017;11: e0005568. doi:10.1371/journal.pntd.0005568
- 788 20. Shocket MS, Ryan SJ, Mordecai EA. Temperature explains broad patterns of Ross

- 789 River virus transmission. *Elife*. 2018; doi:10.7554/eLife.37762.001
- 790 21. Paull SH, Horton DE, Ashfaq M, Rastogi D, Kramer LD, Diffenbaugh NS, et al.  
791 Drought and immunity determine the intensity of West Nile virus epidemics and  
792 climate change impacts. *Proc R Soc B Biol Sci*. 2017;284: 20162078.  
793 doi:10.1098/rspb.2016.2078
- 794 22. Costa EAP de A, Santos EM de M, Correia JC, Albuquerque CMR de. Impact of  
795 small variations in temperature and humidity on the reproductive activity and  
796 survival of *Aedes aegypti* (Diptera, Culicidae). *Rev Bras Entomol*. 2010;54: 488–  
797 493. doi:10.1590/S0085-56262010000300021
- 798 23. Gaaboub IA, El-Sawaf SK, El-Latif MA. Effect of Different Relative Humidities  
799 and Temperatures on Egg-Production and Longevity of Adults of *Anopheles*  
800 (*Myzomyia*) *pharoensis* Theob.1. *Zeitschrift für Angew Entomol*. 2009;67: 88–94.  
801 doi:10.1111/j.1439-0418.1971.tb02098.x
- 802 24. Koenraadt CJM, Harrington LC. Flushing Effect of Rain on Container-Inhabiting  
803 Mosquitoes *Aedes aegypti* and *Culex pipiens* (Diptera: Culicidae). *J Med Entomol*.  
804 2009;45: 28–35. doi:10.1603/0022-2585(2008)45[28:FEOROC]2.0.CO;2
- 805 25. Paaajmans KP, Wandago MO, Githeko AK, Takken W, Vulule J. Unexpected High  
806 Losses of *Anopheles gambiae* Larvae Due to Rainfall. Carter D, editor. *PLoS One*.  
807 2007;2: e1146. doi:10.1371/journal.pone.0001146
- 808 26. Benedum CM, Seidahmed OME, Eltahir EAB, Markuzon N. Statistical modeling  
809 of the effect of rainfall flushing on dengue transmission in Singapore. Reiner RC,  
810 editor. *PLoS Negl Trop Dis*. 2018;12: e0006935.  
811 doi:10.1371/journal.pntd.0006935

- 812 27. Stewart Ibarra AM, Ryan SJ, Beltrán E, Mejía R, Silva M, Muñoz Á. Dengue  
813 Vector Dynamics (*Aedes aegypti*) Influenced by Climate and Social Factors in  
814 Ecuador: Implications for Targeted Control. Mores CN, editor. PLoS One. 2013;8:  
815 e78263. doi:10.1371/journal.pone.0078263
- 816 28. Pontes RJ, Spielman A, Oliveira-Lima JW, Hodgson JC, Freeman J. Vector  
817 densities that potentiate dengue outbreaks in a Brazilian city. Am J Trop Med Hyg.  
818 2000;62: 378–383. doi:10.4269/ajtmh.2000.62.378
- 819 29. Anyamba A, Linthicum KJ, Small JL, Collins KM, Tucker CJ, Pak EW, et al.  
820 Climate Teleconnections and Recent Patterns of Human and Animal Disease  
821 Outbreaks. Zhou X-N, editor. PLoS Negl Trop Dis. 2012;6: e1465.  
822 doi:10.1371/journal.pntd.0001465
- 823 30. Huber JH, Childs ML, Caldwell JM, Mordecai EA. Seasonal temperature variation  
824 influences climate suitability for dengue, chikungunya, and Zika transmission.  
825 Althouse B, editor. PLoS Negl Trop Dis. 2018;12: e0006451.  
826 doi:10.1371/journal.pntd.0006451
- 827 31. Lourenço J, Recker M. The 2012 Madeira Dengue Outbreak: Epidemiological  
828 Determinants and Future Epidemic Potential. Scarpino S V., editor. PLoS Negl  
829 Trop Dis. 2014;8: e3083. doi:10.1371/journal.pntd.0003083
- 830 32. Li R, Xu L, Bjørnstad ON, Liu K, Song T, Chen A, et al. Climate-driven variation  
831 in mosquito density predicts the spatiotemporal dynamics of dengue. Proc Natl  
832 Acad Sci. 2019;119: 3624–3629. doi:10.1073/PNAS.1806094116
- 833 33. Wang X, Tang S, Cheke RA. A stage structured mosquito model incorporating  
834 effects of precipitation and daily temperature fluctuations. J Theor Biol. 2016;411:

- 835 27–36. doi:10.1016/j.jtbi.2016.09.015
- 836 34. Siraj AS, Oidtman RJ, Huber JH, Kraemer MUG, Brady OJ, Johansson MA, et al.  
837 Temperature modulates dengue virus epidemic growth rates through its effects on  
838 reproduction numbers and generation intervals. Althouse B, editor. PLoS Negl  
839 Trop Dis. 2017;11: e0005797. doi:10.1371/journal.pntd.0005797
- 840 35. Oidtman RJ, Lai S, Huang Z, Yang J, Siraj AS, Reiner RC, et al. Inter-annual  
841 variation in seasonal dengue epidemics driven by multiple interacting factors in  
842 Guangzhou, China. Nat Commun. 2019;10. doi:10.1038/s41467-019-09035-x
- 843 36. Stewart-Ibarra AM, Muñoz ÁG, Ryan SJ, Ayala EB, Borbor-Cordova MJ,  
844 Finkelstein JL, et al. Spatiotemporal clustering, climate periodicity, and social-  
845 ecological risk factors for dengue during an outbreak in Machala, Ecuador, in  
846 2010. BMC Infect Dis. 2014;14: 610. doi:10.1186/s12879-014-0610-4
- 847 37. Agha SB, Tchouassi DP, Turell MJ, Bastos ADS, Sang R. Entomological  
848 assessment of dengue virus transmission risk in three urban areas of Kenya. Reiner  
849 RC, editor. PLoS Negl Trop Dis. 2019;13: e0007686.  
850 doi:10.1371/journal.pntd.0007686
- 851 38. Agha SB, Tchouassi DP, Bastos ADS, Sang R. Dengue and yellow fever virus  
852 vectors: seasonal abundance, diversity and resting preferences in three Kenyan  
853 cities. Parasit Vectors. 2017;10: 628. doi:10.1186/s13071-017-2598-2
- 854 39. Chretien J-P, Anyamba A, Bedno SA, Breiman RF, Sang R, Serгон K, et al.  
855 Drought-Associated Chikungunya Emergence Along Coastal East Africa. Am J  
856 Trop Med Hyg. 2007;76: 405–407. doi:10.4269/ajtmh.2007.76.405
- 857 40. Vu DM, Mutai N, Heath CJ, Vulule JM, Mutuku FM, Ndenga BA, et al.

- 858 Unrecognized Dengue Virus Infections in Children, Western Kenya, 2014-2015.  
859 *Emerg Infect Dis.* 2017;23: 1915–1917. doi:10.3201/eid2311.170807
- 860 41. Gubler DJ, Nalim S, Saroso JS, Saipan H, Tan R. Variation in Susceptibility to  
861 Oral Infection with Dengue Viruses among Geographic Strains of *Aedes Aegypti*  
862 \*. *Am J Trop Med Hyg.* 1979;28: 1045–1052. doi:10.4269/ajtmh.1979.28.1045
- 863 42. Xavier-Carvalho C, Chester Cardoso C, de Souza Kehdya F, Guilherme Pacheco  
864 A, Ozório Moraes M. Host genetics and dengue fever. *Infect Genet Evol.*  
865 2017;56: 99–110. doi:10.1016/J.MEEGID.2017.11.009
- 866 43. Didan K, Barreto Munoz A, Solano R, Huete A. MODIS Vegetation Index User’s  
867 Guide (MOD13 Series) [Internet]. Available: <http://vip.arizona.edu>
- 868 44. Sulla-Menashe D, Friedl MA. User Guide to Collection 6 MODIS Land Cover  
869 (MCD12Q1 and MCD12C1) Product. 2018; doi:10.5067/MODIS/MCD12Q1
- 870 45. Pyper BJ, Peterman RM. Comparison of methods to account for autocorrelation in  
871 correlation analyses of fish data. *Can J Fish Aquat Sci.* 1998;55: 2127–2140.  
872 doi:10.1139/f98-104
- 873 46. Shocket MS, Anderson CB, Caldwell JM, Childs ML, Han S, Harris M, et al.  
874 Environmental drivers of vector-borne disease. *Population Biology of Vector-*  
875 *borne Diseases.* Oxford University Press;
- 876 47. Hurtado-Daz M, Riojas-Rodríguez H, Rothenberg S, Gomez-Dantes H, Cifuentes  
877 E. Impact of climate variability on the incidence of dengue in Mexico. *Trop Med*  
878 *Int Heal.* 2007;12. doi:10.1111/j.1365-3156.2007.01930.x
- 879 48. Colón-González FJ, Bentham G, Lake IR. Climate Variability and Dengue Fever  
880 in Warm and Humid Mexico. *Am J Trop Med Hyg.* 2011;84: 757–763.

- 881           doi:10.4269/ajtmh.2011.10-0609
- 882   49.   Wang C, Jiang B, Fan J, Wang F, Liu Q. A Study of the Dengue Epidemic and  
883           Meteorological Factors in Guangzhou, China, by Using a Zero-Inflated Poisson  
884           Regression Model. *Asia Pacific J Public Heal.* 2014;26: 48–57.  
885           doi:10.1177/1010539513490195
- 886   50.   Minh An DT, Rocklöv J. Epidemiology of dengue fever in Hanoi from 2002 to  
887           2010 and its meteorological determinants. *Glob Health Action.* 2014;7: 23074.  
888           doi:10.3402/gha.v7.23074
- 889   51.   Laureano-Rosario AE, Garcia-Rejon JE, Gomez-Carro S, Farfan-Ale JA, Muller-  
890           Kargera FE. Modelling dengue fever risk in the State of Yucatan, Mexico using  
891           regional-scale satellite-derived sea surface temperature. *Acta Trop.* 2017;172: 50–  
892           57. doi:10.1016/j.actatropica.2017.04.017
- 893   52.   Wu P-C, Guoa H-R, Lung S-C, Lin C-Y, Su H-J. Weather as an effective predictor  
894           for occurrence of dengue fever in Taiwan. *Acta Trop.* 2007;103: 50–57.  
895           doi:10.1016/j.actatropica.2007.05.014
- 896   53.   Karim MN, Munshi SU, Anwar N, Alam MS. Climatic factors influencing dengue  
897           cases in Dhaka city: a model for dengue prediction. *Indian J Med Res.* 2012;136:  
898           32–9. Available: <http://www.ncbi.nlm.nih.gov/pubmed/22885261>
- 899   54.   Nakhapakorn K, Tripathi N. An information value based analysis of physical and  
900           climatic factors affecting dengue fever and dengue haemorrhagic fever incidence.  
901           *Int J Health Geogr.* 2005;4: 13. doi:10.1186/1476-072X-4-13
- 902   55.   Gharbi M, Quenel P, Gustave J, Cassadou S, Ruche G La, Girdary L, et al. Time  
903           series analysis of dengue incidence in Guadeloupe, French West Indies:

- 904           Forecasting models using climate variables as predictors. *BMC Infect Dis.*  
905           2011;11: 166. doi:10.1186/1471-2334-11-166
- 906   56.   Sharmin S, Glass K, Viennet E, Harley D. Interaction of Mean Temperature and  
907   Daily Fluctuation Influences Dengue Incidence in Dhaka, Bangladesh. Kasper M,  
908   editor. *PLoS Negl Trop Dis.* 2015;9: e0003901. doi:10.1371/journal.pntd.0003901
- 909   57.   Sriprom M, Chalvet-Monfray K, Chaimane T, Vongsawat K, Bicout DJ. Monthly  
910   district level risk of dengue occurrences in Sakon Nakhon Province, Thailand. *Sci*  
911   *Total Environ.* 2010;408: 5521–5528. doi:10.1016/J.SCITOTENV.2010.08.024
- 912   58.   Martínez-Bello D, López-Quílez A, Prieto AT. Spatiotemporal modeling of  
913   relative risk of dengue disease in Colombia. *Stoch Environ Res Risk Assess.*  
914   2018;32: 1587–1601. doi:10.1007/s00477-017-1461-5
- 915   59.   Mordecai EA, Caldwell JM, Grossman MK, Lippi CA, Johnson LR, Neira M, et  
916   al. Thermal biology of mosquito-borne disease. Byers J (Jeb), editor. *Ecol Lett.*  
917   2019; ele.13335. doi:10.1111/ele.13335
- 918   60.   Carrington LB, Armijos MV, Lambrechts L, Barker CM, Scott TW. Effects of  
919   Fluctuating Daily Temperatures at Critical Thermal Extremes on *Aedes aegypti*  
920   Life-History Traits. *PLoS One.* 2013;8. doi:10.1371/journal.pone.0058824
- 921   61.   Ngugi HN, Mutuku FM, Ndenga BA, Musunzaji PS, Mbakaya JO, Aswani P, et al.  
922   Characterization and productivity profiles of *Aedes aegypti* (L.) breeding habitats  
923   across rural and urban landscapes in western and coastal Kenya. *Parasit Vectors.*  
924   2017;10: 331. doi:10.1186/s13071-017-2271-9
- 925   62.   Lowe R, Gasparrini A, Van Meerbeeck CJ, Lippi CA, Mahon R, Trotman AR, et  
926   al. Nonlinear and delayed impacts of climate on dengue risk in Barbados: A

- 927 modelling study. *PLoS Med.* 2018;15. doi:10.1371/journal.pmed.1002613
- 928 63. Li C, Wang X, Wu X, Liu J, Ji D, Du J. Modeling and projection of dengue fever  
929 cases in Guangzhou based on variation of weather factors. *Sci Total Environ.*  
930 2017;605–606: 867–873. doi:10.1016/j.scitotenv.2017.06.181
- 931 64. Li CF, Lim TW, Han LL, Fang R. Rainfall, abundance of *Aedes aegypti* and  
932 dengue infection in Selangor, Malaysia. *Southeast Asian J Trop Med Public*  
933 *Health.* 1985;16: 560–8. Available: <http://www.ncbi.nlm.nih.gov/pubmed/3835698>
- 934 65. Johansson MA, Dominici F, Glass GE. Local and Global Effects of Climate on  
935 Dengue Transmission in Puerto Rico. Massad E, editor. *PLoS Negl Trop Dis.*  
936 2009;3: e382. doi:10.1371/journal.pntd.0000382
- 937 66. Kenneson A, Beltrán-Ayala E, Borbor-Cordova MJ, Polhemus ME, Ryan SJ, Endy  
938 TP, et al. Social-ecological factors and preventive actions decrease the risk of  
939 dengue infection at the household-level: Results from a prospective dengue  
940 surveillance study in Machala, Ecuador. Messer WB, editor. *PLoS Negl Trop Dis.*  
941 2017;11: e0006150. doi:10.1371/journal.pntd.0006150
- 942 67. Reich NG, Shrestha S, King AA, Rohani P, Lessler J, Kalayanarooj S, et al.  
943 Interactions between serotypes of dengue highlight epidemiological impact of  
944 cross-immunity. *J R Soc Interface.* 2013;10: 20130414.  
945 doi:10.1098/rsif.2013.0414
- 946 68. Wen J, Elong Ngono A, Regla-Nava JA, Kim K, Gorman MJ, Diamond MS, et al.  
947 Dengue virus-reactive CD8+ T cells mediate cross-protection against subsequent  
948 Zika virus challenge. *Nat Commun.* 2017;8: 1459. doi:10.1038/s41467-017-  
949 01669-z



- 950 69. Rodriguez-Barraquer I, Salje H, Cummings DA. Opportunities for improved  
951 surveillance and control of dengue from age-specific case data. *Elife*. 2019;8.  
952 doi:10.7554/eLife.45474
- 953 70. Stoddard ST, Forshey BM, Morrison AC, Paz-Soldan VA, Vazquez-Prokopec  
954 GM, Astete H, et al. House-to-house human movement drives dengue virus  
955 transmission. *Proc Natl Acad Sci U S A*. 2013;110: 994–999.  
956 doi:10.1073/pnas.1213349110
- 957 71. Wesolowski A, Qureshi T, Boni MF, Sundsøy PR, Johansson MA, Rasheed SB, et  
958 al. Impact of human mobility on the emergence of dengue epidemics in Pakistan.  
959 *Proc Natl Acad Sci*. 2015;112: 11887–11892. doi:10.1073/pnas.1504964112
- 960 72. Vaidya A, Bravo-Salgado AD, Mikler AR. Modeling climate-dependent  
961 population dynamics of mosquitoes to guide public health policies. *Proc 5th ACM*  
962 *Conf Bioinformatics, Comput Biol Heal Informatics - BCB '14*. 2014; 380–389.  
963 doi:10.1145/2649387.2649415
- 964 73. Schmidt CA, Comeau G, Monaghan AJ, Williamson DJ, Ernst KC. Effects of  
965 desiccation stress on adult female longevity in *Aedes aegypti* and *Ae. albopictus*  
966 (Diptera: Culicidae): results of a systematic review and pooled survival analysis.  
967 *Parasit Vectors*. 2018;11: 267. doi:10.1186/s13071-018-2808-6
- 968 74. Vazquez-Prokopec GM, Galvin WA, Kelly R, Kitron U. A New, Cost-Effective,  
969 Battery-Powered Aspirator for Adult Mosquito Collections. *J Med Entomol*.  
970 2009;46: 1256–1259. doi:10.1603/033.046.0602
- 971 75. Waggoner JJ, Gresh L, Mohamed-Hadley A, Ballesteros G, Davila MJV, Tellez Y,  
972 et al. Single-Reaction Multiplex Reverse Transcription PCR for Detection of Zika,

- 973 Chikungunya, and Dengue Viruses. *Emerg Infect Dis*. 2016;22: 1295–7.  
974 doi:10.3201/eid2207.160326
- 975 76. Lanciotti RS, Calisher CH, Gubler DJ, Chang GJ, Vorndam A V. Rapid detection  
976 and typing of dengue viruses from clinical samples by using reverse transcriptase-  
977 polymerase chain reaction. *J Clin Microbiol*. 1992;30: 545–51. Available:  
978 <http://www.ncbi.nlm.nih.gov/pubmed/1372617>
- 979 77. Grossi-Soyster EN, Cook EAJ, de Glanville WA, Thomas LF, Krystosik AR, Lee  
980 J, et al. Serological and spatial analysis of alphavirus and flavivirus prevalence and  
981 risk factors in a rural community in western Kenya. Bingham A, editor. *PLoS Negl*  
982 *Trop Dis*. 2017;11: e0005998. doi:10.1371/journal.pntd.0005998
- 983 78. Palamara GM, Childs DZ, Clements CF, Petchey OL, Plebani M, Smith MJ.  
984 Inferring the temperature dependence of population parameters: The effects of  
985 experimental design and inference algorithm. *Ecol Evol*. 2014;4: 4736–4750.  
986 doi:10.1002/ece3.1309
- 987 79. Team RC. R: A Language and Environment for Statistical Computing. R Found  
988 Stat Comput. 2018; Available: <https://www.r-project.org>  
989
