1 Title: Climate predicts geographic and temporal variation in mosquito-borne disease  
2 dynamics on two continents

3

4 Jamie M. Caldwell<sup>1</sup>, A. Desiree LaBeaud<sup>2</sup>, Eric F. Lambin<sup>3,4</sup>, Anna M. Stewart-Ibarra<sup>5,6</sup>,  
5 Bryson A. Ndenga<sup>7</sup>, Francis M. Mutuku<sup>8</sup>, Amy R. Krystosik<sup>2</sup>, Efraín Beltrán Ayala<sup>9</sup>,  
6 Assaf Anyamba<sup>10</sup>, Mercy J. Borbor-Cordova<sup>11</sup>, Richard Damoah<sup>12</sup>, Elysse N. Grossi-  
7 Soyster<sup>2</sup>, Froilán Heras Heras<sup>13</sup>, Harun N. Ngugi<sup>14,15</sup>, Sadie J. Ryan<sup>16-18</sup>, Melisa M.  
8 Shah<sup>19</sup>, Rachel Sippy<sup>13,20,21</sup>, Erin A. Mordecai<sup>1</sup>

9

10 <sup>1</sup> Department of Biology, Stanford University, 371 Serra Mall, Stanford, California, USA

11 <sup>2</sup> Department of Pediatrics, Division of Infectious Diseases, Stanford University, 300  
12 Pasteur Drive, Stanford, California, USA

13 <sup>3</sup> School of Earth, Energy & Environmental Sciences, and Woods Institute for the  
14 Environment, Stanford University, Stanford, California 94305, USA.

15 <sup>4</sup> Georges Lemaître Earth and Climate Research Centre, Earth and Life Institute,  
16 Université catholique de Louvain, 1348 Louvain-la-Neuve, Belgium.

17 <sup>5</sup> Department of Medicine and Department of Public Health and Preventative Medicine,  
18 SUNY Upstate Medical University, Syracuse, NY, USA

19 <sup>6</sup> InterAmerican Institute for Global Change Research (IAI), Montevideo, Uruguay

20 <sup>7</sup> Centre for Global Health Research, Kenya Medical Research Institute, Kisumu, Kenya

21 <sup>8</sup> Department of environment and health sciences, technical university of Mombasa,  
22 Mombasa, Kenya

23 <sup>9</sup> Technical University of Machala, Machala, Ecuador

24 <sup>10</sup> Universities Space Research Association and NASA Goddard Space Flight Center,  
25 Greenbelt, MD, USA.

26 <sup>11</sup> Facultad de Ingeniería Marítima y Ciencias del Mar, Escuela Superior Politécnica del  
27 Litoral, ESPOL, Guayaquil, Ecuador

28 <sup>12</sup> Morgan State University and NASA Goddard Space Flight Center, Greenbelt, MD,  
29 USA.

30 <sup>13</sup> Center for Research SUNY-Upstate-Teófilo Dávila Hospital, Machala, Ecuador

31 <sup>14</sup> Department of Biological Sciences, Chuka University, Chuka, Kenya

32 <sup>15</sup> Department of Zoology, School of Biological Sciences University of Nairobi, Nairobi,  
33 Kenya

34 <sup>16</sup> Emerging Pathogens Institute, University of Florida, Gainesville, Florida

35 <sup>17</sup> Quantitative Disease Ecology and Conservation (QDEC) Lab, Department of  
36 Geography, University of Florida, Gainesville, Florida;

37 <sup>18</sup> School of Life Sciences, University of KwaZulu, Natal, South Africa

38 <sup>19</sup> Department of Medicine, Division of Infectious Diseases, Stanford University, 300  
39 Pasteur Drive, Stanford, California, USA

40 <sup>20</sup> Institute for Global Health and Translational Science, SUNY-Upstate Medical  
41 University, Syracuse, NY, USA

42 <sup>21</sup> Department of Medical Geography, University of Florida, Gainesville, FL, USA

43

44 Corresponding author email: [jamie.sziklay@gmail.com](mailto:jamie.sziklay@gmail.com)

45

46

47 Abstract:

48 Climate drives population dynamics through multiple mechanisms, which can lead to  
49 seemingly context-dependent effects of climate on natural populations. For climate-  
50 sensitive diseases such as dengue, chikungunya, and Zika, climate appears to have  
51 opposing effects in different contexts. Here we show that a model, parameterized with  
52 laboratory measured climate-driven mosquito physiology, captures three key epidemic  
53 characteristics across ecologically and culturally distinct settings in Ecuador and Kenya:  
54 the number, timing, and duration of outbreaks. The model generates a range of disease  
55 dynamics consistent with observed *Aedes aegypti* abundances and laboratory-confirmed  
56 arboviral incidence with variable accuracy (28 – 85% for vectors, 44 – 88% for  
57 incidence). The model predicted vector dynamics better in sites with a smaller proportion  
58 of young children in the population, lower mean temperature, and homes with piped  
59 water and made of cement. Models with limited calibration that robustly capture climate-  
60 virus relationships can help guide intervention efforts and climate change disease  
61 projections.

62

63 Introduction:

64 Climate is a major driver of species interactions and population dynamics, but the  
65 mechanisms underlying the ecological effects of climate are often poorly understood and  
66 rarely tested in the field [1]. One of the primary ways that climate impacts populations is  
67 through its effects on species' vital rates [2]. However, the effects of climate on  
68 population dynamics may appear context dependent in the field because multiple climate  
69 variables can act synergistically, with each climate variable potentially affecting multiple

70 vital rates, and their impacts may be nonlinear, changing direction and relative  
71 importance across a gradient of conditions [3,4]. Therefore, paradoxically, while climate  
72 is thought to be one of the most pervasive drivers of ecological processes, its directional  
73 and dynamical effects on systems are often poorly understood and difficult to predict.  
74 Vector-borne diseases provide an interesting case study to test whether climate sensitive  
75 traits measured in controlled, laboratory settings can reproduce the wide range of  
76 dynamics observed in the field. For example, transmission of mosquito-borne viral  
77 (arboviral) diseases such as dengue, chikungunya, and Zika occur along a spectrum from  
78 low levels of year-round endemic transmission [5] to large seasonal or interannual  
79 outbreaks [6]. We hypothesize that important features of these differing dynamics arise  
80 due to regional or seasonal differences in climate, where the magnitude and direction of  
81 the effects of climate on vector and disease dynamics differ [7–12].

82

83 Understanding the mechanisms that drive disease dynamics can help address two  
84 critically important research priorities for arboviruses like dengue, chikungunya, and  
85 Zika: assessing intervention strategies and projecting climate change impacts on disease  
86 dynamics. While phenomenological models often replicate arboviral disease dynamics  
87 remarkably well [13], mechanistic models that do not rely on local data for calibration  
88 and capture mosquito population dynamics and interactions between mosquitoes and  
89 humans will provide more realistic projections for epidemic dynamics across a broad  
90 range of transmission settings. With no widely available vaccine, vector control (e.g.,  
91 larvicides, *Wolbachia*-infected mosquito releases) remains the primary method for  
92 preventing arboviral disease transmission, and, like other vector-borne diseases with

93 complex transmission dynamics, model simulations can help guide effective intervention  
94 efforts [14,15]. Further, mechanistic models are better suited to predict how climate  
95 change will impact future disease burden and distribution, as projected climate conditions  
96 are outside the current arboviral climate niche space [16]. Despite the potential usefulness  
97 of mechanistic approaches, validation with vector and disease data are limited, raising an  
98 important question about which epidemic characteristics, if any, we should expect a  
99 model to capture when the model was parameterized with data that is on different scales  
100 (e.g., individuals versus populations) and independent from the transmission system we  
101 wish to predict. Thus, because we cannot study epidemic dynamics in every possible  
102 transmission setting, it becomes important to understand the extent to which models  
103 derived from fundamental and laboratory-measured traits explain disease dynamics  
104 across diverse settings.

105

106 We hypothesize that a climate-driven mechanistic model with limited calibration should  
107 capture many important characteristics of disease dynamics for dengue, chikungunya, and  
108 Zika because of the ecology of *Aedes aegypti*, the primary disease vector. *Ae. aegypti* are  
109 anthropophilic, globally distributed mosquitoes that breed in artificial containers with  
110 standing water [17,18]. All mosquito and parasite traits that are important for  
111 transmission and linked to metabolism, such as reproduction, development, survival,  
112 biting rate, and extrinsic incubation period, are temperature dependent with an  
113 intermediate thermal optimum [19–21]. Humidity is positively associated with mosquito  
114 survival because the high surface area to volume ratio of mosquitoes exposes them to  
115 desiccation [22,23]. Standing water from rainfall provides essential larval and pupal

116 habitat for mosquitoes, but the relationship is complex because heavy rainfall can flush  
117 away breeding habitats [24–26] and water storage practices during drought can increase  
118 water availability, mosquito abundance, and contact between mosquitoes and people [27–  
119 29]. A previous simulation study predicted that in settings with suitable climate for  
120 transmission throughout the year (e.g., mean temperature = 25°C; range = 20 – 30°C),  
121 temperature drives the timing and duration of outbreaks, but not the maximum number of  
122 infections or final epidemic size [30]. This finding suggests that a model that incorporates  
123 temperature-dependent vector traits should capture some important epidemic  
124 characteristics.

125

126 Arboviral dynamics differ considerably in South America and sub-Saharan Africa,  
127 potentially because of differences in climate and socio-ecological conditions. Previous  
128 studies have found that *Ae. aegypti* and dengue were positively associated with warm and  
129 wet conditions in South America and sub-Saharan Africa [6,36–38], although other *Ae.*  
130 *aegypti*-vectored arboviruses in Africa such as chikungunya have been associated with  
131 warm and dry conditions [39]. Countries on both continents have all four dengue  
132 serotypes circulating and have recently experienced outbreaks of chikungunya; yet,  
133 arboviral transmission dynamics differ in each region. In South America, dengue is a re-  
134 emerging disease with large seasonal epidemics that frequently result in severe dengue  
135 [6]; by contrast, in sub-Saharan Africa, dengue is transmitted at low levels year-round [5]  
136 and intermittent self-limiting outbreaks often go undetected [40]. Further, compared with  
137 South America, severe dengue is rare in sub-Saharan Africa, perhaps because African

138 strains of *Ae. aegypti* have lower susceptibility to all four dengue serotypes [41], and/or  
139 because people of African ancestry are less susceptible to severe dengue [42].

140

141 In this work, we test the extent to which climate-driven mosquito traits drive disease  
142 dynamics across two geographically distinct regions and characterize additional  
143 climatological, ecological, and social factors that may mediate the effects of climate on  
144 disease dynamics. We build on previous mechanistic and semi-mechanistic models that  
145 incorporate the *Aedes* mosquito life cycle and human disease dynamics [30–35] by  
146 combining a suite of temperature, humidity, and rainfall dependent trait functions into  
147 one epidemiological model. We validate the model with *Ae. aegypti* abundances and  
148 laboratory-confirmed dengue, chikungunya, and Zika cases from two equatorial countries  
149 with distinct socioeconomic, geographic, cultural, and disease transmission settings:  
150 Ecuador and Kenya. We find that a climate-driven model with limited calibration to local  
151 data captures three key epidemic characteristics across diverse settings: the number,  
152 timing, and duration of outbreaks. The model generates a range of vector and disease  
153 dynamics with varying levels of accuracy. Further, we find that the model predicted  
154 vector dynamics better in sites with a smaller proportion of young children in the  
155 population, lower mean temperature, and homes with piped water and made of cement.  
156 These results indicate that a climate-driven model with limited calibration can capture  
157 important epidemic characteristics, which can help guide intervention efforts and  
158 improve disease projections associated with climate change.

159

160

161 Results:

162 Study sites

163 We selected study sites within each country that are distributed across a gradient of  
164 temperature, humidity, and rainfall and are climatologically and socio-economically  
165 distinct (Fig. 1, Table 1). The climate gradient is driven by factors like elevation, distance  
166 to ocean, and land cover type, as all study sites are located at similar latitudes near the  
167 equator. Demographics, housing quality, and exposure, susceptibility, and adaptive  
168 capacity vary most strongly between the two regions, although there are some differences  
169 among sites within the same the country.

170

171

172 Table 1: Study sites differ geographically, climatologically, and socioeconomically.

173 <sup>1</sup>Mean annual normalized difference vegetation index (NDVI) is a proxy for  
174 photosynthesis and measured as a difference in spectral reflectance in the visible and  
175 near-infrared regions from NASA/NOAA MODIS (MOD13A1) [43]. <sup>2</sup>Dominant land  
176 cover type is measured and classified from spectral and temporal features from  
177 NASA/NOAA MODIS (MCD12Q1) [44]. Land cover types include (9) Tree cover 10 -  
178 30%, (10) Dominated by herbaceous annuals, (13) >30% impervious surface area, and  
179 (14) 40 - 60% mosaics of small-scale cultivation. Bed net use represents availability of  
180 and/or willingness to adopt intervention strategies for preventing infection rather than a  
181 direct adaptive response to preventing infection by day-biting *Ae. aegypti* mosquitoes.

182



|                                                 | Huauquilas,<br>Ecuador                                                                                               | Machala,<br>Ecuador | Portovelo,<br>Ecuador | Zaruma,<br>Ecuador | Chulaimbo,<br>Kenya                                                                                            | Kisumu,<br>Kenya | Msmabweni,<br>Kenya | Ukunda,<br>Kenya |
|-------------------------------------------------|----------------------------------------------------------------------------------------------------------------------|---------------------|-----------------------|--------------------|----------------------------------------------------------------------------------------------------------------|------------------|---------------------|------------------|
| Site characteristics                            |                                                                                                                      |                     |                       |                    |                                                                                                                |                  |                     |                  |
| Elevation (m)                                   | 15                                                                                                                   | 6                   | 645                   | 1,155              | 1,328                                                                                                          | 1,100            | 4                   | 8                |
| Location                                        | Coastal                                                                                                              | Coastal             | Inland                | Inland             | Inland                                                                                                         | Inland           | Coastal             | Coastal          |
| Mean annual NDVI <sup>1</sup>                   | 0.22                                                                                                                 | 0.12                | 0.61                  | 0.57               | 0.63                                                                                                           | 0.35             | 0.33                | 0.52             |
| Dominant land cover type <sup>2</sup>           | 13                                                                                                                   | 13                  | 9                     | 10                 | 14                                                                                                             | 13               | 13                  | 10               |
| Climate                                         |                                                                                                                      |                     |                       |                    |                                                                                                                |                  |                     |                  |
| Mean temperature (°C)                           | 26                                                                                                                   | 26                  | 25                    | 22                 | 24                                                                                                             | 26               | 28                  | 28               |
| Mean relative humidity (%)                      | 81                                                                                                                   | 84                  | 81                    | 86                 | 69                                                                                                             | 50               | 76                  | 78               |
| Mean annual rainfall (mm)                       | 317                                                                                                                  | 669                 | 500                   | 1115               | 1125                                                                                                           | 810              | 1048                | 922              |
| Demographics                                    |                                                                                                                      |                     |                       |                    |                                                                                                                |                  |                     |                  |
| Human population size                           | 57,366                                                                                                               | 279,887             | 13,673                | 25,615             | 7,304                                                                                                          | 491,893          | 15,371              | 80,193           |
| Population <5 years (%)                         | 10                                                                                                                   | 9                   | 9                     | 8                  | 12                                                                                                             | 12               | 13                  | 14               |
| Population of African ancestry (%)              | 5.1                                                                                                                  | 6.0                 | 3.3                   | 2.9                | 100.0                                                                                                          | 100.0            | 100.0               | 100.0            |
| Housing quality (% houses)                      |                                                                                                                      |                     |                       |                    |                                                                                                                |                  |                     |                  |
| Piped water inside home                         | 90                                                                                                                   | 91                  | 100                   | 96                 | 2                                                                                                              | 4                | 3                   | 11               |
| No screens on windows                           | 7                                                                                                                    | 60                  | 91                    | 99                 | 74                                                                                                             | 78               | 43                  | 21               |
| House materials (cement/mud/wood)               | 87/5/0                                                                                                               | 87/8/5              | 95/0/5                | 93/1/1             | 29/70/0                                                                                                        | 77/17/0          | 38/62/0             | 51/47/0          |
| Exposure, vulnerability, and adaptive capacity  |                                                                                                                      |                     |                       |                    |                                                                                                                |                  |                     |                  |
| Arboviruses present                             | dengue, chikungunya, Zika                                                                                            |                     |                       |                    | >200 documented including dengue, chikungunya, Yellow fever, Rift Valley fever, West Nile fever, O'nyong-nyong |                  |                     |                  |
| Insecticide use (% houses)                      | 19                                                                                                                   | 28                  | 46                    | 37                 | 0                                                                                                              | 0                | 11                  | 55               |
| Bednet use (% houses)                           | 77                                                                                                                   | 55                  | 15                    | 21                 | 93                                                                                                             | 92               | 0                   | 96               |
| Other vector control strategies used            | Ultra-low volume fumigation with malathion (organophosphate) and community mobilization to eliminate larval habitats |                     |                       |                    | Mosquito coils                                                                                                 |                  |                     |                  |
| Annual gross domestic product by country (2018) | \$177 billion USD                                                                                                    |                     |                       |                    | \$85.98 billion USD                                                                                            |                  |                     |                  |

183

184 Capturing key epidemic characteristics

185 The dynamic susceptible, exposed, infectious – susceptible, exposed, infectious, removed

186 (SEI-SEIR) compartmental model parameterized with temperature-, humidity-, and

187 rainfall-dependent mosquito life history traits (Fig. 2) reproduced three key

188 characteristics of epidemics: number of outbreaks, timing of outbreak peak, and duration

189 of outbreaks. We defined an outbreak as a continuous time period with peak cases  
190 exceeding the mean number of cases (predicted or observed) plus one standard deviation  
191 within a site. Across all sites, the number of outbreaks predicted by the model closely  
192 matched the number of outbreaks observed ( $R^2 = 0.79$ ,  $p < 0.01$ ; Fig. 3a). Supporting our  
193 *a priori* expectations based on a previous simulation study [30], we found that the  
194 climate-driven model predicted peak timing of outbreaks ( $R^2 = 0.71$ ,  $p < 0.01$ ; Fig. 3b)  
195 and outbreak duration ( $R^2 = 0.51$ ,  $p < 0.01$ ; Fig. 3c) well but did not predict the final  
196 outbreak size (Fig. 3d) or maximum number of infections (Fig. 3e) across sites. Overall,  
197 the model predicted four outbreaks that were not observed and did not predict five  
198 outbreaks that occurred. The model may miss an outbreak (i.e., false negatives) when, for  
199 example, suitable climate occurs but the pathogen is not introduced or the susceptible  
200 population is depleted from previous outbreaks.

201

202 Capturing spatio-temporal disease dynamics across sites

203 The SEI-SEIR model generated mosquito and disease dynamics that better reflected  
204 observed dynamics in some sites than others (Fig. 4, Table 2). Model-predicted mosquito  
205 abundances were significantly correlated with field-collected observations of mosquito  
206 abundances in all eight study sites, explaining 28 – 85% of site-level variation through  
207 time based on pairwise correlations with an adjusted p-value for time series data  
208 (following [45]). Based on surveys conducted across all vector life stages in Kenya (only  
209 adult mosquitoes were collected in the Ecuador surveys), the SEI-SEIR model explained  
210 variation in the abundance of adult mosquitoes (28 – 63%) better than pupae (25 – 32%),  
211 late instars (30 – 33%), early instars (20 – 36%), and eggs (33 – 55%), likely because the

212 model did not explicitly incorporate other mosquito life history stages. Model-predicted  
213 disease cases were significantly correlated with laboratory-confirmed arboviral incidence  
214 in seven of the eight study sites, explaining 44 – 88% of site-level variation through time  
215 (within sites with statistically significant pairwise correlations). We confirmed that the  
216 predicted dynamics were stable with sensitivity analyses to initial conditions (see  
217 Methods), as emerging diseases can display chaotic dynamics due to a high sensitivity to  
218 initial conditions. Overall, the model reproduced disease dynamics slightly better for sites  
219 in Ecuador compared with Kenya.

220

221

222

223

224

225

226

227

228

229

230

231

232

233

234 Table 2: Model predictions reflect a range of observed transmission dynamics when  
 235 incorporating different rainfall functions and time lags across sites. For each study site,  
 236 we calculated pairwise correlations between time series of field observations (*Ae. aegypti*  
 237 abundances or arboviral cases) and time series of model predictions for the SEI-SEIR  
 238 model with one of three rain functions for mosquito carrying capacity (Brière, Inverse, or  
 239 Quadratic) and six time lags (0-5 months). This table shows specifications for the model  
 240 (e.g., rain function and time lag) with the highest pairwise correlation value,  $r$ , for each  
 241 study site and observation type (vectors or human disease cases), as well as the statistical  
 242 significance of the correlation value (adjusted p-value for two-sided hypothesis test)  
 243 based on the Modified Chelton method [45] to account for temporal autocorrelation.

|                        | Vector<br>dynamics   |      |                     |                 | Human<br>disease<br>dynamics |      |                     |                 |
|------------------------|----------------------|------|---------------------|-----------------|------------------------------|------|---------------------|-----------------|
| Site                   | Rainfall<br>function | $r$  | Adjusted<br>p-value | Lag<br>(months) | Rainfall<br>function         | $r$  | Adjusted<br>p-value | Lag<br>(months) |
| Huaquillas,<br>Ecuador | Quadratic            | 0.63 | 0.01                | 1               | Inverse                      | 0.60 | 0.00                | 2               |
| Machala,<br>Ecuador    | Quadratic            | 0.63 | 0.01                | 0               | Brière                       | 0.64 | 0.00                | 4               |
| Portovelo,<br>Ecuador  | Brière               | 0.66 | 0.01                | 1               | Brière                       | 0.88 | 0.00                | 3               |
| Zaruma,<br>Ecuador     | Inverse              | 0.85 | 0.00                | 1               | Inverse                      | 0.33 | 0.12                | 0               |
| Chulaimbo,<br>Kenya    | Inverse              | 0.45 | 0.00                | 1               | Quadratic                    | 0.36 | 0.02                | 4               |
| Kisumu,<br>Kenya       | Brière               | 0.48 | 0.00                | 0               | Quadratic                    | 0.51 | 0.00                | 4               |
| Msambweni,<br>Kenya    | Inverse              | 0.28 | 0.04                | 0               | Inverse                      | 0.57 | 0.00                | 3               |
| Ukunda,<br>Kenya       | Inverse              | 0.37 | 0.03                | 1               | Inverse                      | 0.78 | 0.00                | 5               |

244

245 We found evidence that rainfall affects transmission through multiple mechanisms and at  
 246 different time lags (Table 2). Since the effect of rainfall on mosquito abundances is not

247 well understood, we simulated disease dynamics for each site three times, using one of  
248 three hypothesized rainfall relationships (Brière, inverse, and quadratic; Supplementary  
249 Fig. 3). We determined the best rainfall function and time lag for each site based on the  
250 highest pairwise correlation value between model predictions and observations. The  
251 model with the exponentially decreasing inverse rain function (Supplementary Fig. 3c),  
252 which indicates that mosquito abundances peak when there is no or low rainfall (likely as  
253 a result of water storage practices and/or unreliable water sources) described observed  
254 mosquito and disease dynamics most often, especially in the Kenya sites (Table 2), where  
255 household access to piped water is very low (Table 1). The left-skewed unimodal Brière  
256 rainfall function (Supplementary Fig. 3a), which indicates that mosquito abundances  
257 increase with increasing rainfall until some threshold where flushing occurs, described  
258 disease dynamics in some settings, particularly in the Ecuador sites. The symmetric  
259 unimodal quadratic rainfall function (Supplementary Fig. 3b), which indicates that  
260 mosquito abundances peak with intermediate amounts of rainfall and are reduced with  
261 low and high rainfall values, also described disease dynamics in some settings.  
262 Interestingly, we did not find a single rainfall function that consistently described  
263 dynamics for mosquitoes or arboviral cases across study sites, or for both mosquitoes and  
264 arboviral cases within individual study sites (Table 2). In contrast, we did find some  
265 consistency with time lags. The model best predicted mosquito abundances in the same  
266 month or one month in the future. In more than half of the sites, the model best predicted  
267 human disease cases three to four months in the future, and in almost all sites at least two  
268 months in the future (the exception is Zaruma, where very few arbovirus cases were  
269 reported during the study period and were likely due to importation rather than local

270 transmission). Given that multiple rainfall functions and time lags are supported by field  
271 data (even within the same study site), we propose a conceptual model that incorporates  
272 multiple pathways for rainfall to affect disease dynamics along a continuum of rainfall  
273 (Fig. 5), in contrast to distinct functional relationships for a given setting, which  
274 motivated the approach used in this study.

275

276 Factors that mediate disease dynamics predictability

277 The ability of the model to generate similar dynamics to those found in the field varied  
278 with demography, housing quality, and climate. Although the sample size is small (N = 8  
279 sites), we found that the SEI-SEIR model generally predicted vector dynamics better in  
280 sites with a smaller proportion of young children in the population ( $R^2 = 0.89$ ,  $p < 0.01$ ;  
281 Fig. 6a), lower mean temperature ( $R^2 = 0.63$ ,  $p < 0.05$ ; Fig. 6c), and a larger proportion of  
282 homes with piped water ( $R^2 = 0.76$ ,  $p < 0.01$ ; Fig. 6b) and made of cement ( $R^2 = 0.69$ ,  $p$   
283  $< 0.05$ ; Fig. 6d; list of all factors we assessed are provided in Table 1). Based on the  
284 range of mean temperatures at our study sites (22 – 28°C), our findings indicate that  
285 vector dynamics become less predictable as temperatures near the optimal temperature  
286 for transmission (derived in previous studies as 29°C) following the shape and slope in  
287 the  $R_0$  curve (Fig. 7). This complements phenomenological models that have found  
288 minimal effects of temperature near the empirically derived thermal optima (Fig. 7).  
289 None of the socio-economic factors that we examined in this study (Table 1) explained  
290 variability in the pairwise correlations for human disease cases among sites.

291

292

293 Discussion:

294 Directly observing the influence of climate on species interactions and population  
295 dynamics is often challenging because of interacting and nonlinear relationships. Here,  
296 we directly and quantitatively connect laboratory-based climate relationships to observed  
297 mosquito and disease dynamics in the field, supporting the mechanistic role of climate in  
298 these disease systems. The trait-based modeling approach captured several key epidemic  
299 characteristics and generated a range of disease dynamics along a spectrum of settings  
300 with low levels of transmission to seasonal outbreaks, helping to reconcile seemingly  
301 context dependent effects (i.e., opposite conclusions about the magnitude and direction of  
302 effects; Fig. 7) of climate on arboviral transmission dynamics from the literature [7–  
303 12,47].

304

305 The results of this study shed some light on the influence of climate in driving endemic  
306 versus epidemic dengue transmission. Although Ecuador typically experiences seasonal  
307 epidemics [6] and Kenya typically experiences low levels of year-round transmission [5],  
308 the sites within this study suggest that epidemic transmission is more common in settings  
309 with clear seasonality (e.g., coastal sites) whereas endemic transmission is more common  
310 in settings with more climate variability (e.g., inland sites), regardless of country. Coastal  
311 sites experienced more regular seasonal climate cycles, likely because oceans buffer  
312 climate variability, and this seasonality corresponded with seasonal epidemics. In  
313 contrast, the inland sites experienced more day-to-day climate variability, which resulted  
314 in more fluctuations in disease cases. As a result, the occurrence and persistence of  
315 suitable temperature, rainfall, and humidity conditions enabling outbreaks were less

316 regular in sites with more climate variability. The ability of the model to detect key  
317 epidemic characteristics across endemic and epidemic settings indicates that climate  
318 plays a major role in driving when outbreaks occur and how long they last.

319

320 Using field data on mosquitoes and disease cases from diverse settings and a model  
321 parameterized with data from other studies, we identified several key epidemic  
322 characteristics that we should (and should not) expect to capture in new settings. While  
323 we would never expect a perfect correlation between model predictions and observations,  
324 even if the model perfectly captured climate-host-vector dynamics because of the many  
325 additional factors that affect transmission in nature, our results indicate that a model with  
326 limited calibration can determine the number of outbreaks across settings remarkably  
327 well (Fig. 3a). This finding could be particularly useful for prioritizing surveillance or  
328 intervention activities across a range of a potential sites that would otherwise appear  
329 equal in their propensity for outbreaks (e.g., similar climate conditions). We also show  
330 that the model captures the peak timing of outbreaks (Fig. 3b) and outbreak duration (Fig.  
331 3c) but not the final outbreak size (Fig. 3d) or maximum number of infections (Fig. 3e),  
332 supporting the hypothesis that the magnitude of disease cases during an outbreak in  
333 settings with year-round climate suitability for disease transmission are invariant to  
334 temperature, as proposed by [30], likely because the magnitude of disease cases is  
335 probably more strongly driven by the availability of susceptible hosts.

336

337 Given that the model generally did not predict the magnitude of outbreaks, we asked how  
338 well the model reproduced vector and human disease dynamics (i.e., variation over time)



339 across sites and whether this relationship varied systematically with different socio-  
340 economic factors. Across sites, the range of temporal correlations between model  
341 predictions and observations ( $N = 8$ ; Fig. 4, Table 2) provides an informative metric for  
342 the proportion of true disease dynamics that we might expect to capture in new settings,  
343 ranging from 28 – 88%. The correlations varied with demography, housing construction,  
344 and climate (Fig. 6). The model may have better explained vector dynamics in locations  
345 with a lower proportion of children under five years old for a variety of reasons,  
346 including because bottom-heavy demographic pyramids are often associated with lower  
347 socioeconomic status and higher mobility throughout the day. In addition to the  
348 demographic makeup of sites, housing construction within sites also seems to modify  
349 transmission dynamics: vector dynamics were less predictable in sites with more houses  
350 with piped water and made of cement (Fig. 6b,d). These results suggest that piped water  
351 may prevent additional contact between humans and mosquitoes associated with stored  
352 water around the home. In addition, housing materials like cement that lower indoor  
353 temperature could artificially decrease climate suitability for mosquitoes, thereby  
354 decreasing the probability that mosquitoes will enter and bite people inside their homes.  
355 Despite incorporating all known temperature-dependent mosquito traits into the SEI-  
356 SEIR model, we still found vector dynamics became less predictable near the empirically  
357 derived thermal optima for arboviral transmission (Figs. 6c, 7). This finding may be  
358 associated with physiological or behavioral responses of mosquitoes to temperatures near  
359 their thermal safety margin [59,60] and/or humans modifying their environment (as  
360 described above) in locations optimal for transmission.  
361

362 Across the study sites, we found support for three hypothesized relationships between  
363 rainfall and mosquito carrying capacity as well as several time lags between model  
364 predictions and disease observations. Support for multiple rainfall functions could  
365 indicate that the effects of rainfall on immature habitat is highly heterogenous, which has  
366 been found in previous research in Ecuador [27] and Kenya [61]. Alternatively, the  
367 combination of multiple rainfall relationships and time lags could arise from nonlinear  
368 and delayed effects of extreme climate such as droughts and floods. More specifically,  
369 we hypothesize that there may be multiple mechanistic relationships for the effects of  
370 rainfall on mosquito abundance and arboviral disease dynamics (Fig. 5), and they may act  
371 on different time scales. For example, previous research indicated that dengue outbreaks  
372 were more likely to occur four to five months after a drought and one month after  
373 excessive rainfall and a statistical model that incorporated these dual exposure-lag-  
374 response functions was highly effective at predicting dengue outbreaks in Barbados [62].  
375 Further, if multiple rainfall relationships act in concert across varying time lags, this  
376 would help to explain why many different time lags have been observed between rainfall  
377 and arboviral dynamics in previous studies [6,27,51,63–65].

378

379 Future research can build on this study to improve our understanding of arboviral  
380 dynamics across settings. There were several factors that we did not include in this study,  
381 such as existing vector control programs, infrastructure, and preexisting immunity in the  
382 population. For instance, in Ecuador, factors such as distance to abandoned properties,  
383 interruptions in access to piped water, shaded patios, and use of vector control are  
384 documented to influence arbovirus transmission [66], whereas in the study sites in Kenya,

385 factors associated with arboviral transmission are less well studied and there are currently  
386 no widely used vector control or local arboviral surveillance programs employed. Future  
387 studies could further improve the model by incorporating human immune dynamics  
388 associated with interactions among different dengue serotypes [67] or cross-reactivity  
389 among viral antibodies [68], differential susceptibility across human age classes [69], and  
390 heterogeneity in contact rates between mosquitoes and people based on human behavior  
391 and movement [70,71]. Further, as experimental data becomes available for trait  
392 estimates specific to chikungunya and Zika, this model could be partitioned to model  
393 each arboviral disease individually. This is likely to be an important addition as the  
394 different arboviruses tend to peak in different years, possibility due to differences in viral  
395 development rates and extrinsic incubation periods among arboviruses. Therefore,  
396 validating the model with all three arboviruses combined may oversimplify the complex  
397 interannual dynamics that arise due to competition among arboviruses in mosquitoes and  
398 humans. There were not enough data for chikungunya and Zika cases in this study to  
399 formally test such patterns. This study provides strong evidence that a trait-based model,  
400 parameterized independently from field data, can reproduce key epidemic characteristics  
401 and a range of spatiotemporal arboviral disease dynamics. Such mechanistic, climate-  
402 driven models will become increasingly important to support public health efforts in the  
403 face of novel climate regimes emerging due to climate change.

404

405

406

407

408 Methods:

409 Climate data

410 We collected *in situ* measurements of daily mean temperature, relative humidity, and  
411 rainfall at each study site and interpolated missing data where necessary. We used  
412 temperature and humidity measurements from HOBO loggers and rainfall measurements  
413 from rain gauges for sites in Kenya. We used temperature, humidity, and rainfall  
414 measurements from automatic weather stations operated by the National Institute of  
415 Meteorology and Hydrology in Ecuador. For Kenya, we interpolated missing temperature  
416 data from NOAA Global Surface Summary of the Day (Supplementary Table 2,  
417 Supplementary Fig. 4) and interpolated missing rainfall data from NOAA Climate  
418 Prediction Center Africa Rainfall Climatology dataset (Supplementary Table 2,  
419 Supplementary Fig. 5). For Ecuador, we interpolated missing temperature  
420 (Supplementary Table 2, Supplementary Fig. 4) and rainfall (Supplementary Table 2,  
421 Supplementary Fig. 5) data using the nearest study site where possible and otherwise  
422 based on long term mean values for the corresponding Julian day. To interpolate missing  
423 data, we linearly regressed all measurements taken on the same day in two datasets and  
424 then used the linear model to interpolate temperature for the site with missing data based  
425 on the climate measurement from the secondary source for the date when the data was  
426 missing (Supplementary Figs. 4-5). For rainfall, we first calculated a moving window of  
427 14-day accumulated rainfall (which is short enough to capture variability and seasonality  
428 in rainfall patterns and follows [72]) for each day before interpolation because modeled  
429 daily rainfall values are less reliable than accumulated rainfall over a two week period.  
430 We interpolated 14-day cumulative rainfall for any day with a missing rainfall value in

431 the prior 14 days. For both Kenya and Ecuador, we interpolated missing relative humidity  
432 data based on long term mean values for the corresponding Julian day (Supplementary  
433 Table 2). We then calculated the saturation vapor pressure deficit (SVPD) from  
434 temperature and humidity to use in the humidity function because previous research  
435 suggests SVPD is a more informative measure of the effect of humidity on mosquito  
436 survival compared with relative humidity [73]. To calculate SVPD, we first calculated the  
437 saturation vapor pressure as:

$$SVP = 610.7 * 10^{7.5 * T / (273.3 + T)} \quad (1)$$

438 where ( $T$ ) is temperature in degrees Celsius. We then calculated SVPD (in kilopascals) as

$$SVPD = 1 - \frac{RH}{100} * SVP \quad (2)$$

439 where RH is relative humidity. The final dataset had no missing values for temperature  
440 (Supplementary Fig. 6), rainfall (Supplementary Fig. 7), and humidity (Supplementary  
441 Fig. 8).

442

443 Vector surveys

444 We collected, counted, sexed, and classified mosquitoes by species, and aggregated the  
445 data to mean number of *Aedes aegypti* per house, month, year, and site to account for  
446 differences in survey effort across months and sites. We collected adult mosquitoes using  
447 Prokopack aspirators [74]. In Ecuador, we collected mosquitoes from approximately 27  
448 houses per site (range = 3-57 houses across four sites) every one-to-two weeks during  
449 three, four-month sampling periods between July 2016 and August 2018 ( $\approx 37$  sampling  
450 weeks per site) to capture different parts of the transmission season. We aggregated the  
451 Ecuador vector data to monthly values ( $\approx 15$  sampling months per site) to correspond

452 with the temporal resolution of surveys in Kenya. In Kenya, we collected mosquitoes  
453 from approximately 20 houses per site (range = 1-47 houses across four sites) every  
454 month between January 2014 and October 2018 ( $\approx$  54 sampling months per site). In  
455 Kenya, we also collected pupae, late instars, and early instars from containers with  
456 standing water around the home and collected eggs by setting ovitraps for an average of  
457 four days in and around each house monthly. We brought pupae, late and early instars,  
458 and eggs to the insectary and reared them to adulthood to classify individuals by sex and  
459 species. All mosquito traps capture a small portion of the true mosquito population;  
460 therefore, using consistent trapping methods at the same locations through time allows us  
461 to compare relative mosquito population dynamics across study sites rather than the  
462 absolute magnitude of mosquito abundances.

463

464 Arboviral surveys

465 For Ecuador, we analyzed laboratory-confirmed dengue, chikungunya, and Zika cases  
466 provided by the Ministry of Health (MoH) of Ecuador. The MoH collects serum samples  
467 from a subset of people with suspected arbovirus infections, and samples are tested at the  
468 National Public Health Research Institute by molecular diagnostics (RT-PCR) or  
469 antibody tests (IgM ELISA for dengue), depending on the number of days of illness.  
470 Results are sent to the MoH Epidemiological Surveillance and Control National  
471 Directorate (SIVE Alerta system). Laboratory-confirmed dengue cases were available for  
472 all four sites from 2014 to 2018. Laboratory-confirmed chikungunya cases were available  
473 for Machala and Huaquillas from 2015 to 2018. Laboratory-confirmed Zika cases were  
474 available for Machala from 2016 to 2018.

475

476 For Kenya, we used laboratory-confirmed dengue cases aggregated by site and month  
477 between 2014 and 2018 collected in a passive surveillance study on childhood febrile  
478 illness in Kenya (NIH R01AI102918, PI: ADL). The study population consisted of 7,653  
479 children less than 18 years of age with undifferentiated febrile illness. Children with fever  
480 enrolled in the study when attending outpatient care in one of the four study sites (Mbaka  
481 Oromo Health Centre in Chulaimbo, Obama Children's Hospital in Kisumu, Msambweni  
482 District Hospital in Msambweni, and Ukunda/Diani Health Center in Ukunda). Local  
483 health officers collected comprehensive clinical and demographic data and phlebotomy at  
484 the initial visit. We tested each child's blood for dengue viremia by molecular diagnostics  
485 (conventional PCR [75] or targeted multiplexed real-time PCR when available [76]), or  
486 serologic conversion between an initial and a follow up visit (IgG ELISA [77]).

487

488 For arboviral data collection in Ecuador and Kenya, participants provided consent and all  
489 local and institutional protocols were followed (Stanford IRB #31488, KEMRI ERC  
490 #2611).

491

492 SEI-SEIR model

493 We adapted an SEI-SEIR model parameterized for dengue transmission in *Ae. aegypti*  
494 mosquitoes [30] to simulate mosquito abundance and arboviral cases through time based  
495 on daily weather conditions in eight study locations. The model (equations 3-9; Fig. 2),  
496 created independently from the observed data described above, allows mosquito life  
497 history traits and viral development rate to vary with temperature ( $\tau$ ) following [30],

498 mosquito carrying capacity to vary with accumulated 14-day rainfall ( $R$ ) following [72],  
 499 and mosquito mortality to vary with humidity (i.e., saturation vapor pressure deficit) ( $H$ )  
 500 following [73].

501

$$\frac{dS_m}{dt} = \varphi(T, H) * \frac{1}{\mu(T, H)} * N_m * \left(1 - \frac{N_m}{K(T, R, H)}\right) - \left(a(T) * pMI(T) * \frac{I_h}{N_h} + \mu(T, H)\right) * S_m \quad (3)$$

$$\frac{dE_m}{dt} = a(T) * pMI(T) * \frac{I_h}{N_h} * S_m - (PDR(T) + \mu(T, H)) * E_m \quad (4)$$

$$\frac{dI_m}{dt} = PDR(T) * E_m - \mu(T, H) * I_m \quad (5)$$

$$\frac{dS_h}{dt} = -a(T) * b(T) * \frac{I_m}{N_h} * S_h + BR * S_h - DR * S_h + ie * N_h - ie * S_h \quad (6)$$

$$\frac{dE_h}{dt} = a(T) * b(T) * \frac{I_m}{N_h} * S_h - \delta * E_h - DR * E_h - ie * E_h \quad (7)$$

$$\frac{dI_h}{dt} = \delta * E_h - \eta * I_h - DR * I_h - ie * I_h \quad (8)$$

$$\frac{dR_h}{dt} = \eta * I_h - DR * R_h - ie * R_h \quad (9)$$

502

503 where

$$\varphi(T, H) = EFD(T) * pEA(T) * MDR(T) \quad (10)$$

504 The adult mosquito population ( $N_m$ ) is separated into susceptible ( $S_m$ ), exposed ( $E_m$ ), and  
 505 infectious ( $I_m$ ) compartments and the human population ( $N_h$ ) is separated into susceptible  
 506 ( $S_h$ ), exposed ( $E_h$ ), infectious ( $I_h$ ), and recovered ( $R_h$ ) compartments (Fig. 2). Climate-  
 507 independent model parameters include the intrinsic incubation period ( $\delta = 5.9$  days),  
 508 human infectivity period ( $\eta = 5$  days), birth rate ( $BR = 31.782$  and  $20.175$  per 1000 people  
 509 in Ecuador and Kenya respectively), death rate ( $DR = 5.284$  and  $5.121$  per 1000 people for  
 510 Ecuador and Kenya respectively), and immigration/emigration rate ( $ie = 0.01$ ). The  
 511 temperature-dependent SEI-SEIR model was developed by Huber et al. [30] and allows  
 512 mosquito life history traits and viral development rate to vary according to thermal



513 response curves fit from data derived in laboratory experiments conducted at constant  
514 temperatures (Table 3). Although laboratory experiments do not reflect real-world  
515 conditions, the physiological responses measured are biologically meaningful. The  
516 temperature-dependent traits include eggs laid per female per day ( $EFD$ ), the probability of  
517 egg-to-adult survival ( $pEA$ ), mosquito development rate ( $MDR$ ), mosquito mortality rate  
518 (lifespan<sup>-1</sup>;  $\mu$ ), biting rate ( $a$ ), probability of mosquito infection per bite on an infectious  
519 host ( $pMI$ ), parasite development rate ( $PDR$ ), and probability of mosquito infectiousness  
520 given an infectious bite ( $b$ ). We modified the mosquito mortality rate equation to vary as  
521 a function of temperature and humidity by fitting a spline model based on a pooled  
522 survival analysis of *Ae. aegypti* [73] (Supplementary Fig. 9):

$$\mu(T, H) = \frac{1}{c * (T - T_0) * (T - T_m)} + (1 - (0.01 + 2.01 * H)) * y \quad H < 1 \quad (11)$$

$$\mu(T, H) = \frac{1}{c * (T - T_0) * (T - T_m)} + (1 - (1.22 + 0.27 * H)) * y \quad H \geq 1 \quad (12)$$

523 where the rate constant ( $c$ ), minimum temperature ( $T_0$ ), and maximum temperature ( $T_m$ )  
524 equal -1.24, 16.63, and 31.85 respectively (Table 3), humidity ( $H$ ) is the saturation vapor  
525 pressure deficit, and  $y$  is a scaling factor that we set to 0.005 and 0.01, respectively, to  
526 restrict mosquito mortality rates within the range of mortality rates estimated by other  
527 studies [19,73]. The linear humidity function has a steeper slope at lower humidity values  
528 (equation 11) compared with higher humidity values (equation 12) based on previous  
529 research [73] (Supplementary Fig. 9).

530

531 We modeled adult mosquito carrying capacity,  $K$ , as a modified Arrhenius equation  
532 following [30,78]:

$$K(T, H, R) = \frac{EFD(T_0) * pEA(T_0) * MDR(T_0) * \mu(T_0, H_0)^{-1} - \mu(T_0, H_0)}{EFD(T_0) * pEA(T_0) * MDR(T_0) * \mu(T_0, H_0)^{-1}} * N_{m.max} \quad (13)$$

$$* e^{\frac{-E_A * (T - T_0)^2}{\kappa_B * (T + 273) * (T_0 + 273)}} * f(R)$$

533 with  $T_0$  and  $H_0$  set to the temperature and humidity where carrying capacity is greatest (i.e.,  
 534 physiological optimal conditions from laboratory experiments; 29°C and 6 kPA),  $N_{m.max}$   
 535 set to the maximum possible mosquito abundance in a population (twice the human  
 536 population size following [30]), and the Boltzmann constant, ( $\kappa_B$ ), is  $8.617 \times 10^{-5}$  eV/K.  
 537 We set the activation energy,  $E_A$ , as 0.05 based on [30]. Since there were no experimental  
 538 data from which to derive the functional response of mosquito carrying capacity across a  
 539 gradient of rainfall values, we tested several functional relationships based on  
 540 hypothesized biological relationships between freshwater availability and immature  
 541 mosquito breeding habitat, modeling the effect of rainfall on carrying capacity,  $f(R)$ , as  
 542 either:

$$f(R_{Brière}) = c * R * (R - R_{min}) * \sqrt{(R_{max} - R)} * z \quad (14)$$

$$f(R_{Quadratic}) = c * (R - R_{min}) * (R - R_{max}) * z \quad (15)$$

$$f(R_{Inverse}) = \frac{1}{R} * z \quad (16)$$

543 where minimum rainfall ( $R_{min}$ ) equaled 1 mm and maximum rainfall ( $R_{max}$ ) equaled 123  
 544 mm based on the high probability of flushing [26]. The quadratic function is similar to  
 545 the rainfall function found in [26] and the inverse function is based on the rainfall  
 546 function used in [72]. We used rate constants ( $c$ ) of  $7.86e^{-5}$  and  $-5.99e^{-3}$  for the Brière and  
 547 quadratic functions respectively, based on rate constants for other parameters with similar  
 548 functional forms (Table 3). We also included a scaling factor,  $z$  (0.28, 0.025, and 0.60  
 549 respectively), to restrict the maximum carrying capacity to produce model outputs based

550 on a subsample of the total population for comparison with observations. Since the rate  
 551 constant,  $c$ , is multiplied by  $z$ , inferring the exact value of  $c$  is not necessary because it is  
 552 scaled by  $z$ . The scaling factor could be removed from the model to simulate dynamics in  
 553 the total population.

554

555 Table 3: Fitted thermal responses for *Ae. aegypti* life history traits. Traits were fit to a  
 556 Brière [ $cT(T - T_0)(T_m - T)^{\frac{1}{2}}$ ] or a quadratic [ $c(T - T_m)(T - T_0)$ ] function where  $T$   
 557 represents temperature.  $T_0$  and  $T_m$  are the critical thermal minimum and maximum,  
 558 respectively, and  $c$  is the rate constant. Thermal responses were fit by [19] and also used  
 559 in [30]. Parasite development rate was measured as the virus extrinsic incubation rate.

| Trait | Definition                                                  | Function  | $c$                     | $T_0$ | $T_m$ |
|-------|-------------------------------------------------------------|-----------|-------------------------|-------|-------|
| $a$   | Biting rate (day <sup>-1</sup> )                            | Brière    | $2.71 \times 10^{-04}$  | 14.67 | 41.00 |
| $EFD$ | Eggs laid per female per day                                | Brière    | $2.08 \times 10^{-02}$  | 14.06 | 32.03 |
| $pEA$ | Probability of mosquito egg-to-adult survival               | Quadratic | $-3.36 \times 10^{-03}$ | 7.68  | 38.31 |
| $MDR$ | Mosquito egg-to-adult development rate (day <sup>-1</sup> ) | Brière    | $1.49 \times 10^{-04}$  | 15.12 | 37.67 |
| $Lf$  | Adult mosquito lifespan (days)                              | Quadratic | -1.24                   | 16.63 | 31.85 |
| $b$   | Probability of mosquito infectiousness                      | Brière    | $9.86 \times 10^{-04}$  | 12.05 | 32.79 |
| $pMI$ | Probability of mosquito infection                           | Brière    | $5.23 \times 10^{-04}$  | 1.51  | 34.74 |
| $PDR$ | Parasite development rate (day <sup>-1</sup> )              | Brière    | $1.04 \times 10^{-04}$  | 11.50 | 38.97 |

560

561 To initiate the model, we used site-specific values for human population size and  
 562 randomly selected one set of values for all sites for the proportion of mosquitoes and  
 563 humans in each compartment. For Ecuador, we used population estimates from official

564 population projections produced by Proyección de la Población Ecuatoriana, por años  
565 calendario, según cantones 2010-2020  
566 (<https://www.ecuadorencifras.gob.ec/proyecciones-poblacionales/>) with population sizes  
567 of 57,366, 279,887, 13,673, and 25,615 for Huaquillas, Machala, Portovelo, and Zaruma,  
568 respectively, based on 2017 projections. For Kenya, we estimated the population sizes  
569 served by each outpatient care facility by creating a polygon around all the geolocations  
570 of study participants' homes enrolled at each outpatient care facility and summed  
571 population count data from NASA's Socioeconomic Data and Applications Center  
572 Gridded Population of the World v4 (<https://doi.org/10.7927/H4JW8BX5>) within each  
573 polygon using ArcGIS v 10.4.1. We estimated population sizes of 7,304, 547,557,  
574 240,698, and 154,048 for Chulaimbo, Kisumu, Msambweni, and Ukunda, respectively.  
575 We set the ratio of mosquitoes to humans to two, following [30]. We used the following  
576 values as the initial proportion of mosquitoes and humans in each model compartment:  
577  $S_m = 0.22$ ,  $E_m = 0.29$ ,  $I_m = 0.49$ ,  $S_h = 0.58$ ,  $E_h = 0.22$ ,  $I_h = 0.00$ , and  $R_h = 0.20$ . We  
578 determined that the model was invariant to initial proportion values after a short burn-in  
579 period (90 days) based on a sensitivity analysis (Supplementary Fig. 10); therefore, we  
580 randomly selected one set of initial proportion values from the sensitivity analysis for all  
581 the model simulations. We also determined that the temporal trajectories of model  
582 dynamics did not change when we varied the critical thermal minimum, maximum, and  
583 rate constants (Table 3) for *Aedes aegypti* life history traits (Supplementary Figs. 1-2).  
584  
585 We ran all model simulations using the deSolve package in R statistical software v 3.5.3  
586 [79].

587

588 Model validation

589 To validate the SEI-SEIR model, we calculated pairwise correlations with an adjusted p-  
590 value to account for autocorrelation for each site. For the pairwise correlations, we used  
591 the ccf function in base R [79] to calculate correlations between the two times series of  
592 model predictions and observations with 0, 1, 2, 3, 4, and 5-month lags. We then  
593 calculated an adjusted p-value using the Modified Chelton method [45] to adjust the null  
594 hypothesis test of sample correlation between autocorrelated time series. To assess  
595 predictions and observations for vector dynamics for each site, we compared monthly  
596 time series of the total predicted mosquito population from the SEI-SEIR model with the  
597 monthly time series of mean number of *Aedes aegypti* (per house). We followed the same  
598 procedure to compare model predictions with other mosquito life stages for sites in  
599 Kenya. Similarly, to compare predictions and observations for human disease dynamics  
600 for each site, we compared monthly times series of predicted infected individuals from  
601 the SEI-SEIR model with the monthly time series of total laboratory-confirmed arboviral  
602 cases. For subsequent analyses, we used model predictions from the model (e.g., SEI-  
603 SEIR model with a specific rainfall function and time lag) with the highest pairwise  
604 correlation value.

605

606 To compare key epidemic characteristics between model predictions and observations  
607 and to compare site-specific correlations with socio-economic factors, we used linear  
608 regression models using the lm function in that stats package in R [79]. We defined  
609 outbreaks as a continuous time period where the peak cases exceeded the mean number

610 of cases (predicted or observed) plus one standard deviation within a site. We then used  
611 those outbreak periods to count the total number of outbreaks within each site, and, for  
612 predicted and observed outbreaks that overlapped in time, the duration, peak timing total  
613 outbreak size, and maximum number of infections. We compared predictions and  
614 observations for each of these metrics with linear regression. Since we were interested in  
615 whether model predictions matched observations for each independent outbreak period,  
616 we did not allow varying intercepts or slopes by site. Similarly, we compared the  
617 pairwise correlation values (described above) across all sites with each socio-economic  
618 factor listed in Table 1 separately using linear regressions.

619

#### 620 Comparison of $R_0$ with prior studies

621 We collected effect sizes of temperature on dengue incidence from 12 peer-reviewed  
622 studies from the literature (Supplementary Table 1). We selected studies with mean  
623 temperatures across the predicted temperature range where arboviral transmission can  
624 occur. We scaled the coefficient values to visualize the relative effect of temperature  
625 across studies given that the original analyses were conducted with different temperature  
626 metrics and across different temperature ranges. We provide additional information and  
627 sources in Supplementary Table 1.

628

#### 629 Data Availability statement

630 All data that support the findings of this study are deposited in a public repository, with  
631 the exception of arboviral incidence data from Ecuador, which is available from the  
632 corresponding author upon reasonable request. Climate, epidemic characteristics, socio-

633 economic, vector, and Kenya arboviral incidence data that we analyzed in this study are  
634 available in the following public repository: [https://github.com/jms5151/SEI-](https://github.com/jms5151/SEI-SEIR_Arboviruses)  
635 [SEIR\\_Arboviruses](https://github.com/jms5151/SEI-SEIR_Arboviruses). This data supported Figures 3, 4, and 6 in the main text and  
636 Supplemental Figures 1-3 and 6-10. Data that supports Figure 7 is available in  
637 Supplemental Table 1. The arboviral case data from Ecuador are available from the  
638 corresponding author upon reasonable request. The data are not publicly available due to  
639 a Confidentiality Agreement with the Ecuador Ministry of Health. Crude birth and death  
640 rates used in the model are from The World Bank Open Data. The URL for crude birth  
641 rate in Ecuador is  
642 <https://data.worldbank.org/indicator/SP.DYN.CBRT.IN?locations=EC> and for Kenya is  
643 <https://data.worldbank.org/indicator/SP.DYN.CBRT.IN?locations=KE>. The URL for  
644 crude death rate for Ecuador is  
645 <https://data.worldbank.org/indicator/SP.DYN.CDRT.IN?locations=EC> and for Kenya is  
646 <https://data.worldbank.org/indicator/SP.DYN.CDRT.IN?locations=KE>.

647

648 Code availability

649 Model and analysis codes are available at [https://github.com/jms5151/SEI-](https://github.com/jms5151/SEI-SEIR_Arboviruses)

650 [SEIR\\_Arboviruses](https://github.com/jms5151/SEI-SEIR_Arboviruses).

651

652 Acknowledgements

653 JMC, ADL, EFL, and EAM were supported by a Stanford Woods Institute for the

654 Environment – Environmental Ventures Program grant (PIs: EAM, ADL, and EFL).

655 EAM was also supported by a Hellman Faculty Fellowship and a Terman Award. ADL,

656 BAN, FMM, ENGS, MSS, ARK, RD, AA, and HNN were supported by a National  
657 Institutes of Health R01 grant (AI102918; PI: ADL). EAM, AMSI, and SJR were  
658 supported by a National Science Foundation (NSF) Ecology and Evolution of Infectious  
659 Diseases (EEID) grant (DEB-1518681) and AMSI and SJR were also supported by an  
660 NSF DEB RAPID grant (1641145). EAM was also supported by a National Institute of  
661 General Medical Sciences Maximizing Investigators' Research Award grant  
662 (R35GM133439) and an NSF and Fogarty International Center EEID grant (DEB-  
663 2011147). We thank Cat Lippi for assistance with formatting household quality survey  
664 data from Ecuador.

665

666 Author contributions

667 EAM, ADL, EFL, and JMC conceived of project. JMC conducted analyses and wrote  
668 manuscript. EAM, ADL, EFL, and AMSI secured funding for the project. BNN, FMM,  
669 EBA, AA, MJBC, RD, FHH, RM, and HNN collected data. ENGS and MMS conducted  
670 laboratory analyses. ARK, SJR, and RS processed data. All authors revised and approved  
671 of the manuscript.

672

673 Competing Interests

674 The authors declare no competing interests.

675

676 Figure 1: Study sites within two equatorial countries: (a) Ecuador in South America and  
677 (b) Kenya in East Africa. We created this map in R using Google Maps as the base layer.

678



679 Figure 2: SEI-SEIR epidemiological model framework. The mosquito population is split  
680 among susceptible ( $S_m$ ), exposed ( $E_m$ ), and infectious ( $I_m$ ) compartments (squares) and  
681 the human population is split among susceptible ( $S_h$ ), exposed ( $E_h$ ), infectious ( $I_h$ ), and  
682 recovered ( $R_h$ ) compartments. Solid arrows indicate the direction individuals can move  
683 between classes and dashed arrows indicate the direction of transmission. Transitions  
684 among compartments are labeled by the appropriate processes and corresponding rate  
685 parameters (see Methods for parameter definitions and more detail). Rate parameters with  
686 a T, H, and R are temperature-, humidity-, and rainfall-dependent, respectively. The total  
687 adult mosquito population ( $S_m$ ,  $E_m$ , and  $I_m$  compartments; dotted rectangle) is maintained  
688 at an abundance less than or equal to the mosquito carrying capacity.

689

690 Figure 3: Model predictions for the number, timing, and duration of arboviral outbreaks  
691 closely matched field observations. Scatterplots show model predictions versus  
692 observations for different epidemic characteristics. (a) Number of outbreaks indicates the  
693 total number of predicted and observed outbreaks in a site over the study period. (b)  
694 Timing of outbreak peak, (c) outbreak duration, (d) outbreak size, and (e) maximum  
695 infections (e.g.,  $\max I_h$  during an outbreak) correspond to individual outbreaks where  
696 model predictions and observations overlapped in time, therefore, some plots show  
697 multiple data points per site. Outbreaks are colored by site with different symbols for  
698 Ecuador (circles) and Kenya (triangles). We show regression lines and associated  
699 statistics ( $R^2$  = coefficient of determination; p-value = probability of two-sided  
700 hypothesis test) for statistically significant relationships. For visualization purposes, we  
701 jittered the data points to show overlapping data and we excluded data from Machala in

702 plots (d) outbreak size and (e) maximum infections because the magnitude differed  
703 substantially from all other sites.

704

705 Figure 4: Model predicts vector and human disease dynamics better in some settings than  
706 others. Each plot shows the time series of SEI-SEIR model predictions (grey dots  
707 connected by grey lines) and field observations (black dots connected by black lines) for  
708 vector (top two rows) and human disease (bottom two rows) dynamics for each study site  
709 with the pairwise correlation ( $r$ ) and adjusted  $p$ -value for two-sided hypothesis test ( $p$ ).

710 We calculated observed mosquito abundances as the mean number of adult *Ae. aegypti*  
711 per house, month, year, and site. We calculated observed arboviral cases as the total  
712 number of laboratory-confirmed dengue (any serotype), chikungunya, and Zika cases per  
713 month, year, and site; six of the eight study sites only included dengue cases (see  
714 Methods). The first and third rows show sites in Ecuador and the second and fourth rows  
715 show sites in Kenya. We show uncertainty in model predictions in Supplementary Figs.  
716 1-2.

717

718 Figure 5: Conceptual model for nonlinear functional relationships between rainfall and  
719 vector abundance and arboviral outbreak risk. Dashed lines show multiple potential  
720 pathways for rainfall to affect transmission dynamics and include the functional  
721 relationships supported in this study. Labels indicate the hypothesized mechanisms along  
722 a gradient of rainfall. Adapted from the following source: [46].

723

724 Figure 6: Demography, housing construction, and climate affect model predictive  
725 capacity for vectors. Factors that influence the predictability of vector dynamics include  
726 (a) proportion of the population under five years of age, (b) proportion of houses with  
727 piped water, (c) mean temperature, and (d) proportion of houses made with cement (walls  
728 and/or floors). Points indicate the pairwise correlation value for a single site (colors) with  
729 different symbols for Ecuador (circles) and Kenya (triangles). Each plot also shows the  
730 linear regression lines and associated statistics ( $R^2$  = coefficient of determination; p-value  
731 = probability of two-sided hypothesis test).

732

733 Figure 7: Independently predicted relative  $R_0$  from a model derived from laboratory  
734 studies explains differences in the magnitude and direction of the effects of temperature  
735 on dengue transmission in the field across varied settings from previous studies. The  
736 black line shows the relative basic reproductive number ( $R_0$ , normalized to a 0-1 scale)  
737 plotted against temperature based on all temperature-dependent traits from [19] used in  
738 the SEI-SEIR model presented here. Points indicate mean temperature values from  
739 previous field-based statistical analyses that related dengue cases with minimum,  
740 maximum, or mean ambient temperature; arrows correspond to the direction (up =  
741 positive, down = negative) and relative effect size of the temperature – dengue  
742 relationship based on coefficient values from the following studies: [47,48,57,58,49–56].  
743 See Methods and Supplementary Table 1 for more detail. As expected, the largest  
744 observed positive effects of temperature occurred in the rapidly increasing portion of the  
745  $R_0$  curve (~22-25°C; consistent with findings in this study) and the largest observed

746 negative effects occurred well above the predicted optimum, near the upper thermal limit  
747 (~33-35°C).

748

749

## 750 References

- 751 1. Ockendon N, Baker DJ, Carr JA, White EC, Almond REA, Amano T, et al.  
752 Mechanisms underpinning climatic impacts on natural populations: altered species  
753 interactions are more important than direct effects. *Glob Chang Biol.* 2014;20:  
754 2221–2229. doi:10.1111/gcb.12559
- 755 2. Boggs CL, Inouye DW. A single climate driver has direct and indirect effects on  
756 insect population dynamics. *Ecol Lett.* 2012;15: 502–508. doi:10.1111/j.1461-  
757 0248.2012.01766.x
- 758 3. Burkett VR, Wilcox DA, Stottlemeyer R, Barrow W, Fagre D, Baron J, et al.  
759 Nonlinear dynamics in ecosystem response to climatic change: Case studies and  
760 policy implications. *Ecol Complex.* 2005;2: 357–394.  
761 doi:10.1016/j.ecocom.2005.04.010
- 762 4. Molnár PK, Sckrabulis JP, Altman KA, Raffel TR. Thermal Performance Curves  
763 and the Metabolic Theory of Ecology—A Practical Guide to Models and  
764 Experiments for Parasitologists. *J Parasitol.* 2017;103. doi:10.1645/16-148
- 765 5. Hortion J, Mutuku FM, Eyherabide AL, Vu DM, Boothroyd DB, Grossi-Soyster  
766 EN, et al. Acute Flavivirus and Alphavirus Infections among Children in Two  
767 Different Areas of Kenya, 2015. *Am J Trop Med Hyg.* 2019;100: 170–173.  
768 doi:10.4269/ajtmh.18-0297

- 769 6. Stewart-Ibarra AM, Lowe R. Climate and Non-Climate Drivers of Dengue  
770 Epidemics in Southern Coastal Ecuador. *Am J Trop Med Hyg.* 2013;88: 971–981.  
771 doi:10.4269/ajtmh.12-0478
- 772 7. Jury MR. Climate influence on dengue epidemics in Puerto Rico. *Int J Environ*  
773 *Health Res.* 2008;18: 323–334. doi:10.1080/09603120701849836
- 774 8. Campbell KM, Haldeman K, Lehnig C, Munayco C V., Halsey ES, Laguna-Torres  
775 VA, et al. Weather Regulates Location, Timing, and Intensity of Dengue Virus  
776 Transmission between Humans and Mosquitoes. Michael E, editor. *PLoS Negl*  
777 *Trop Dis.* 2015;9: e0003957. doi:10.1371/journal.pntd.0003957
- 778 9. Adde A, Roucou P, Mangeas M, Ardillon V, Desenclos J-C, Rousset D, et al.  
779 Predicting Dengue Fever Outbreaks in French Guiana Using Climate Indicators.  
780 Scarpino S V., editor. *PLoS Negl Trop Dis.* 2016;10: e0004681.  
781 doi:10.1371/journal.pntd.0004681
- 782 10. Dhimal M, Gautam I, Joshi HD, O’Hara RB, Ahrens B, Kuch U, et al. Risk  
783 Factors for the Presence of Chikungunya and Dengue Vectors (*Aedes aegypti* and  
784 *Aedes albopictus*), Their Altitudinal Distribution and Climatic Determinants of  
785 Their Abundance in Central Nepal. Turell MJ, editor. *PLoS Negl Trop Dis.*  
786 2015;9: e0003545. doi:10.1371/journal.pntd.0003545
- 787 11. Descloux E, Mangeas M, Menkes CE, Lengaigne M, Leroy A, Tehei T, et al.  
788 Climate-Based Models for Understanding and Forecasting Dengue Epidemics.  
789 Anyamba A, editor. *PLoS Negl Trop Dis.* 2012;6: e1470.  
790 doi:10.1371/journal.pntd.0001470
- 791 12. Aswi A, Cramb SM, Moraga P, Mengersen K. *Epidemiology and Infection*

- 792 Bayesian spatial and spatio-temporal approaches to modelling dengue fever: a  
793 systematic review. *Epidemiol Infect.* 2018;147. doi:10.1017/S0950268818002807
- 794 13. Johansson MA, Apfeldorf KM, Dobson S, Devita J, Buczak AL, Baugher B, et al.  
795 An open challenge to advance probabilistic forecasting for dengue epidemics. *Proc*  
796 *Natl Acad Sci.* 2019; 201909865. doi:10.1073/pnas.1909865116
- 797 14. Michael E, Singh BK, Mayala BK, Smith ME, Hampton S, Nabrzyski J.  
798 Continental-scale, data-driven predictive assessment of eliminating the vector-  
799 borne disease, lymphatic filariasis, in sub-Saharan Africa by 2020. *BMC Med.*  
800 2017;15: 176. doi:10.1186/s12916-017-0933-2
- 801 15. Smith T, Maire N, Ross A, Penny M, Chitnis N, Schapira A, et al. Towards a  
802 comprehensive simulation model of malaria epidemiology and control.  
803 *Parasitology.* 2008. pp. 1507–1516. doi:10.1017/S0031182008000371
- 804 16. Ryan SJ, Carlson CJ, Mordecai EA, Johnson LR. Global expansion and  
805 redistribution of *Aedes*-borne virus transmission risk with climate change. Han  
806 BA, editor. *PLoS Negl Trop Dis.* 2019;13: e0007213.  
807 doi:10.1371/journal.pntd.0007213
- 808 17. Kraemer MU, Sinka ME, Duda KA, Mylne AQ, Shearer FM, Barker CM, et al.  
809 The global distribution of the arbovirus vectors *Aedes aegypti* and *Ae. albopictus*.  
810 *Elife.* 2015;4. doi:10.7554/eLife.08347
- 811 18. Powell JR, Tabachnick WJ, Powell JR, Tabachnick WJ. History of domestication  
812 and spread of *Aedes aegypti* - A Review. *Mem Inst Oswaldo Cruz.* 2013;108: 11–  
813 17. doi:10.1590/0074-0276130395
- 814 19. Mordecai EA, Cohen JM, Evans M V., Gudapati P, Johnson LR, Lippi CA, et al.

- 815 Detecting the impact of temperature on transmission of Zika, dengue, and  
816 chikungunya using mechanistic models. Althouse B, editor. PLoS Negl Trop Dis.  
817 2017;11: e0005568. doi:10.1371/journal.pntd.0005568
- 818 20. Shocket MS, Ryan SJ, Mordecai EA. Temperature explains broad patterns of Ross  
819 River virus transmission. Elife. 2018; doi:10.7554/eLife.37762.001
- 820 21. Paull SH, Horton DE, Ashfaq M, Rastogi D, Kramer LD, Diffenbaugh NS, et al.  
821 Drought and immunity determine the intensity of West Nile virus epidemics and  
822 climate change impacts. Proc R Soc B Biol Sci. 2017;284: 20162078.  
823 doi:10.1098/rspb.2016.2078
- 824 22. Costa EAP de A, Santos EM de M, Correia JC, Albuquerque CMR de. Impact of  
825 small variations in temperature and humidity on the reproductive activity and  
826 survival of *Aedes aegypti* (Diptera, Culicidae). Rev Bras Entomol. 2010;54: 488–  
827 493. doi:10.1590/S0085-56262010000300021
- 828 23. Gaaboub IA, El-Sawaf SK, El-Latif MA. Effect of Different Relative Humidities  
829 and Temperatures on Egg-Production and Longevity of Adults of *Anopheles*  
830 (*Myzomyia*) *pharoensis* Theob.1. Zeitschrift für Angew Entomol. 2009;67: 88–94.  
831 doi:10.1111/j.1439-0418.1971.tb02098.x
- 832 24. Koenraadt CJM, Harrington LC. Flushing Effect of Rain on Container-Inhabiting  
833 Mosquitoes *Aedes aegypti* and *Culex pipiens* (Diptera: Culicidae). J Med Entomol.  
834 2009;45: 28–35. doi:10.1603/0022-2585(2008)45[28:FEOROC]2.0.CO;2
- 835 25. Paaijmans KP, Wandago MO, Githeko AK, Takken W, Vulule J. Unexpected High  
836 Losses of *Anopheles gambiae* Larvae Due to Rainfall. Carter D, editor. PLoS One.  
837 2007;2: e1146. doi:10.1371/journal.pone.0001146

- 838 26. Benedum CM, Seidahmed OME, Eltahir EAB, Markuzon N. Statistical modeling  
839 of the effect of rainfall flushing on dengue transmission in Singapore. Reiner RC,  
840 editor. PLoS Negl Trop Dis. 2018;12: e0006935.  
841 doi:10.1371/journal.pntd.0006935
- 842 27. Stewart Ibarra AM, Ryan SJ, Beltrán E, Mejía R, Silva M, Muñoz Á. Dengue  
843 Vector Dynamics (*Aedes aegypti*) Influenced by Climate and Social Factors in  
844 Ecuador: Implications for Targeted Control. Mores CN, editor. PLoS One. 2013;8:  
845 e78263. doi:10.1371/journal.pone.0078263
- 846 28. Pontes RJ, Spielman A, Oliveira-Lima JW, Hodgson JC, Freeman J. Vector  
847 densities that potentiate dengue outbreaks in a Brazilian city. Am J Trop Med Hyg.  
848 2000;62: 378–383. doi:10.4269/ajtmh.2000.62.378
- 849 29. Anyamba A, Linthicum KJ, Small JL, Collins KM, Tucker CJ, Pak EW, et al.  
850 Climate Teleconnections and Recent Patterns of Human and Animal Disease  
851 Outbreaks. Zhou X-N, editor. PLoS Negl Trop Dis. 2012;6: e1465.  
852 doi:10.1371/journal.pntd.0001465
- 853 30. Huber JH, Childs ML, Caldwell JM, Mordecai EA. Seasonal temperature variation  
854 influences climate suitability for dengue, chikungunya, and Zika transmission.  
855 Althouse B, editor. PLoS Negl Trop Dis. 2018;12: e0006451.  
856 doi:10.1371/journal.pntd.0006451
- 857 31. Lourenço J, Recker M. The 2012 Madeira Dengue Outbreak: Epidemiological  
858 Determinants and Future Epidemic Potential. Scarpino S V., editor. PLoS Negl  
859 Trop Dis. 2014;8: e3083. doi:10.1371/journal.pntd.0003083
- 860 32. Li R, Xu L, Bjørnstad ON, Liu K, Song T, Chen A, et al. Climate-driven variation



- 861 in mosquito density predicts the spatiotemporal dynamics of dengue. *Proc Natl*  
862 *Acad Sci.* 2019;119: 3624–3629. doi:10.1073/PNAS.1806094116
- 863 33. Wang X, Tang S, Cheke RA. A stage structured mosquito model incorporating  
864 effects of precipitation and daily temperature fluctuations. *J Theor Biol.* 2016;411:  
865 27–36. doi:10.1016/j.jtbi.2016.09.015
- 866 34. Siraj AS, Oidtman RJ, Huber JH, Kraemer MUG, Brady OJ, Johansson MA, et al.  
867 Temperature modulates dengue virus epidemic growth rates through its effects on  
868 reproduction numbers and generation intervals. Althouse B, editor. *PLoS Negl*  
869 *Trop Dis.* 2017;11: e0005797. doi:10.1371/journal.pntd.0005797
- 870 35. Oidtman RJ, Lai S, Huang Z, Yang J, Siraj AS, Reiner RC, et al. Inter-annual  
871 variation in seasonal dengue epidemics driven by multiple interacting factors in  
872 Guangzhou, China. *Nat Commun.* 2019;10. doi:10.1038/s41467-019-09035-x
- 873 36. Stewart-Ibarra AM, Muñoz ÁG, Ryan SJ, Ayala EB, Borbor-Cordova MJ,  
874 Finkelstein JL, et al. Spatiotemporal clustering, climate periodicity, and social-  
875 ecological risk factors for dengue during an outbreak in Machala, Ecuador, in  
876 2010. *BMC Infect Dis.* 2014;14: 610. doi:10.1186/s12879-014-0610-4
- 877 37. Agha SB, Tchouassi DP, Turell MJ, Bastos ADS, Sang R. Entomological  
878 assessment of dengue virus transmission risk in three urban areas of Kenya. Reiner  
879 RC, editor. *PLoS Negl Trop Dis.* 2019;13: e0007686.  
880 doi:10.1371/journal.pntd.0007686
- 881 38. Agha SB, Tchouassi DP, Bastos ADS, Sang R. Dengue and yellow fever virus  
882 vectors: seasonal abundance, diversity and resting preferences in three Kenyan  
883 cities. *Parasit Vectors.* 2017;10: 628. doi:10.1186/s13071-017-2598-2

- 884 39. Chretien J-P, Anyamba A, Bedno SA, Breiman RF, Sang R, Serگون K, et al.  
885 Drought-Associated Chikungunya Emergence Along Coastal East Africa. *Am J*  
886 *Trop Med Hyg.* 2007;76: 405–407. doi:10.4269/ajtmh.2007.76.405
- 887 40. Vu DM, Mutai N, Heath CJ, Vulule JM, Mutuku FM, Ndenga BA, et al.  
888 Unrecognized Dengue Virus Infections in Children, Western Kenya, 2014-2015.  
889 *Emerg Infect Dis.* 2017;23: 1915–1917. doi:10.3201/eid2311.170807
- 890 41. Gubler DJ, Nalim S, Saroso JS, Saipan H, Tan R. Variation in Susceptibility to  
891 Oral Infection with Dengue Viruses among Geographic Strains of *Aedes Aegypti*  
892 \*. *Am J Trop Med Hyg.* 1979;28: 1045–1052. doi:10.4269/ajtmh.1979.28.1045
- 893 42. Xavier-Carvalho C, Chester Cardoso C, de Souza Kehdya F, Guilherme Pacheco  
894 A, Ozório Moraes M. Host genetics and dengue fever. *Infect Genet Evol.*  
895 2017;56: 99–110. doi:10.1016/J.MEEGID.2017.11.009
- 896 43. Didan K, Barreto Munoz A, Solano R, Huete A. MODIS Vegetation Index User’s  
897 Guide (MOD13 Series) [Internet]. Available: <http://vip.arizona.edu>
- 898 44. Sulla-Menashe D, Friedl MA. User Guide to Collection 6 MODIS Land Cover  
899 (MCD12Q1 and MCD12C1) Product. 2018; doi:10.5067/MODIS/MCD12Q1
- 900 45. Pyper BJ, Peterman RM. Comparison of methods to account for autocorrelation in  
901 correlation analyses of fish data. *Can J Fish Aquat Sci.* 1998;55: 2127–2140.  
902 doi:10.1139/f98-104
- 903 46. Shocket MS, Anderson CB, Caldwell JM, Childs ML, Han S, Harris M, et al.  
904 Environmental drivers of vector-borne disease. *Population Biology of Vector-*  
905 *borne Diseases.* Oxford University Press;
- 906 47. Hurtado-Daz M, Riojas-Rodríguez H, Rothenberg S, Gomez-Dantes H, Cifuentes

- 907 E. Impact of climate variability on the incidence of dengue in Mexico. *Trop Med*  
908 *Int Heal.* 2007;12. doi:10.1111/j.1365-3156.2007.01930.x
- 909 48. Colón-González FJ, Bentham G, Lake IR. Climate Variability and Dengue Fever  
910 in Warm and Humid Mexico. *Am J Trop Med Hyg.* 2011;84: 757–763.  
911 doi:10.4269/ajtmh.2011.10-0609
- 912 49. Wang C, Jiang B, Fan J, Wang F, Liu Q. A Study of the Dengue Epidemic and  
913 Meteorological Factors in Guangzhou, China, by Using a Zero-Inflated Poisson  
914 Regression Model. *Asia Pacific J Public Heal.* 2014;26: 48–57.  
915 doi:10.1177/1010539513490195
- 916 50. Minh An DT, Rocklöv J. Epidemiology of dengue fever in Hanoi from 2002 to  
917 2010 and its meteorological determinants. *Glob Health Action.* 2014;7: 23074.  
918 doi:10.3402/gha.v7.23074
- 919 51. Laureano-Rosario AE, Garcia-Rejon JE, Gomez-Carro S, Farfan-Ale JA, Muller-  
920 Kargera FE. Modelling dengue fever risk in the State of Yucatan, Mexico using  
921 regional-scale satellite-derived sea surface temperature. *Acta Trop.* 2017;172: 50–  
922 57. doi:10.1016/j.actatropica.2017.04.017
- 923 52. Wu P-C, Guoa H-R, Lung S-C, Lin C-Y, Su H-J. Weather as an effective predictor  
924 for occurrence of dengue fever in Taiwan. *Acta Trop.* 2007;103: 50–57.  
925 doi:10.1016/j.actatropica.2007.05.014
- 926 53. Karim MN, Munshi SU, Anwar N, Alam MS. Climatic factors influencing dengue  
927 cases in Dhaka city: a model for dengue prediction. *Indian J Med Res.* 2012;136:  
928 32–9. Available: <http://www.ncbi.nlm.nih.gov/pubmed/22885261>
- 929 54. Nakhapakorn K, Tripathi N. An information value based analysis of physical and

- 930 climatic factors affecting dengue fever and dengue haemorrhagic fever incidence.  
931 Int J Health Geogr. 2005;4: 13. doi:10.1186/1476-072X-4-13
- 932 55. Gharbi M, Quenel P, Gustave J, Cassadou S, Ruche G La, Girdary L, et al. Time  
933 series analysis of dengue incidence in Guadeloupe, French West Indies:  
934 Forecasting models using climate variables as predictors. BMC Infect Dis.  
935 2011;11: 166. doi:10.1186/1471-2334-11-166
- 936 56. Sharmin S, Glass K, Viennet E, Harley D. Interaction of Mean Temperature and  
937 Daily Fluctuation Influences Dengue Incidence in Dhaka, Bangladesh. Kasper M,  
938 editor. PLoS Negl Trop Dis. 2015;9: e0003901. doi:10.1371/journal.pntd.0003901
- 939 57. Sriprom M, Chalvet-Monfray K, Chaimane T, Vongsawat K, Bicout DJ. Monthly  
940 district level risk of dengue occurrences in Sakon Nakhon Province, Thailand. Sci  
941 Total Environ. 2010;408: 5521–5528. doi:10.1016/J.SCITOTENV.2010.08.024
- 942 58. Martínez-Bello D, López-Quílez A, Prieto AT. Spatiotemporal modeling of  
943 relative risk of dengue disease in Colombia. Stoch Environ Res Risk Assess.  
944 2018;32: 1587–1601. doi:10.1007/s00477-017-1461-5
- 945 59. Mordecai EA, Caldwell JM, Grossman MK, Lippi CA, Johnson LR, Neira M, et  
946 al. Thermal biology of mosquito-borne disease. Byers J (Jeb), editor. Ecol Lett.  
947 2019; ele.13335. doi:10.1111/ele.13335
- 948 60. Carrington LB, Armijos MV, Lambrechts L, Barker CM, Scott TW. Effects of  
949 Fluctuating Daily Temperatures at Critical Thermal Extremes on *Aedes aegypti*  
950 Life-History Traits. PLoS One. 2013;8. doi:10.1371/journal.pone.0058824
- 951 61. Ngugi HN, Mutuku FM, Ndenga BA, Musunzaji PS, Mbakaya JO, Aswani P, et al.  
952 Characterization and productivity profiles of *Aedes aegypti* (L.) breeding habitats

- 953 across rural and urban landscapes in western and coastal Kenya. *Parasit Vectors*.  
954 2017;10: 331. doi:10.1186/s13071-017-2271-9
- 955 62. Lowe R, Gasparrini A, Van Meerbeeck CJ, Lippi CA, Mahon R, Trotman AR, et  
956 al. Nonlinear and delayed impacts of climate on dengue risk in Barbados: A  
957 modelling study. *PLoS Med*. 2018;15. doi:10.1371/journal.pmed.1002613
- 958 63. Li C, Wang X, Wu X, Liu J, Ji D, Du J. Modeling and projection of dengue fever  
959 cases in Guangzhou based on variation of weather factors. *Sci Total Environ*.  
960 2017;605–606: 867–873. doi:10.1016/j.scitotenv.2017.06.181
- 961 64. Li CF, Lim TW, Han LL, Fang R. Rainfall, abundance of *Aedes aegypti* and  
962 dengue infection in Selangor, Malaysia. *Southeast Asian J Trop Med Public  
963 Health*. 1985;16: 560–8. Available: <http://www.ncbi.nlm.nih.gov/pubmed/3835698>
- 964 65. Johansson MA, Dominici F, Glass GE. Local and Global Effects of Climate on  
965 Dengue Transmission in Puerto Rico. Massad E, editor. *PLoS Negl Trop Dis*.  
966 2009;3: e382. doi:10.1371/journal.pntd.0000382
- 967 66. Kenneson A, Beltrán-Ayala E, Borbor-Cordova MJ, Polhemus ME, Ryan SJ, Endy  
968 TP, et al. Social-ecological factors and preventive actions decrease the risk of  
969 dengue infection at the household-level: Results from a prospective dengue  
970 surveillance study in Machala, Ecuador. Messer WB, editor. *PLoS Negl Trop Dis*.  
971 2017;11: e0006150. doi:10.1371/journal.pntd.0006150
- 972 67. Reich NG, Shrestha S, King AA, Rohani P, Lessler J, Kalayanarooj S, et al.  
973 Interactions between serotypes of dengue highlight epidemiological impact of  
974 cross-immunity. *J R Soc Interface*. 2013;10: 20130414.  
975 doi:10.1098/rsif.2013.0414

- 976 68. Wen J, Elong Ngono A, Regla-Nava JA, Kim K, Gorman MJ, Diamond MS, et al.  
977 Dengue virus-reactive CD8+ T cells mediate cross-protection against subsequent  
978 Zika virus challenge. *Nat Commun.* 2017;8: 1459. doi:10.1038/s41467-017-  
979 01669-z
- 980 69. Rodriguez-Barraquer I, Salje H, Cummings DA. Opportunities for improved  
981 surveillance and control of dengue from age-specific case data. *Elife.* 2019;8.  
982 doi:10.7554/eLife.45474
- 983 70. Stoddard ST, Forshey BM, Morrison AC, Paz-Soldan VA, Vazquez-Prokopec  
984 GM, Astete H, et al. House-to-house human movement drives dengue virus  
985 transmission. *Proc Natl Acad Sci U S A.* 2013;110: 994–999.  
986 doi:10.1073/pnas.1213349110
- 987 71. Wesolowski A, Qureshi T, Boni MF, Sundsøy PR, Johansson MA, Rasheed SB, et  
988 al. Impact of human mobility on the emergence of dengue epidemics in Pakistan.  
989 *Proc Natl Acad Sci.* 2015;112: 11887–11892. doi:10.1073/pnas.1504964112
- 990 72. Vaidya A, Bravo-Salgado AD, Mikler AR. Modeling climate-dependent  
991 population dynamics of mosquitoes to guide public health policies. *Proc 5th ACM*  
992 *Conf Bioinformatics, Comput Biol Heal Informatics - BCB '14.* 2014; 380–389.  
993 doi:10.1145/2649387.2649415
- 994 73. Schmidt CA, Comeau G, Monaghan AJ, Williamson DJ, Ernst KC. Effects of  
995 desiccation stress on adult female longevity in *Aedes aegypti* and *Ae. albopictus*  
996 (Diptera: Culicidae): results of a systematic review and pooled survival analysis.  
997 *Parasit Vectors.* 2018;11: 267. doi:10.1186/s13071-018-2808-6
- 998 74. Vazquez-Prokopec GM, Galvin WA, Kelly R, Kitron U. A New, Cost-Effective,

- 999 Battery-Powered Aspirator for Adult Mosquito Collections. *J Med Entomol.*  
1000 2009;46: 1256–1259. doi:10.1603/033.046.0602
- 1001 75. Waggoner JJ, Gresh L, Mohamed-Hadley A, Ballesteros G, Davila MJV, Tellez Y,  
1002 et al. Single-Reaction Multiplex Reverse Transcription PCR for Detection of Zika,  
1003 Chikungunya, and Dengue Viruses. *Emerg Infect Dis.* 2016;22: 1295–7.  
1004 doi:10.3201/eid2207.160326
- 1005 76. Lanciotti RS, Calisher CH, Gubler DJ, Chang GJ, Vorndam A V. Rapid detection  
1006 and typing of dengue viruses from clinical samples by using reverse transcriptase-  
1007 polymerase chain reaction. *J Clin Microbiol.* 1992;30: 545–51. Available:  
1008 <http://www.ncbi.nlm.nih.gov/pubmed/1372617>
- 1009 77. Grossi-Soyster EN, Cook EAJ, de Glanville WA, Thomas LF, Krystosik AR, Lee  
1010 J, et al. Serological and spatial analysis of alphavirus and flavivirus prevalence and  
1011 risk factors in a rural community in western Kenya. Bingham A, editor. *PLoS Negl*  
1012 *Trop Dis.* 2017;11: e0005998. doi:10.1371/journal.pntd.0005998
- 1013 78. Palamara GM, Childs DZ, Clements CF, Petchey OL, Plebani M, Smith MJ.  
1014 Inferring the temperature dependence of population parameters: The effects of  
1015 experimental design and inference algorithm. *Ecol Evol.* 2014;4: 4736–4750.  
1016 doi:10.1002/ece3.1309
- 1017 79. Team RC. R: A Language and Environment for Statistical Computing. R Found  
1018 Stat Comput. 2018; Available: <https://www.r-project.org>  
1019

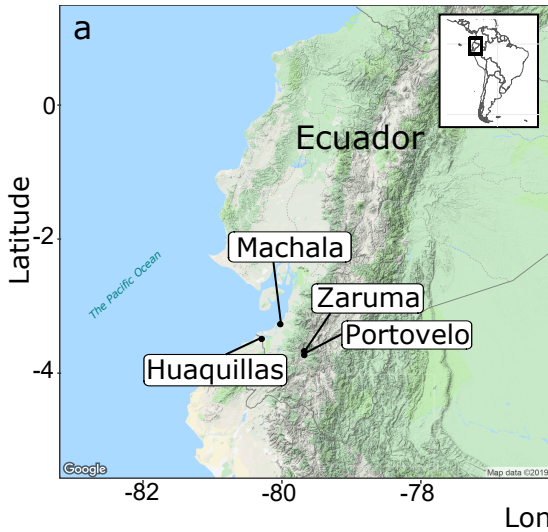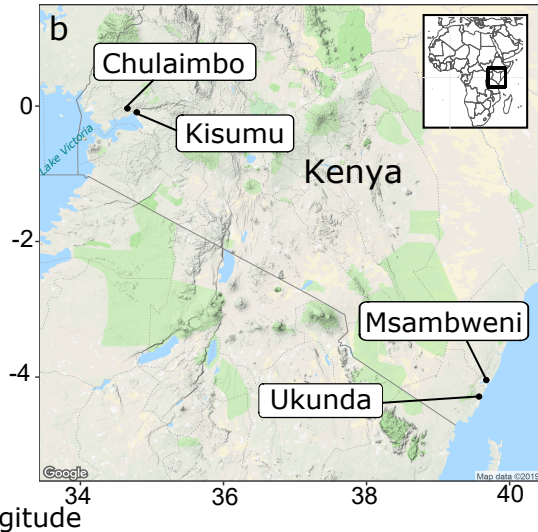



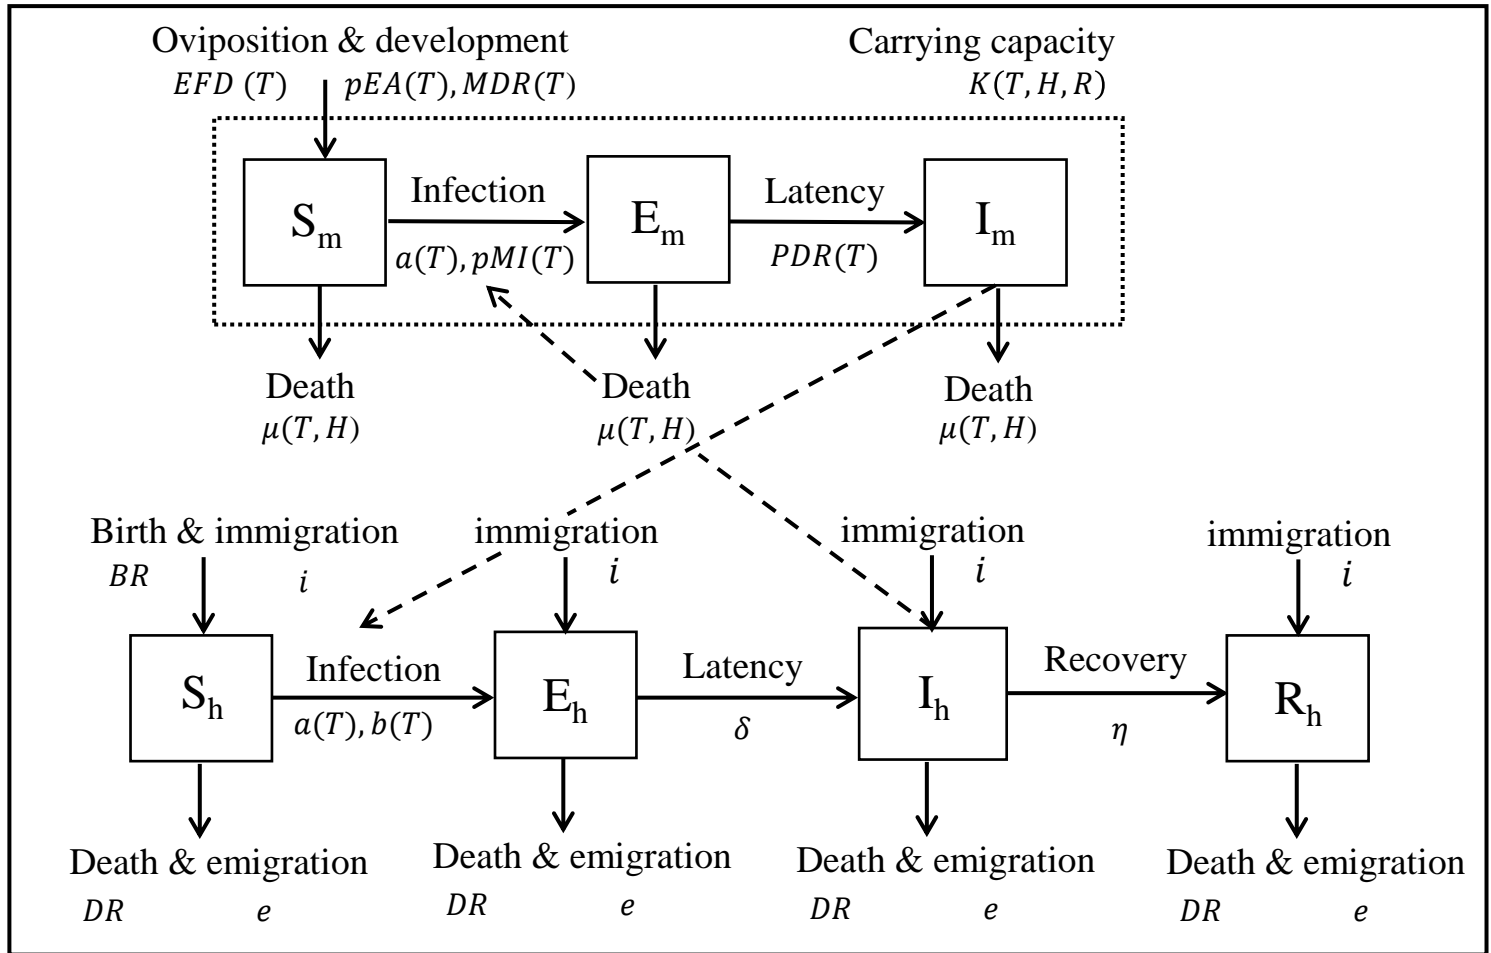

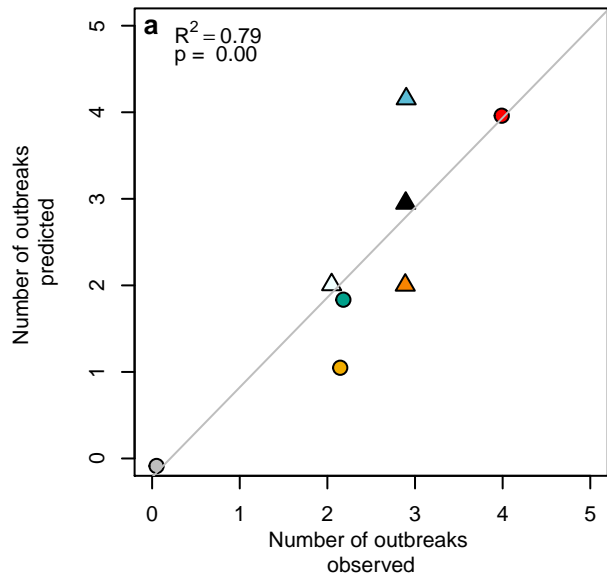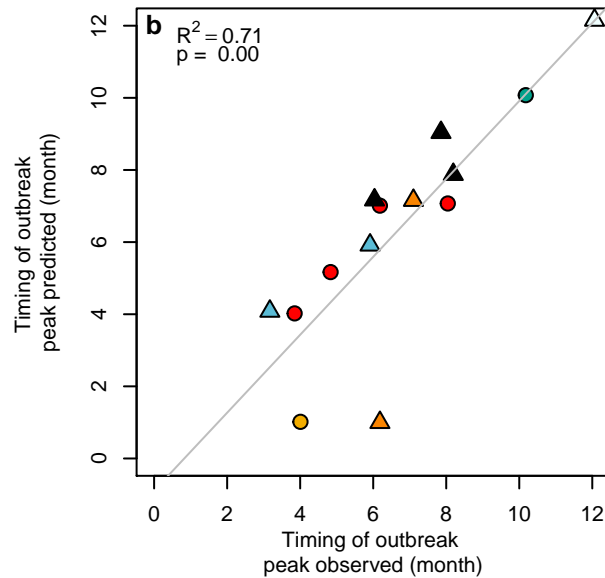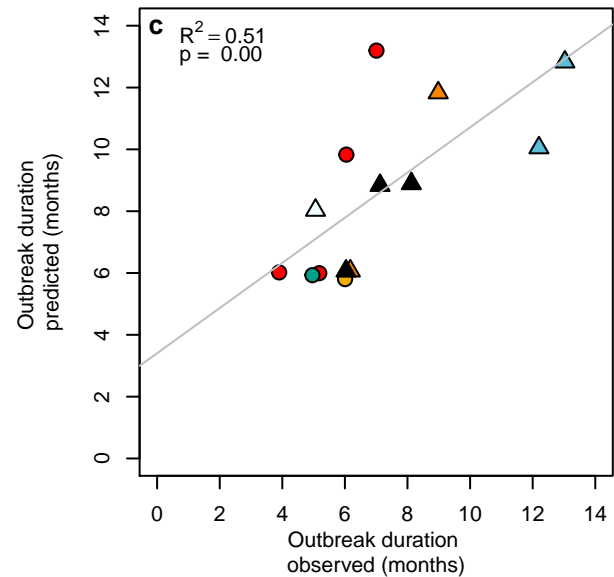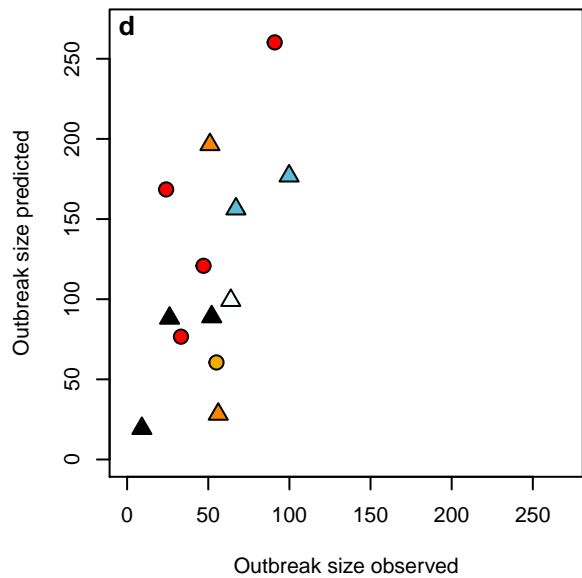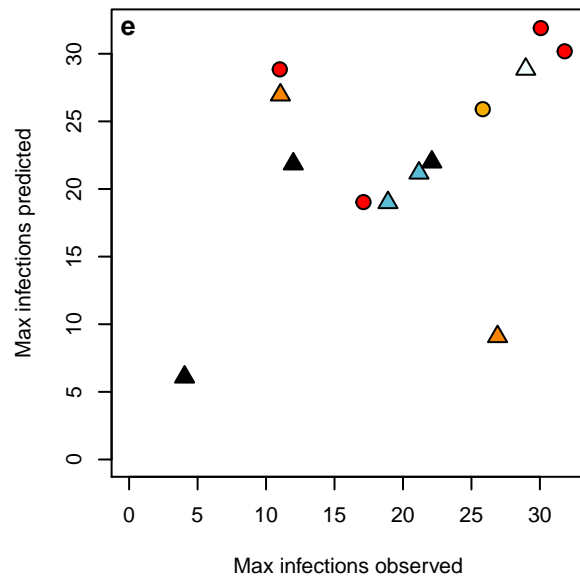

- Huaquillas
- Machala
- Portovelo
- Zaruma
- ▲ Chulaimbo
- ▲ Kisumu
- △ Msambweni
- ▲ Ukunda

### Vector dynamics

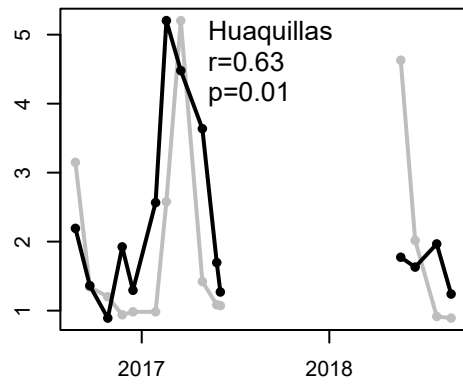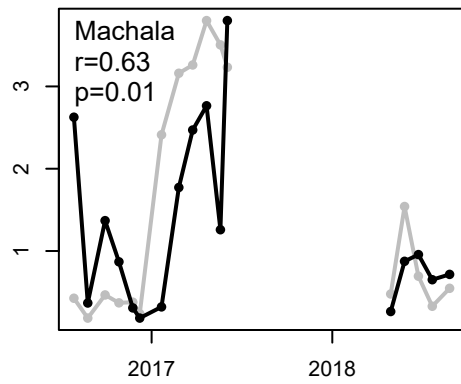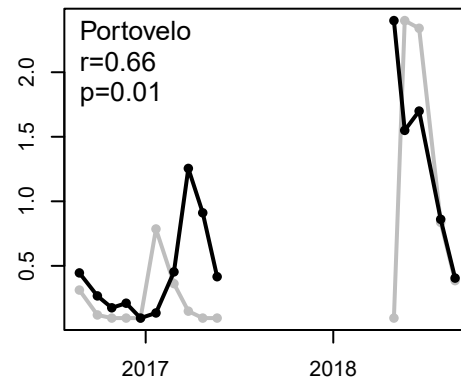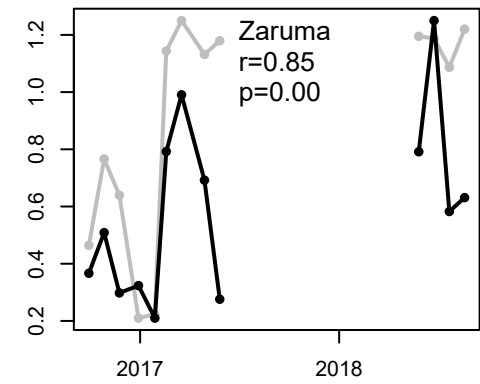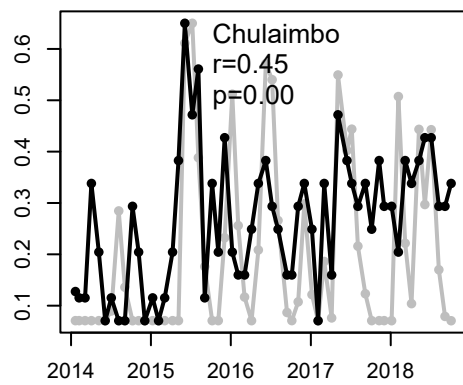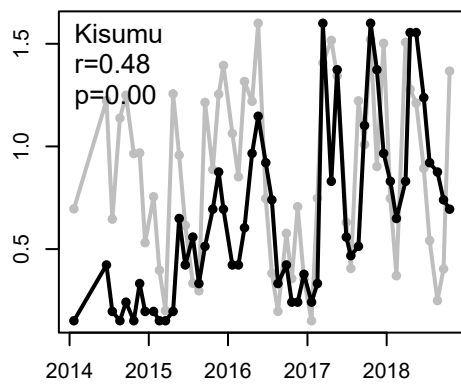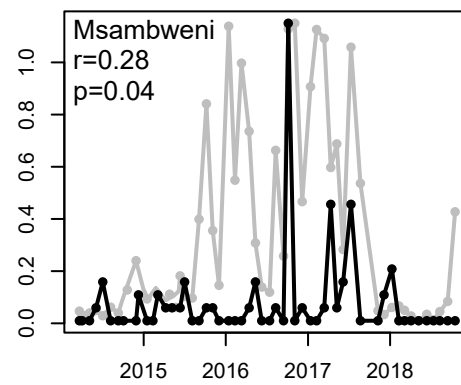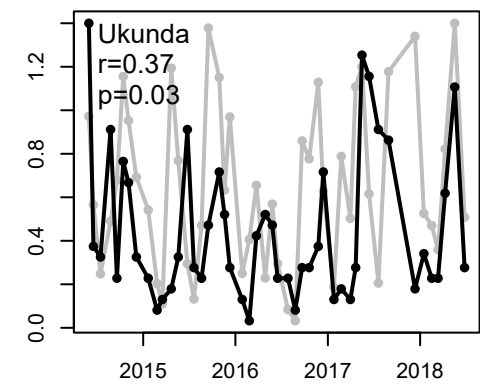

Observed arboviral cases  
(laboratory confirmed)

### Human disease dynamics

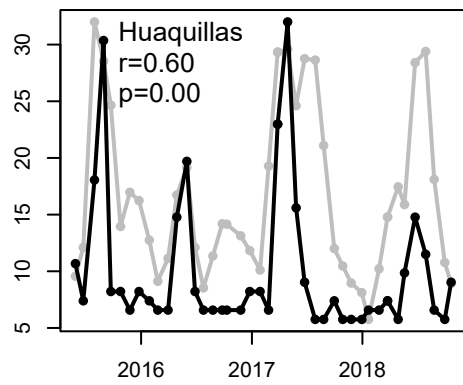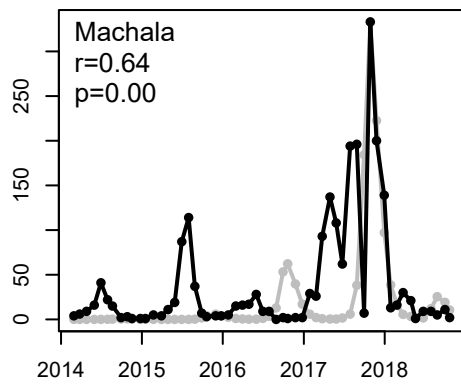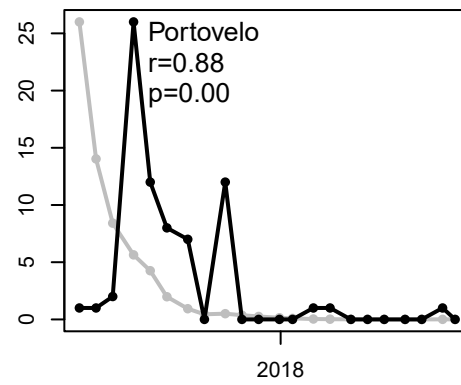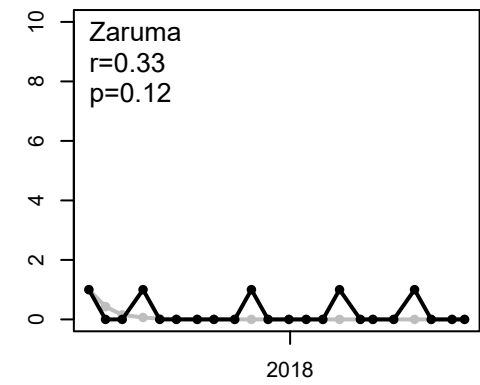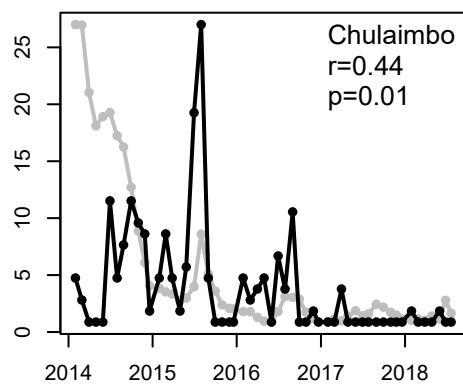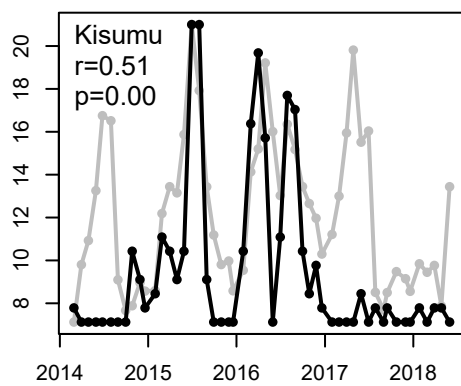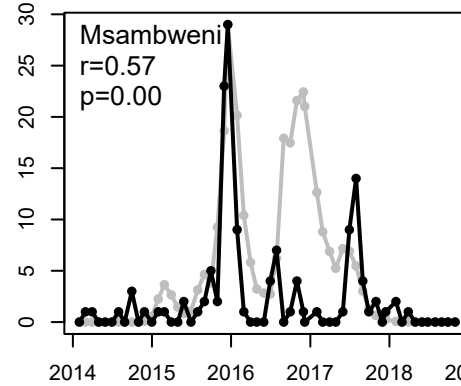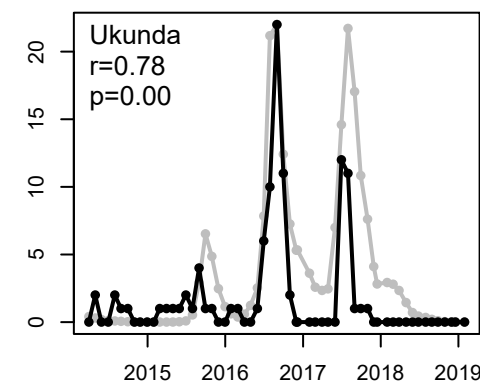

Observed mosquito abundance  
(*Aedes aegypti*)

Model predictions  
Observations

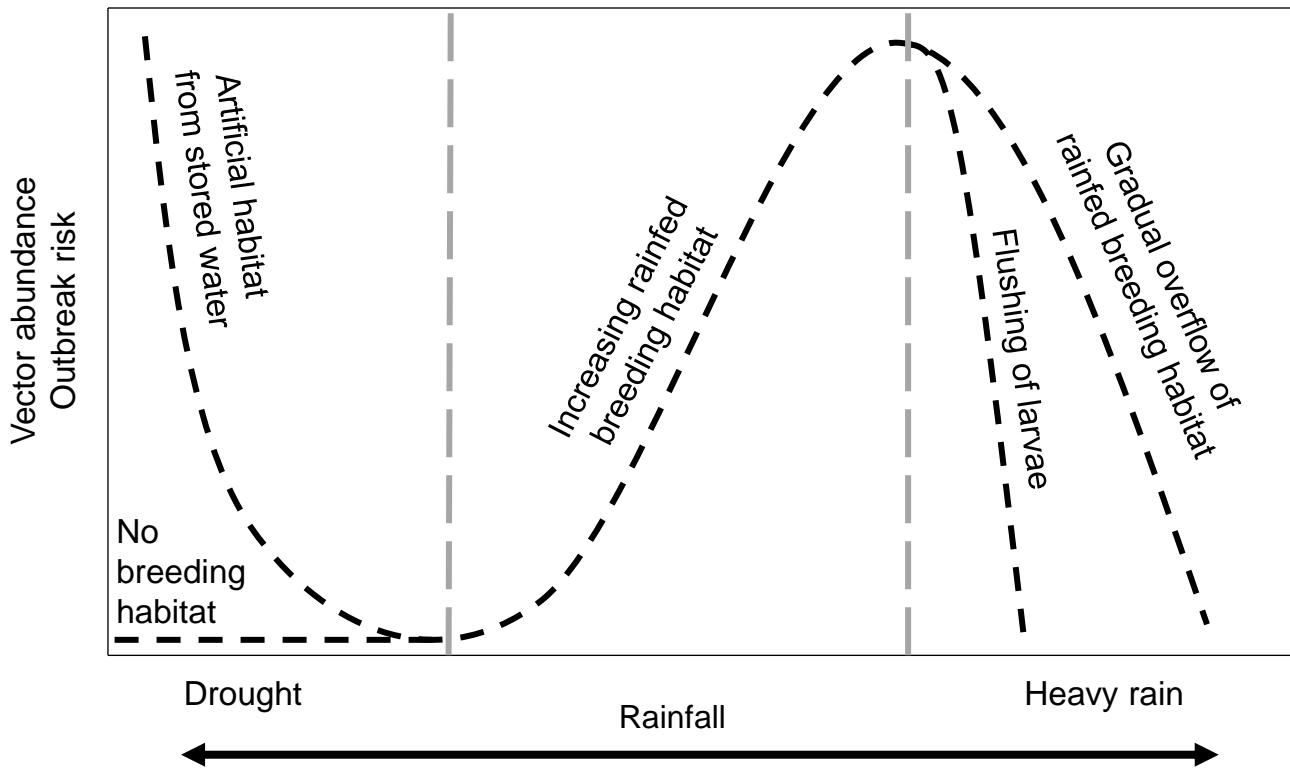

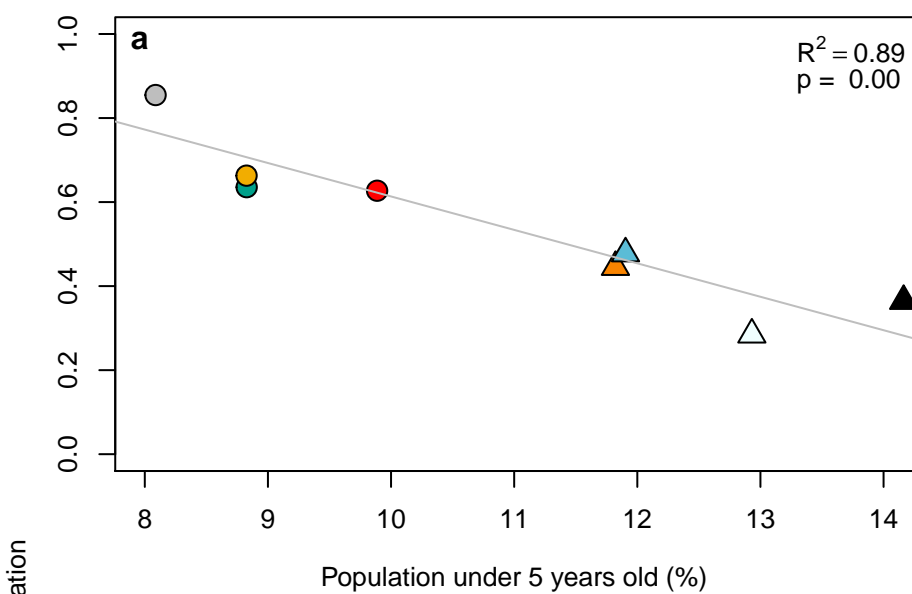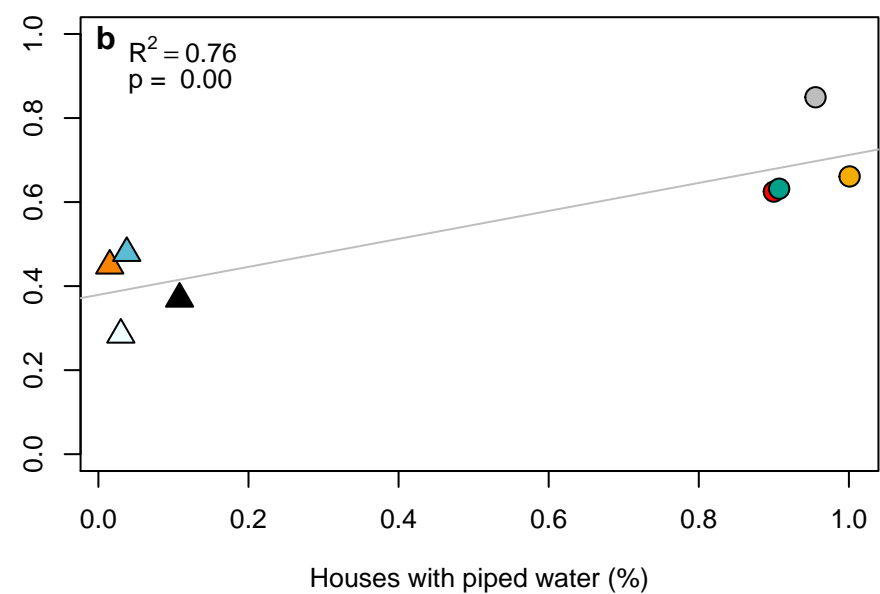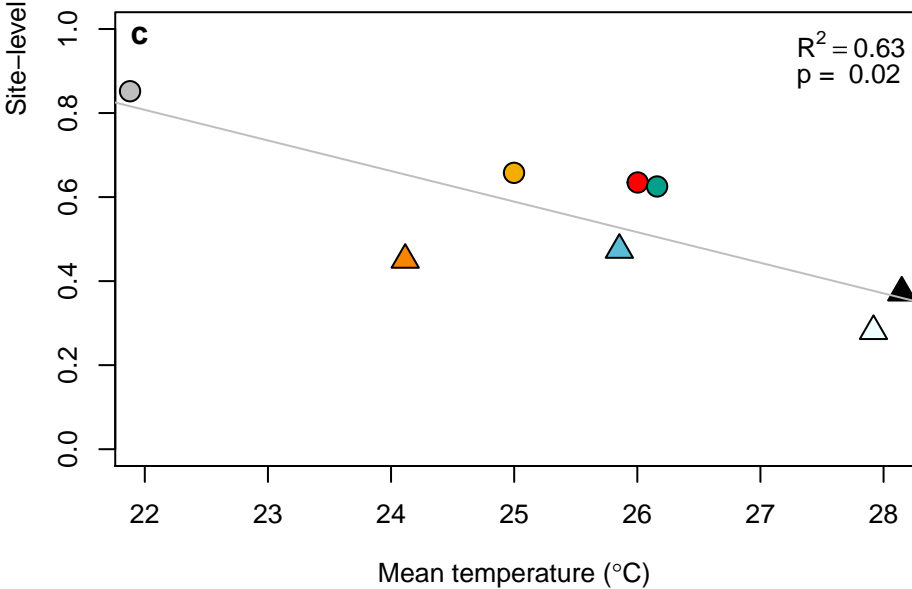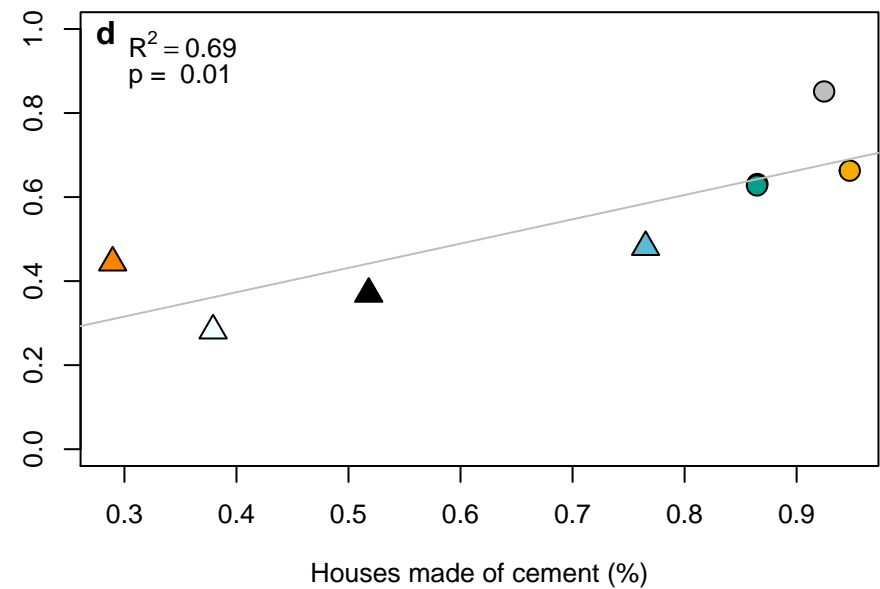

▲ Chulaimbo ● Huaquillas ▲ Kisumu ● Machala △ Msambweni ● Portovelo ▲ Ukunda ● Zaruma

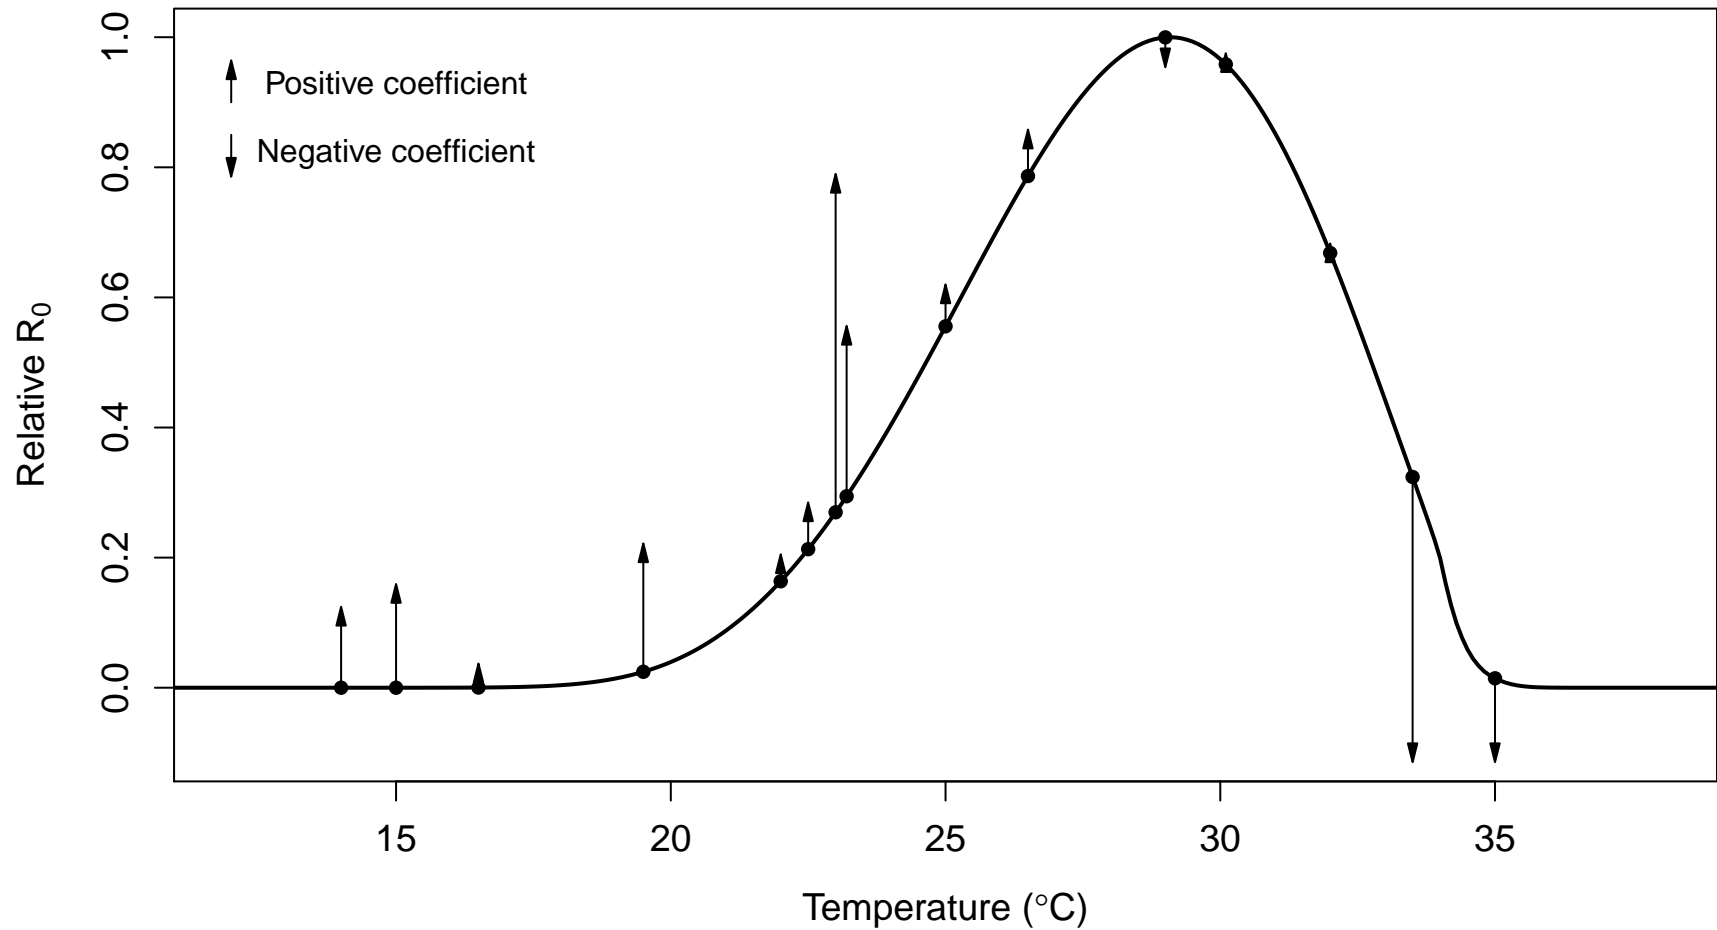

Source: https://www.biorxiv.org/content/10.1101/2020.02.07.938720v5.full.pdf
